# Supplementary material
Source: PubMed Central journal article supplement (PMC7233370)

# Discovery and development of small-molecule inhibitors of glycogen synthase

*Buyun Tang<sup>1</sup>, Mykhaylo S. Frasinuk<sup>2,3</sup>, Vimbai M. Chikwana<sup>1</sup>, Krishna K. Mahalingan<sup>1</sup>, Cynthia A. Morgan<sup>1</sup>, Dyann M. Segvich<sup>1</sup>, Svitlana P. Bondarenko<sup>3</sup>, Galyna P. Mrug<sup>2,3</sup>, Przemyslaw Wyrebek<sup>4</sup>, David S. Watt<sup>4-6</sup>, Anna A. DePaoli-Roach<sup>1</sup>, Peter J. Roach<sup>1</sup> and Thomas D. Hurley<sup>1\*</sup>*

<sup>1</sup>Department of Biochemistry and Molecular Biology, Indiana University School of Medicine, Indianapolis, Indiana 46202, United States; <sup>2</sup>V. P. Kukhar Institute of Bioorganic Chemistry and Petrochemistry, NAS of Ukraine, Kyiv 02094, Ukraine; <sup>3</sup>National University of Food Technologies, Kyiv 01601, Ukraine; <sup>4</sup>Department of Molecular and Cellular Biochemistry, University of Kentucky, Lexington, Kentucky 40506, United States; <sup>5</sup>Center for Pharmaceutical Research and Innovation, College of Pharmacy, University of Kentucky, Lexington, Kentucky 40536, United States; <sup>6</sup>Lucille Parker Markey Cancer Center, University of Kentucky, Lexington, Kentucky 40536, United States

\*Email: [thurley@iupui.edu](mailto:thurley@iupui.edu)

## Table of Contents

|                                                               |         |
|---------------------------------------------------------------|---------|
| Supplemental Figures S1-S3                                    | S2-S4   |
| Supplemental Tables S1-S2                                     | S5-S6   |
| Vendor Supplied Compound Purity                               | S7-S17  |
| LC/MS and NMR Confirmation of Author Provided Compound Purity | S18-S58 |

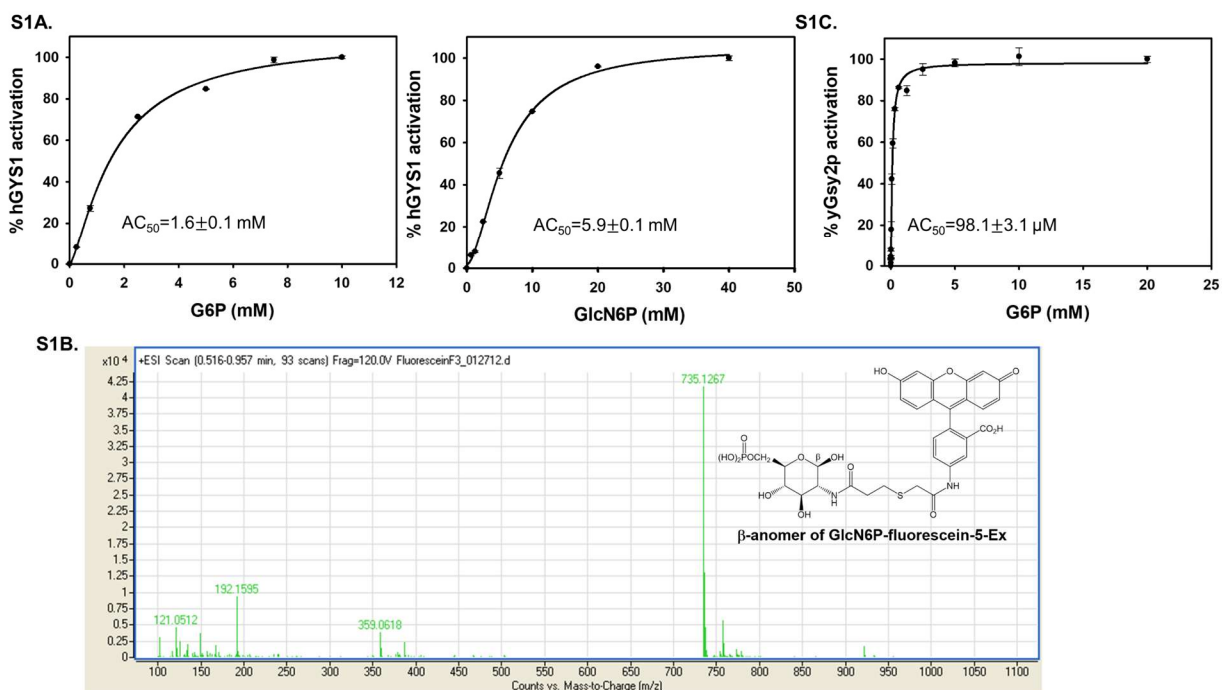

**Figure S1. Validation of fluorescence polarization assay.** (A) Human GYS1 activation in the presence of varying concentrations of G6P or GlcN6P. The half maximal activation ( $AC_{50}$ ) of G6P or GlcN6P was determined as  $1.6 \pm 0.1$  and  $5.9 \pm 0.1$  mM, respectively. Averages of triplicate assays  $\pm$  SEM are shown. (B) The HPLC-purified product of fluorophore coupling reaction was confirmed by mass spectrometry demonstrating  $m/z$  of 735.1267. (C) Yeast Gsy2p activation in the presence of varying concentrations of G6P.  $AC_{50}$  was determined as  $98.1 \pm 3.1$   $\mu$ M. Averages of triplicate assays  $\pm$  SEM are shown. These kinetic analyses are representative experiments from at least three independent experiments.

S2.

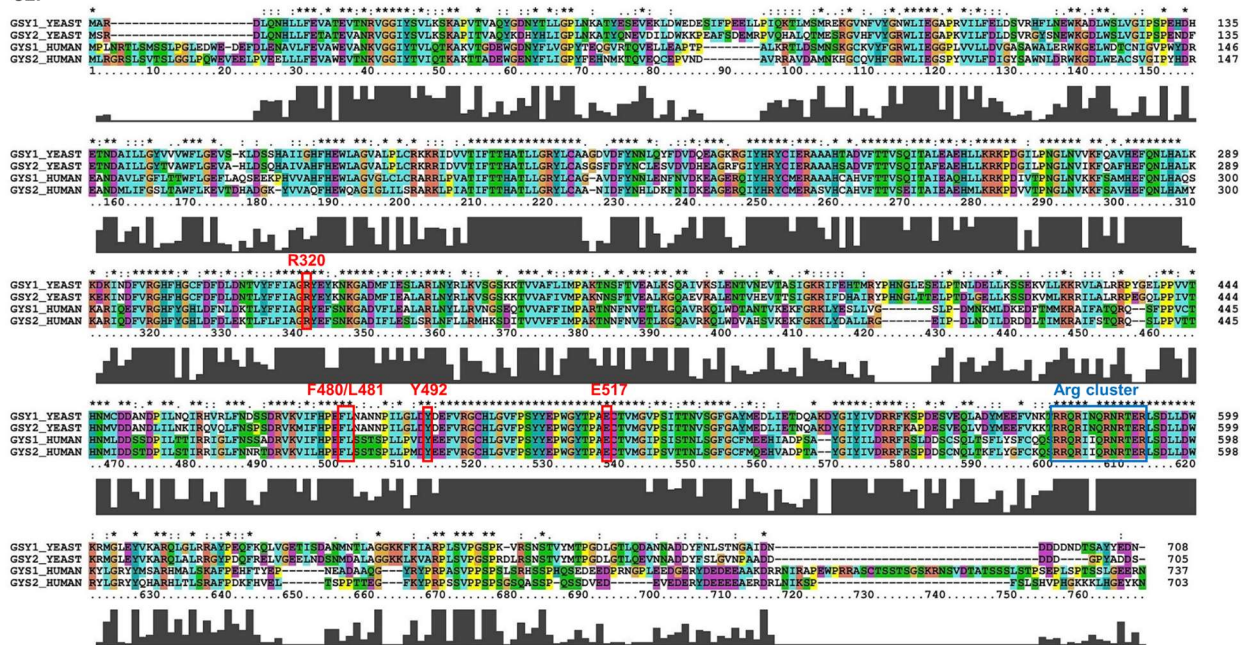

**Figure S2. Sequence alignment of yeast and human glycogen synthase.** The overall sequence identity between yGsy2p and hGYS1 is around 55%. Residues that form the active site, including R320/F480/L481/Y492/E517 (shown in red box), and G6P binding site (Arg cluster, shown in blue box) are highly conserved across yeast and human species. The sequence alignment was generated using ClustalX.

S3.

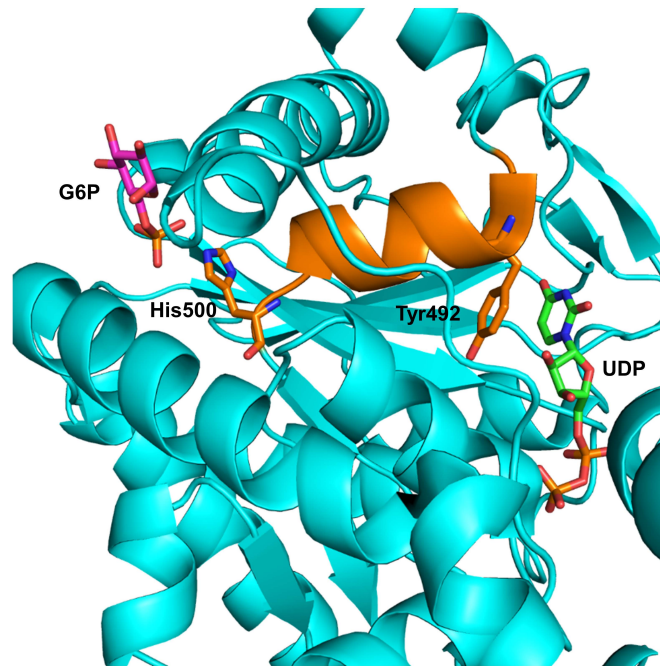

**Figure S3. Structural overview of the binding sites for allosteric activator G6P and UDP.** The UDP and G6P binding sites lie on opposing ends of the same alpha-helix (orange), with Tyr492 contacting the uracil ring of UDP (green) and His500 contacting the phosphate of G6P (magenta).

**Table S1. Small molecule screening data**

| Category          | Parameter                                | Description                                                                                                                                                                                                 |
|-------------------|------------------------------------------|-------------------------------------------------------------------------------------------------------------------------------------------------------------------------------------------------------------|
| Assay             | Type of assay                            | In vitro                                                                                                                                                                                                    |
|                   | Target                                   | Gsy2, <i>Saccharomyces cerevisiae</i>                                                                                                                                                                       |
|                   | Primary measurement                      | Detection of fluorescence polarization                                                                                                                                                                      |
|                   | Key reagents                             | Purified yeast synthase Gsy2p (3 $\mu$ M), synthesized and purified fluorophore GlcN6P-fluorescein-5-Ex (20 nM)                                                                                             |
|                   | Assay protocol                           | The fluorescence polarization (FP) experiments were described in methods.                                                                                                                                   |
| Library           | Library size                             | 50,000                                                                                                                                                                                                      |
|                   | Library composition                      | The Library is selected from ChemBridge's EXPRESSPick Collection stock of more than 480,000 handcrafted compounds.                                                                                          |
|                   | Source                                   | ChemBridge Corporation                                                                                                                                                                                      |
| Screen            | Format                                   | 384-well plate                                                                                                                                                                                              |
|                   | Concentration tested                     | 10 $\mu$ M, 1.2 % DMSO                                                                                                                                                                                      |
|                   | Plate controls                           | For the negative controls 10 $\mu$ L of DMSO (6%) was added and for the positive controls 10 $\mu$ L of G6P was added for a final concentration of 2 mM to 40 $\mu$ L reaction mixture in a 384-well plate. |
|                   | Reagent/compound dispensing system       | Multi-drop 384 liquid dispenser (Titertek)                                                                                                                                                                  |
|                   | Detection instrument                     | EnVision® Multilabel plate reader (PerkinElmer)                                                                                                                                                             |
| Post-HTS analysis | Assay validation/QC                      | Plate corrected individual Z'-scores                                                                                                                                                                        |
|                   | Hit criteria                             | Z'-score threshold of -1, equivalent to a separation of 3 standard deviations between $\mu_c$ (means of the control signal) and $\mu_s$ (means of the library sample signal)                                |
|                   | Hit rate                                 | 0.23%                                                                                                                                                                                                       |
|                   | Additional assay(s)                      | Hits were validated using standard $^{14}$ C-glucose incorporation assay against yGsy2p, using 100 $\mu$ M compounds in triplicate.                                                                         |
|                   | Confirmation of hit purity and structure | LC/MS or NMR                                                                                                                                                                                                |

Table S2. HTS plate layout

|   | 1 | 2 | 3 | 4 | 5 | 6 | 7 | 8 | 9 | 10 | 11 | 12 | 13 | 14 | 15 | 16 | 17 | 18 | 19 | 20 | 21 | 22 | 23 | 24 |  |
|---|---|---|---|---|---|---|---|---|---|----|----|----|----|----|----|----|----|----|----|----|----|----|----|----|--|
| A |   |   |   |   |   |   |   |   |   |    |    |    |    |    |    |    |    |    |    |    |    |    |    |    |  |
| B |   |   |   |   |   |   |   |   |   |    |    |    |    |    |    |    |    |    |    |    |    |    |    |    |  |
| C |   |   |   |   |   |   |   |   |   |    |    |    |    |    |    |    |    |    |    |    |    |    |    |    |  |
| D |   |   |   |   |   |   |   |   |   |    |    |    |    |    |    |    |    |    |    |    |    |    |    |    |  |
| E |   |   |   |   |   |   |   |   |   |    |    |    |    |    |    |    |    |    |    |    |    |    |    |    |  |
| F |   |   |   |   |   |   |   |   |   |    |    |    |    |    |    |    |    |    |    |    |    |    |    |    |  |
| G |   |   |   |   |   |   |   |   |   |    |    |    |    |    |    |    |    |    |    |    |    |    |    |    |  |
| H |   |   |   |   |   |   |   |   |   |    |    |    |    |    |    |    |    |    |    |    |    |    |    |    |  |
| I |   |   |   |   |   |   |   |   |   |    |    |    |    |    |    |    |    |    |    |    |    |    |    |    |  |
| J |   |   |   |   |   |   |   |   |   |    |    |    |    |    |    |    |    |    |    |    |    |    |    |    |  |
| K |   |   |   |   |   |   |   |   |   |    |    |    |    |    |    |    |    |    |    |    |    |    |    |    |  |
| L |   |   |   |   |   |   |   |   |   |    |    |    |    |    |    |    |    |    |    |    |    |    |    |    |  |
| M |   |   |   |   |   |   |   |   |   |    |    |    |    |    |    |    |    |    |    |    |    |    |    |    |  |
| N |   |   |   |   |   |   |   |   |   |    |    |    |    |    |    |    |    |    |    |    |    |    |    |    |  |
| O |   |   |   |   |   |   |   |   |   |    |    |    |    |    |    |    |    |    |    |    |    |    |    |    |  |
| P |   |   |   |   |   |   |   |   |   |    |    |    |    |    |    |    |    |    |    |    |    |    |    |    |  |

+Compounds ( $\mu_s, \sigma_s$ )

+G6P  
↓

+DMSO ( $\mu_c, \sigma_c$ )

Assuming  $\sigma_c = \sigma_s$ , setting  $Z' = -1$ ,

$$\therefore Z' = 1 - \frac{3(\sigma_c + \sigma_s)}{|\mu_c - \mu_s|} = -1,$$

$$\therefore \mu_c - \mu_s = 3\sigma_c.$$

Primary hits were identified if  $mP < \mu_c - 3\sigma_c$ .

## **Vendor Supplied Compound Purity**

# Compound H23 2-methoxy-4-(1-(2-(1-methylpyrrolidin-2-yl)ethyl)-4-phenyl-1H-imidazol-5-yl)phenol

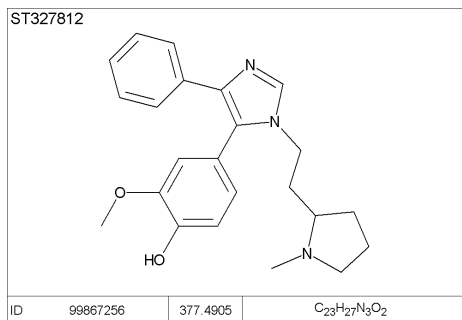

Data File R:\HPLC\AUTO\ST3278\1DB-1301.D

Sample Name: ST3278P1-D-02

Instrument 1 15/03/2017 16:35:50

Column: Onyx C18 50x4.6mm | 3.75ml/min | Columns Reg Valve

Gradient: "A"->@2.2min->"B"(Hold 0.4min)->@0.2min->"A"->PostRun

PMP1, Solvent A : 0.1%TFA, 2.5%AcN in H2O

PMP1, Solvent B : 0.1%TFA in AcN

PMP1, Solvent C : --NOT USED--

PMP1, Solvent D : --NOT USED--

Ionization mode : API-ES Positive

Signal 1: ADC1 B, ELSD

| Peak #  | RetTime [min] | Type | Width [min] | Area [mV*s] | Height [mV] | Area %  |
|---------|---------------|------|-------------|-------------|-------------|---------|
| 1       | 1.101         | MF   | 0.0537      | 209.82787   | 65.14832    | 89.8558 |
| 2       | 1.214         | FM   | 0.0556      | 13.77166    | 4.12806     | 5.8975  |
| 3       | 1.354         | BB   | 0.0805      | 9.91668     | 1.83537     | 4.2467  |
| Totals: |               |      |             | 233.51620   | 71.11175    |         |

Signal 2: DAD1 A, Sig=300,200 Ref=off

| Peak #  | RetTime [min] | Type | Width [min] | Area [mAU*s] | Height [mAU] | Area %  |
|---------|---------------|------|-------------|--------------|--------------|---------|
| 1       | 1.004         | BV   | 0.0423      | 2328.00488   | 896.85773    | 74.2856 |
| 2       | 1.123         | VB   | 0.0361      | 509.29916    | 211.54639    | 16.2515 |
| 3       | 1.258         | MM   | 0.0626      | 296.55338    | 78.95360     | 9.4629  |
| Totals: |               |      |             | 3133.85742   | 1187.35771   |         |

Signal 3: MSD1 TIC, MS File

| Peak #  | RetTime [min] | Type | Width [min] | Area      | Height    | Area %   |
|---------|---------------|------|-------------|-----------|-----------|----------|
| 1       | 1.032         | MM   | 0.0559      | 4.30185e6 | 1.28168e6 | 100.0000 |
| Totals: |               |      |             | 4.30185e6 | 1.28168e6 |          |

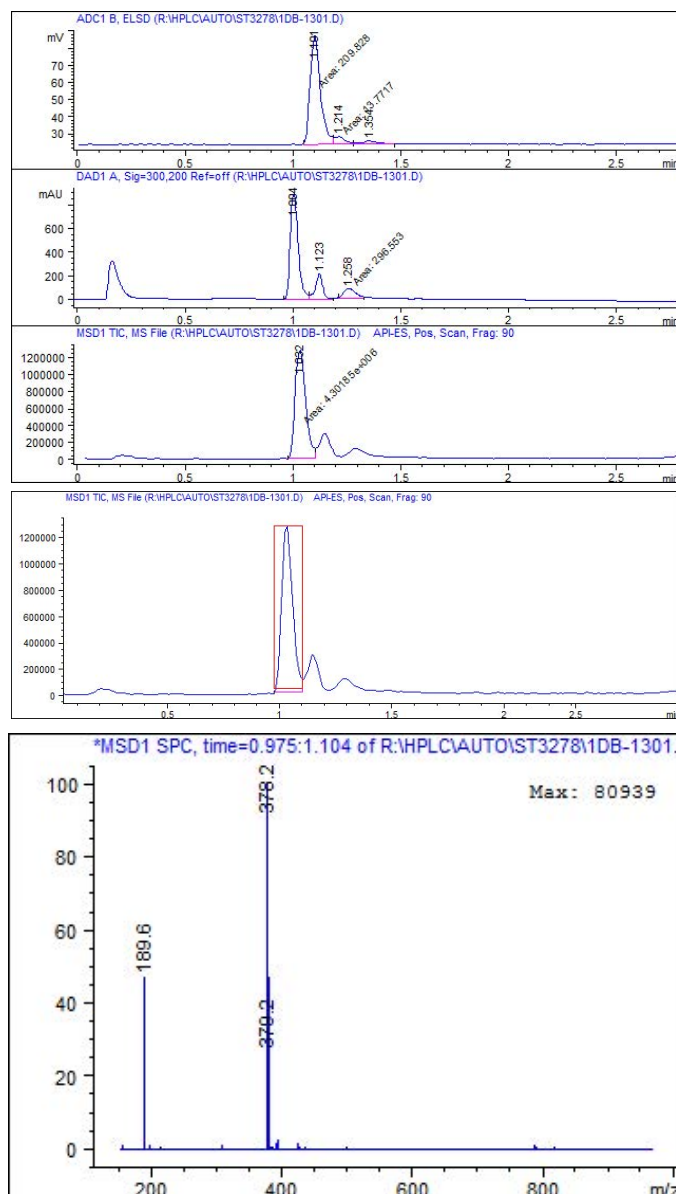



# Compound 1 4-{1-[2-(1-methylpyrrolidin-2-yl)ethyl]-4-phenyl-1H-imidazol-5-yl}pyridine

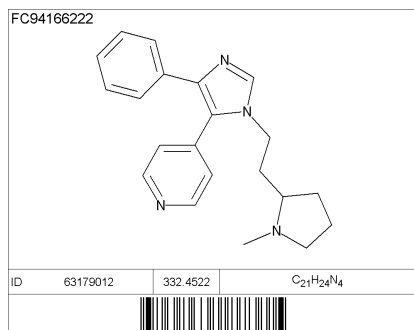

Data File D:\DATA\2433\1FC-2001.D

Sample Name: Fc941662P1-F-03

Instrument 1 04/09/2010 00:14:00 #2

Column: Monolithic SpeedROD C18e 50x4.6mm | 3.75ml/min

Gradient: "A"->@2.1min->"B"(Hold 0.8min)->@0.2min->"A"->PostRun

PMP1, Solvent A : 0.1%TFA in MeOH/H2O (2.5:97.5)

PMP1, Solvent B : 0.1% TFA in MeOH

PMP1, Solvent C : 0.1%FA in ACN/H2O (2.5:97.5)

PMP1, Solvent D : 0.1%FA in ACN

Ionization mode : API-ES Positive

Signal 1: ADC1 A, ELSD

| Peak #  | RetTime [min] | Type | Width [min] | Area [mV*s] | Height [mV] | Area %   |
|---------|---------------|------|-------------|-------------|-------------|----------|
| 1       | 0.845         | PB   | 0.0266      | 12.95548    | 7.32153     | 100.0000 |
| Totals: |               |      |             | 12.95548    | 7.32153     |          |

Signal 2: DAD1 A, Sig=300,200 Ref=off

| Peak #  | RetTime [min] | Type | Width [min] | Area [mAU*s] | Height [mAU] | Area %  |
|---------|---------------|------|-------------|--------------|--------------|---------|
| 1       | 0.752         | BV   | 0.0249      | 27.03587     | 17.66420     | 2.8398  |
| 2       | 0.802         | VP   | 0.0280      | 925.00928    | 514.86444    | 97.1602 |
| Totals: |               |      |             | 952.04514    | 532.52864    |         |

Signal 3: MSD1 TIC, MS File

| Peak #  | RetTime [min] | Type | Width [min] | Area      | Height    | Area %   |
|---------|---------------|------|-------------|-----------|-----------|----------|
| 1       | 0.858         | BB   | 0.0465      | 9.29456e6 | 3.04246e6 | 100.0000 |
| Totals: |               |      |             | 9.29456e6 | 3.04246e6 |          |

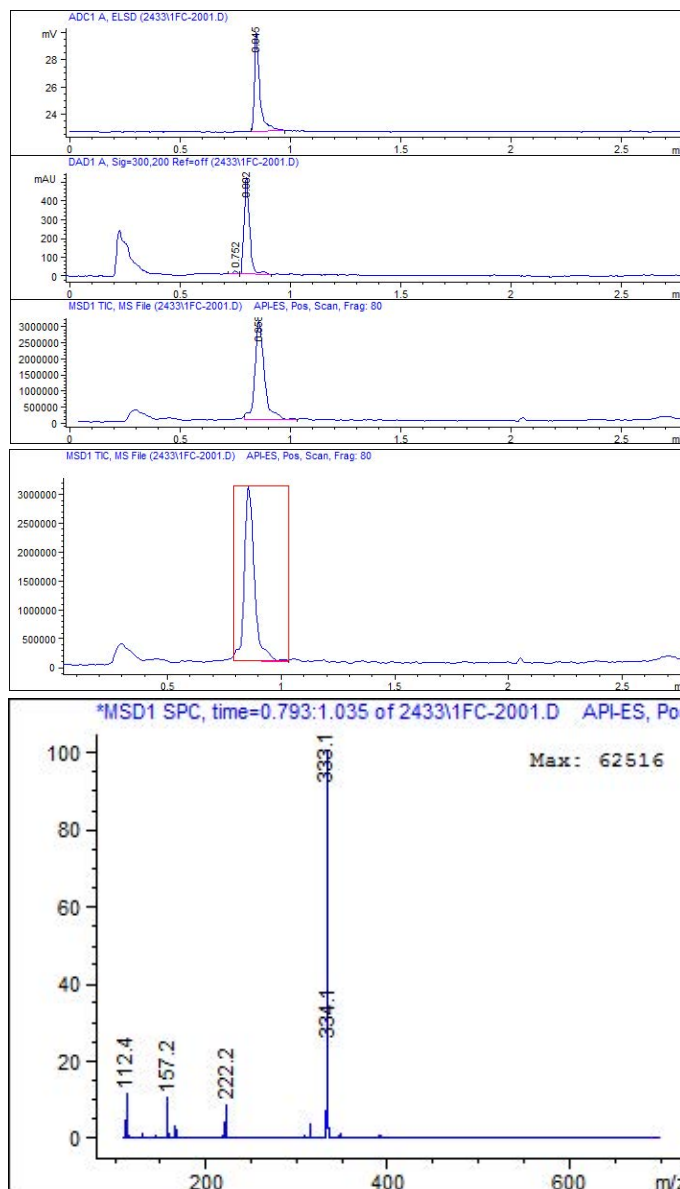

**Compound 2** 4-{1-[2-(1H-imidazol-4-yl)ethyl]-4-phenyl-1H-imidazol-5-yl}pyridine

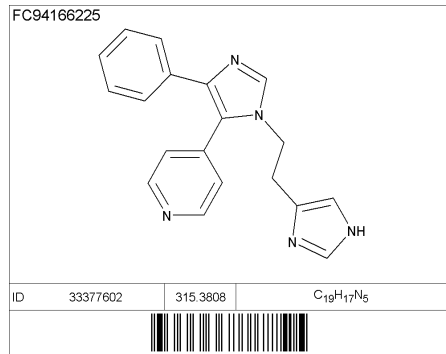

Data File R:\AUTO\FC941662\1AD-2301.D

Sample Name: Fc941662P1-A-04

Instrument 1 06.09.2010 16:37:40

PMP1, Solvent A : 0.1%TFA in MeOH/H2O (2.5:97.5)

PMP1, Solvent B : 0.1% TFA in MeOH

PMP1, Solvent C : 0.1%FA in ACN/H2O (2.5:97.5)

PMP1, Solvent D : 0.1%FA in ACN

Ionization mode : API-ES Positive

Signal 1: ADC1 A, ELSD

| Peak #  | RetTime [min] | Type | Width [min] | Area [mV*s] | Height [mV] | Area %  |
|---------|---------------|------|-------------|-------------|-------------|---------|
| 1       | 0.814         | MF   | 0.0305      | 21.20461    | 11.57888    | 96.1132 |
| 2       | 0.880         | FM   | 0.0252      | 8.57519e-1  | 5.67921e-1  | 3.8868  |
| Totals: |               |      |             | 22.06213    | 12.14680    |         |

Signal 2: DAD1 A, Sig=300,200 Ref=off

| Peak #  | RetTime [min] | Type | Width [min] | Area [mAU*s] | Height [mAU] | Area %  |
|---------|---------------|------|-------------|--------------|--------------|---------|
| 1       | 0.768         | MF   | 0.0313      | 1239.09827   | 658.82440    | 94.1505 |
| 2       | 0.837         | FM   | 0.0312      | 76.98392     | 41.12902     | 5.8495  |
| Totals: |               |      |             | 1316.08219   | 699.95342    |         |

Signal 3: MSD1 TIC, MS File

| Peak #  | RetTime [min] | Type | Width [min] | Area      | Height    | Area %   |
|---------|---------------|------|-------------|-----------|-----------|----------|
| 1       | 0.826         | MM   | 0.0442      | 7.78936e6 | 2.93575e6 | 100.0000 |
| Totals: |               |      |             | 7.78936e6 | 2.93575e6 |          |

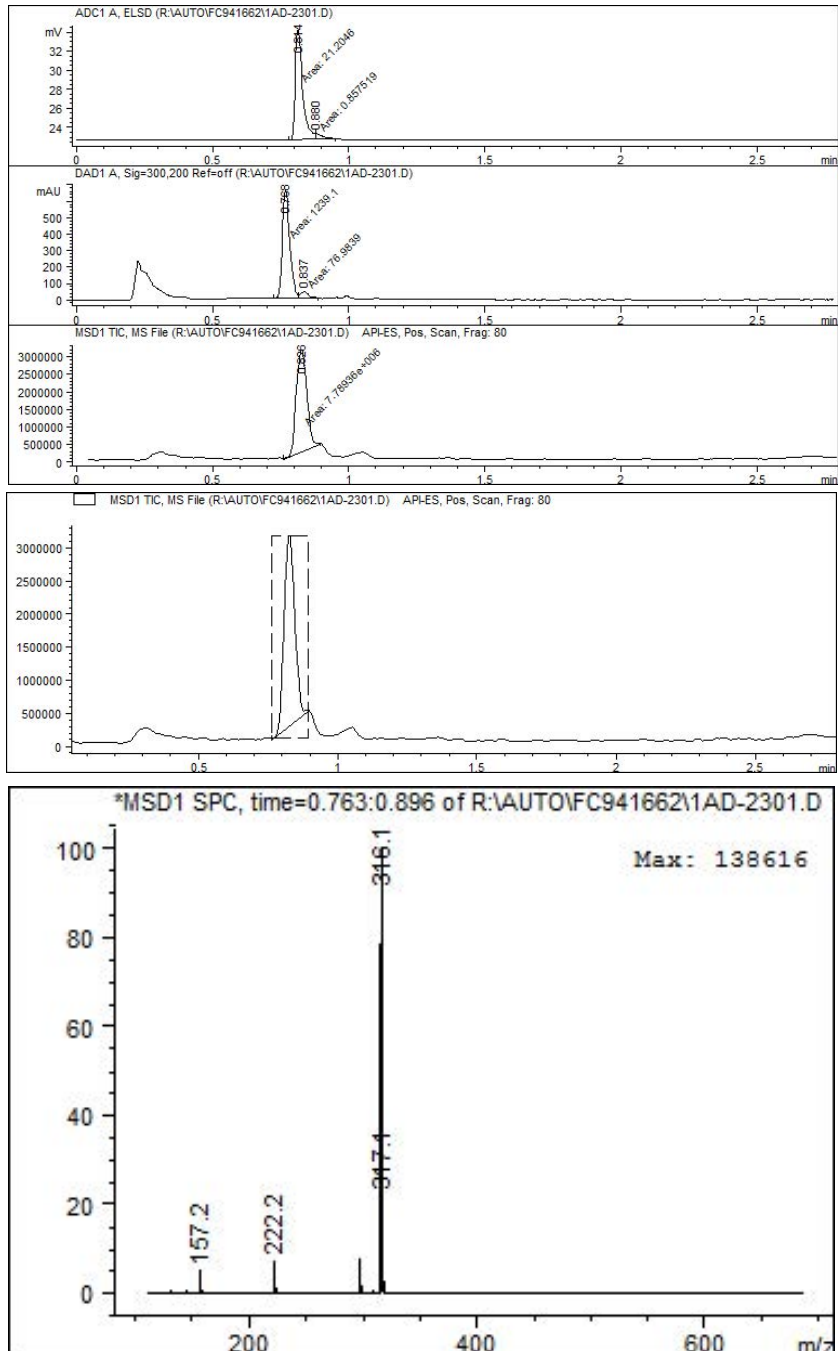

**Compound 3** 4-{1-[2-(1H-imidazol-4-yl)ethyl]-4-phenyl-1H-imidazol-5-yl}phenol

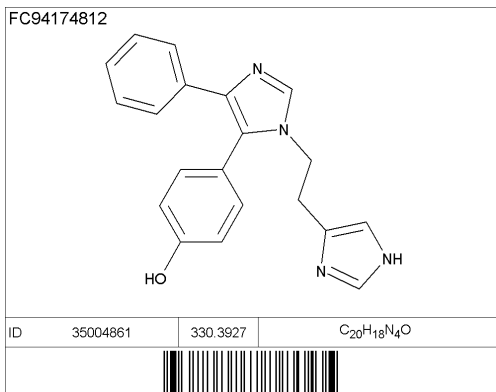

Data File D:\DATA\603\2DB-5001.D

Sample Name: Fc941748P2-D-02

Instrument 1 10.09.2010 19:00:13 #6

Column: SpeedROD Rp-18e 50x4.6mm | 3.75ml/min |

Columns Reg Valve

Gradient: "A"->@2.2min->"B"(Hold 0.4min)->@0.2min->"A"->PostRun

PMP1, Solvent A : 0.1%TFA in Acn/H2O (2.5:97.5)

PMP1, Solvent B : 0.1% TFA in AcN

PMP1, Solvent C : 0.1%FA in ACN/H2O (2.5:97.5)

PMP1, Solvent D : 0.1%FA in ACN

Ionization mode : APCI Positive

Signal 1: ADC1 A, ELSD

| Peak # | RetTime [min] | Type | Width [min] | Area [mV*s] | Height [mV] | Area %   |
|--------|---------------|------|-------------|-------------|-------------|----------|
| 1      | 0.964         | PB   | 0.0317      | 768.15430   | 377.87949   | 100.0000 |

Totals : 768.15430 377.87949

Signal 2: DAD1 A, Sig=300,200 Ref=off

| Peak # | RetTime [min] | Type | Width [min] | Area [mAU*s] | Height [mAU] | Area %  |
|--------|---------------|------|-------------|--------------|--------------|---------|
| 1      | 0.912         | BV   | 0.0276      | 1701.42871   | 962.96936    | 88.3473 |
| 2      | 0.987         | VV   | 0.0240      | 83.76084     | 54.38354     | 4.3493  |
| 3      | 1.036         | VV   | 0.0233      | 104.42519    | 70.54584     | 5.4223  |
| 4      | 1.080         | VP   | 0.0258      | 36.22654     | 21.31683     | 1.8811  |

Totals : 1925.84129 1109.21557

Signal 3: MSD1 TIC, MS File

| Peak # | RetTime [min] | Type | Width [min] | Area      | Height    | Area %   |
|--------|---------------|------|-------------|-----------|-----------|----------|
| 1      | 0.937         | PB   | 0.0396      | 2.00729e7 | 7.70528e6 | 100.0000 |

Totals : 2.00729e7 7.70528e6

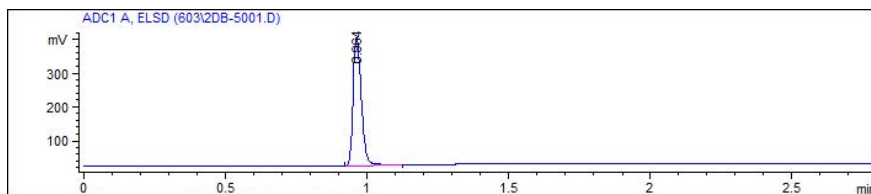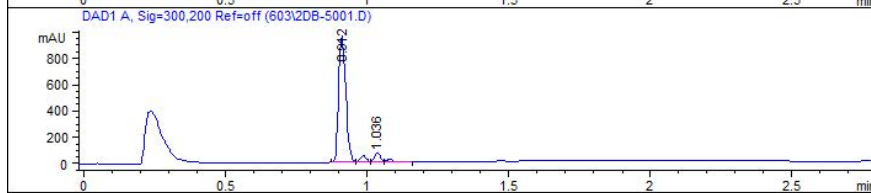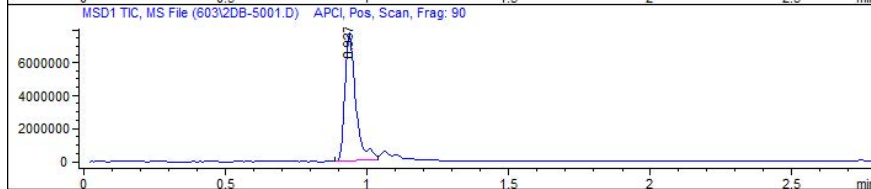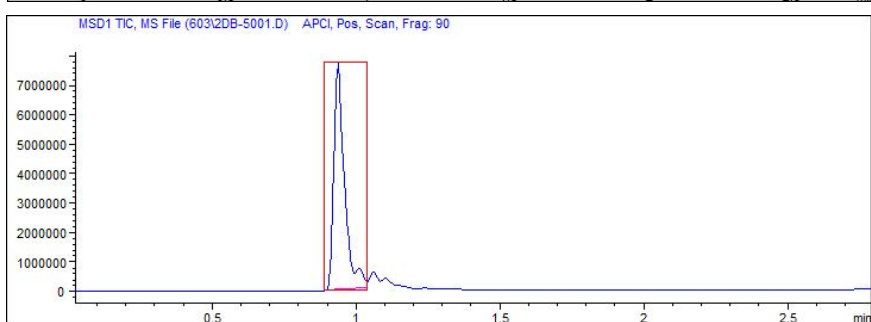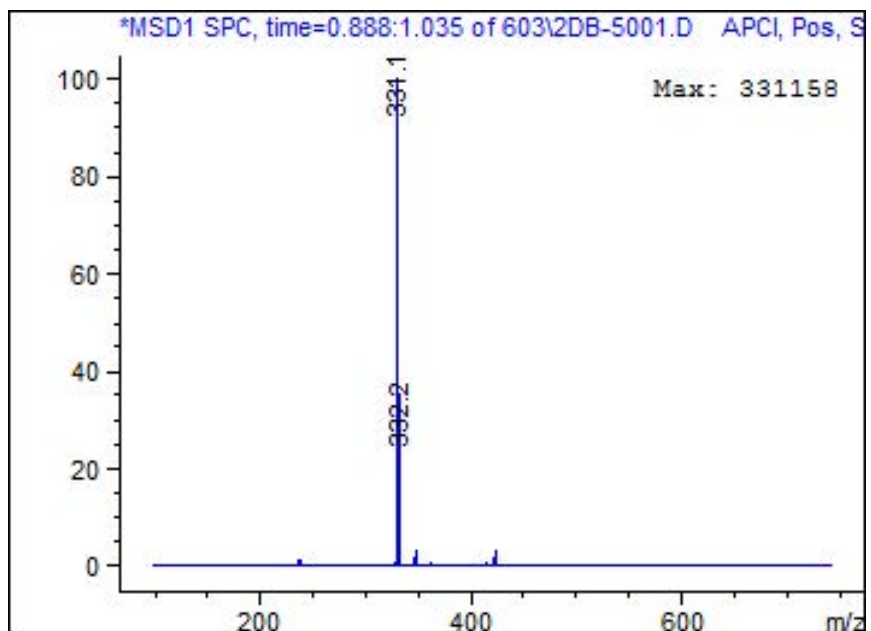

# Compound 4 4-{1-[3-(1H-imidazol-1-yl)propyl]-4-phenyl-1H-imidazol-5-yl}phenol

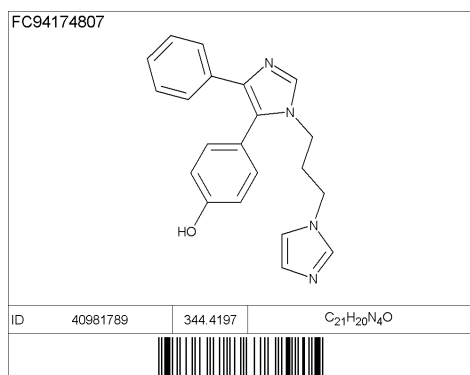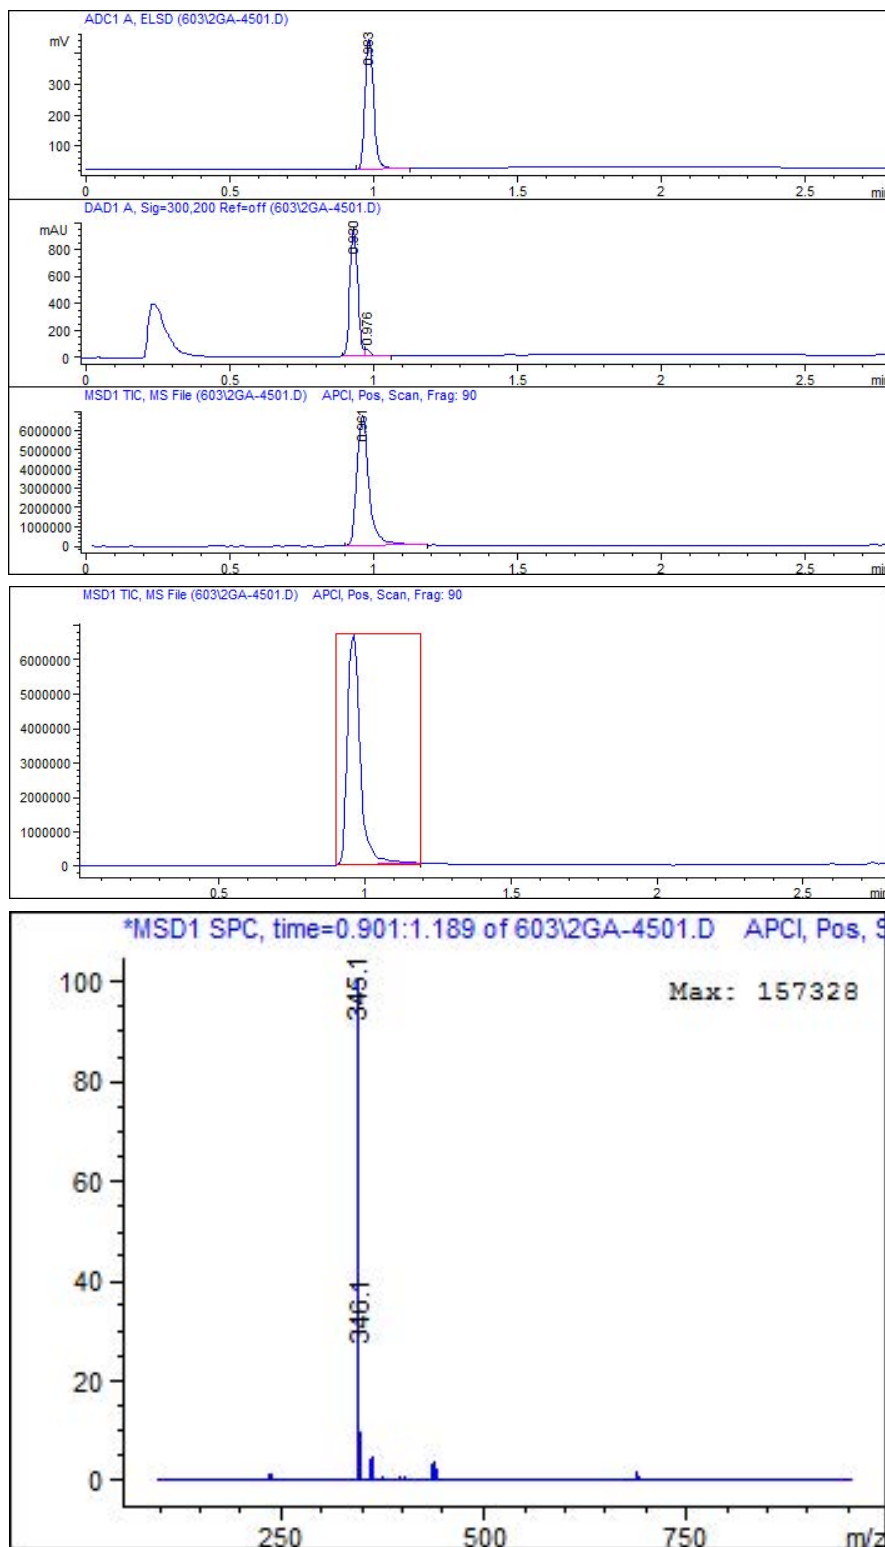

Data File D:\DATA\603\2GA-4501.D

Sample Name: Fc941748P2-G-01

Instrument 1 10.09.2010 18:39:12 #6

Column: SpeedROD Rp-18e 50x4.6mm | 3.75ml/min |

Columns Reg Valve

Gradient: "A"->@2.2min->"B"(Hold 0.4min)->@0.2min->"A"->PostRun

PMP1, Solvent A : 0.1%TFA in Acn/H2O (2.5:97.5)

PMP1, Solvent B : 0.1% TFA in AcN

PMP1, Solvent C : 0.1%FA in ACN/H2O (2.5:97.5)

PMP1, Solvent D : 0.1%FA in ACN

Ionization mode : APCI Positive

Signal 1: ADC1 A, ELSD

| Peak # | RetTime [min] | Type | Width [min] | Area [mV*s] | Height [mV] | Area %   |
|--------|---------------|------|-------------|-------------|-------------|----------|
| 1      | 0.983         | PB   | 0.0320      | 857.73596   | 417.74936   | 100.0000 |

Totals : 857.73596 417.74936

Signal 2: DAD1 A, Sig=300,200 Ref=off

| Peak # | RetTime [min] | Type | Width [min] | Area [mAU*s] | Height [mAU] | Area %  |
|--------|---------------|------|-------------|--------------|--------------|---------|
| 1      | 0.930         | BV   | 0.0294      | 1759.64807   | 958.73767    | 96.0558 |
| 2      | 0.976         | VP   | 0.0229      | 72.25453     | 52.58591     | 3.9442  |

Totals : 1831.90260 1011.32358

Signal 3: MSD1 TIC, MS File

| Peak # | RetTime [min] | Type | Width [min] | Area      | Height    | Area %   |
|--------|---------------|------|-------------|-----------|-----------|----------|
| 1      | 0.961         | PP   | 0.0464      | 2.03361e7 | 6.70778e6 | 100.0000 |

Totals : 2.03361e7 6.70778e6

Compound 5 4-(2-methyl-5-phenyl-1H-pyrrol-1-yl)phenol

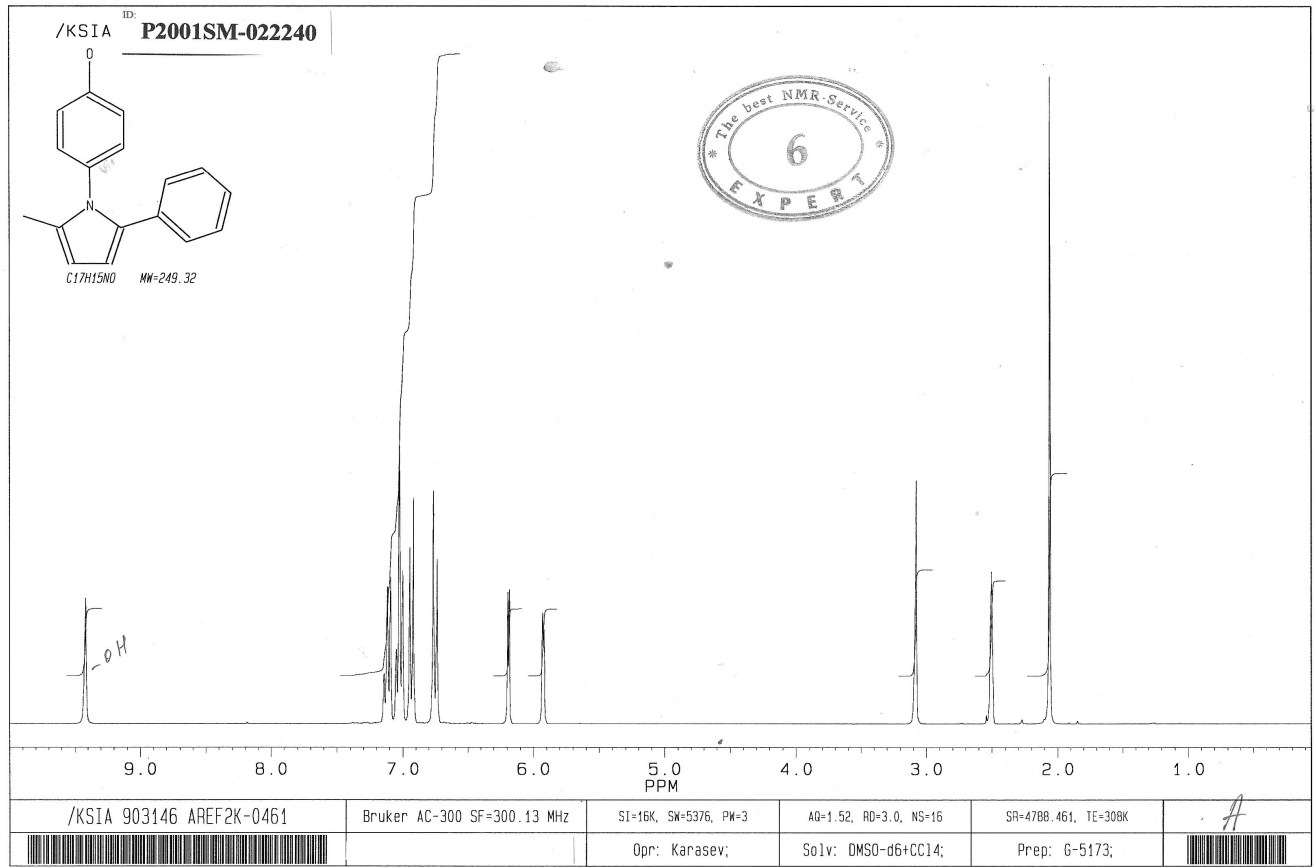

# Compound 6 4-(2,5-diphenyl-1H-pyrrol-1-yl)phenol

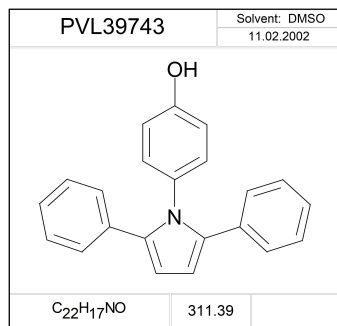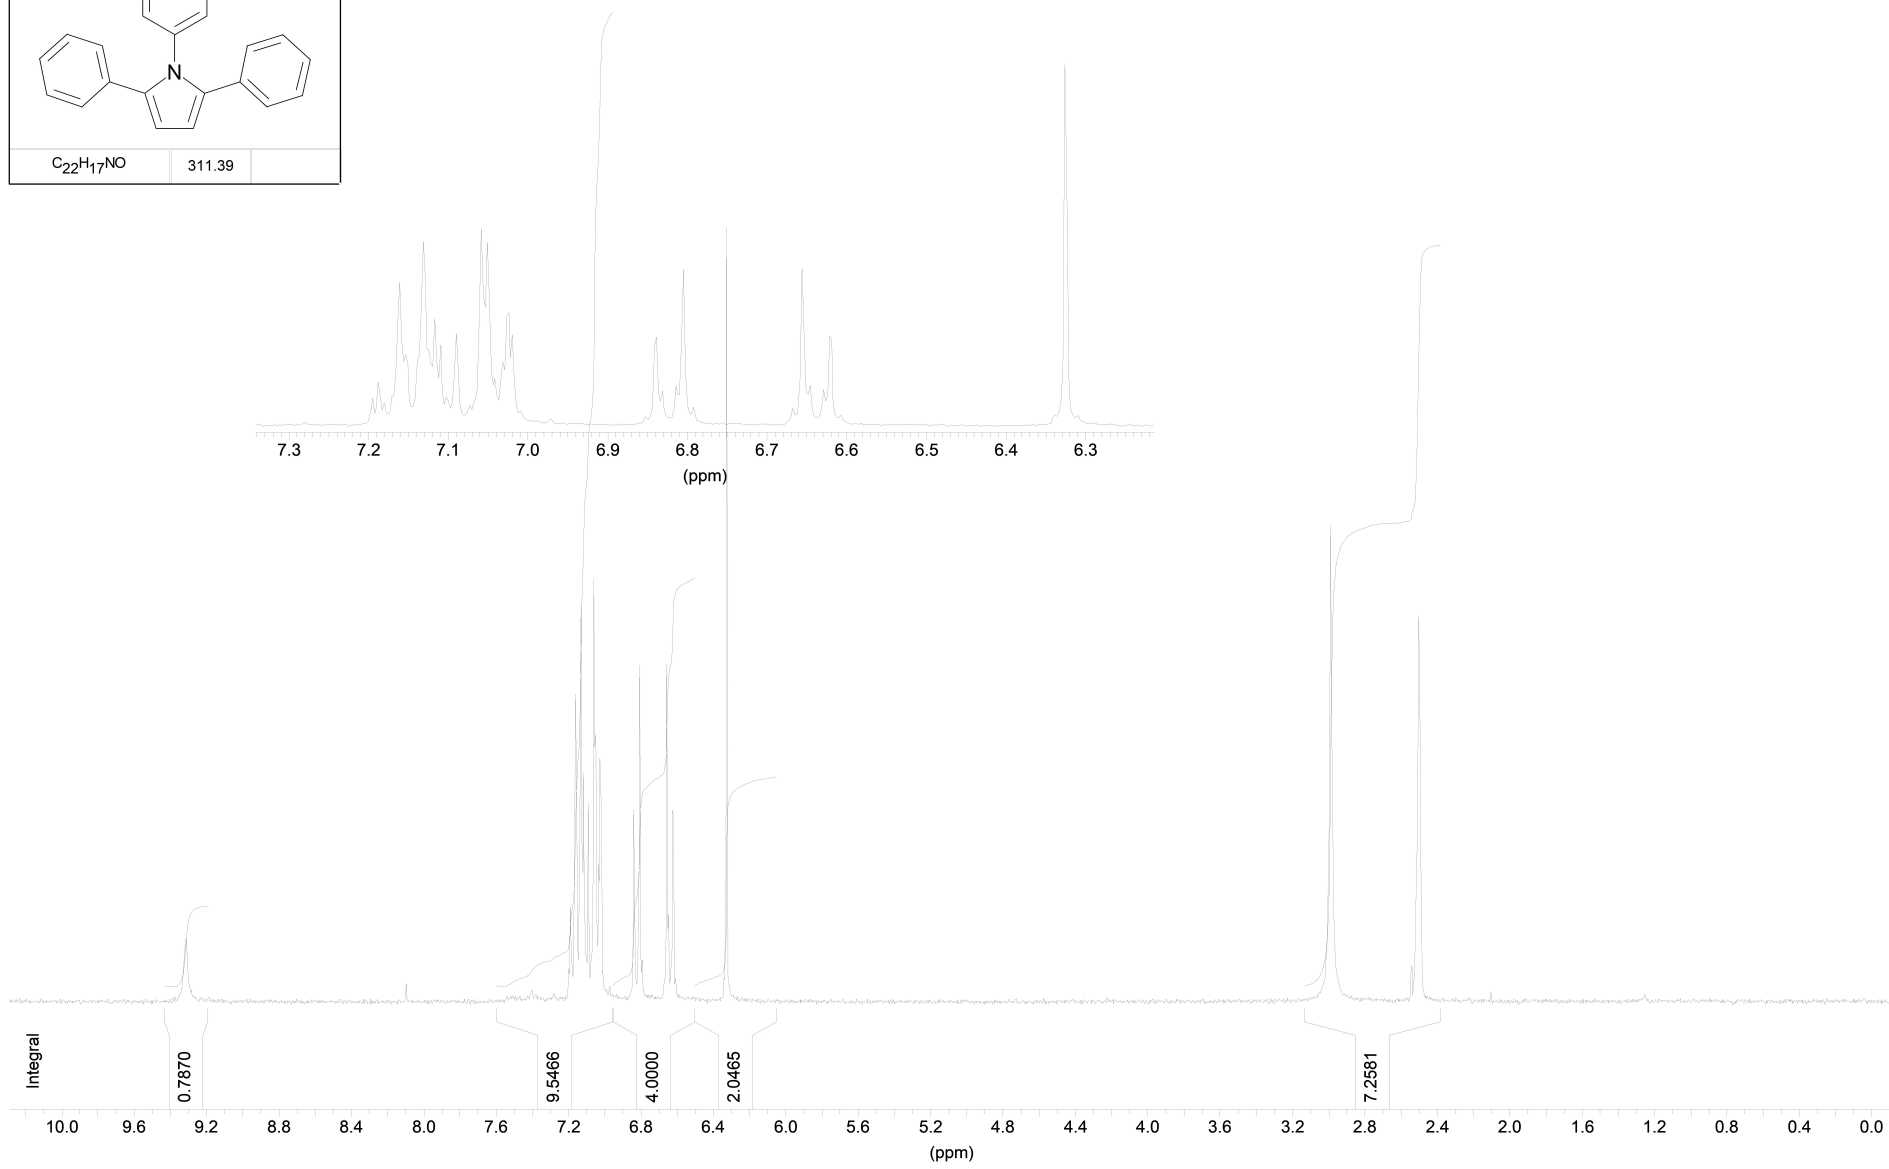

### Compound 7 3-[1-(4-hydroxyphenyl)-5-phenyl-1H-pyrrol-2-yl]propanoic acid

b0343184

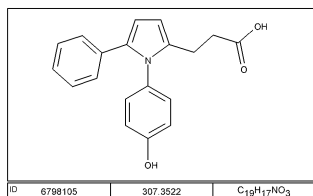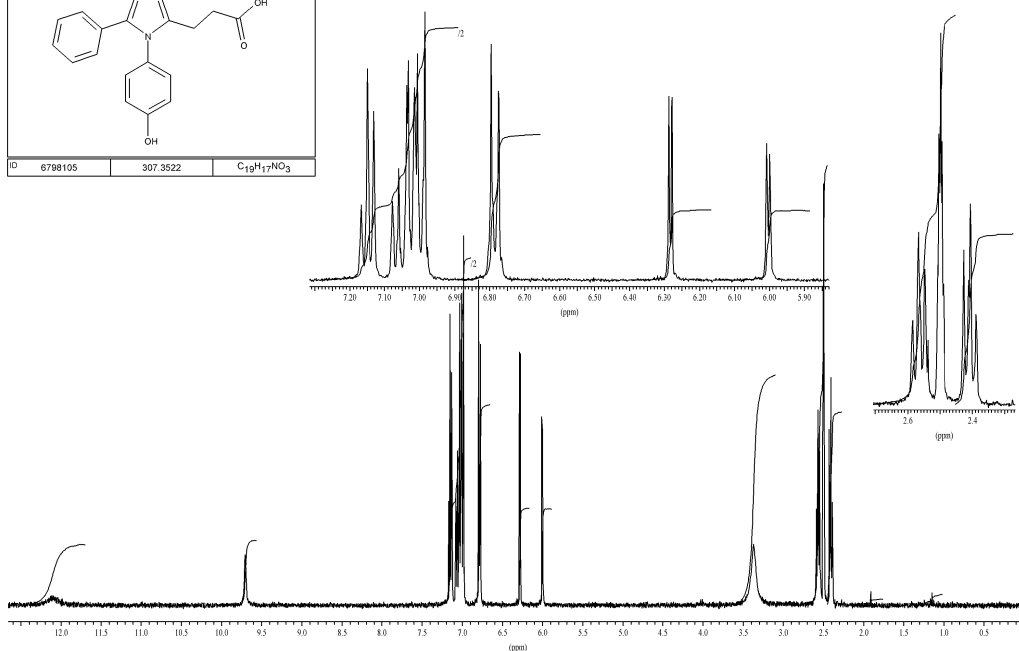

### Compound 8 3-(1-(4-hydroxyphenyl)-5-(4-methoxyphenyl)-1H-pyrrol-2-yl)propanoic acid

b0206433

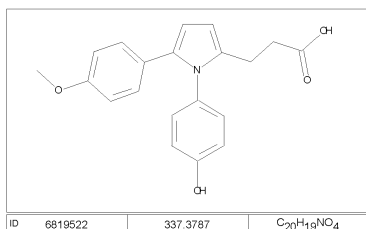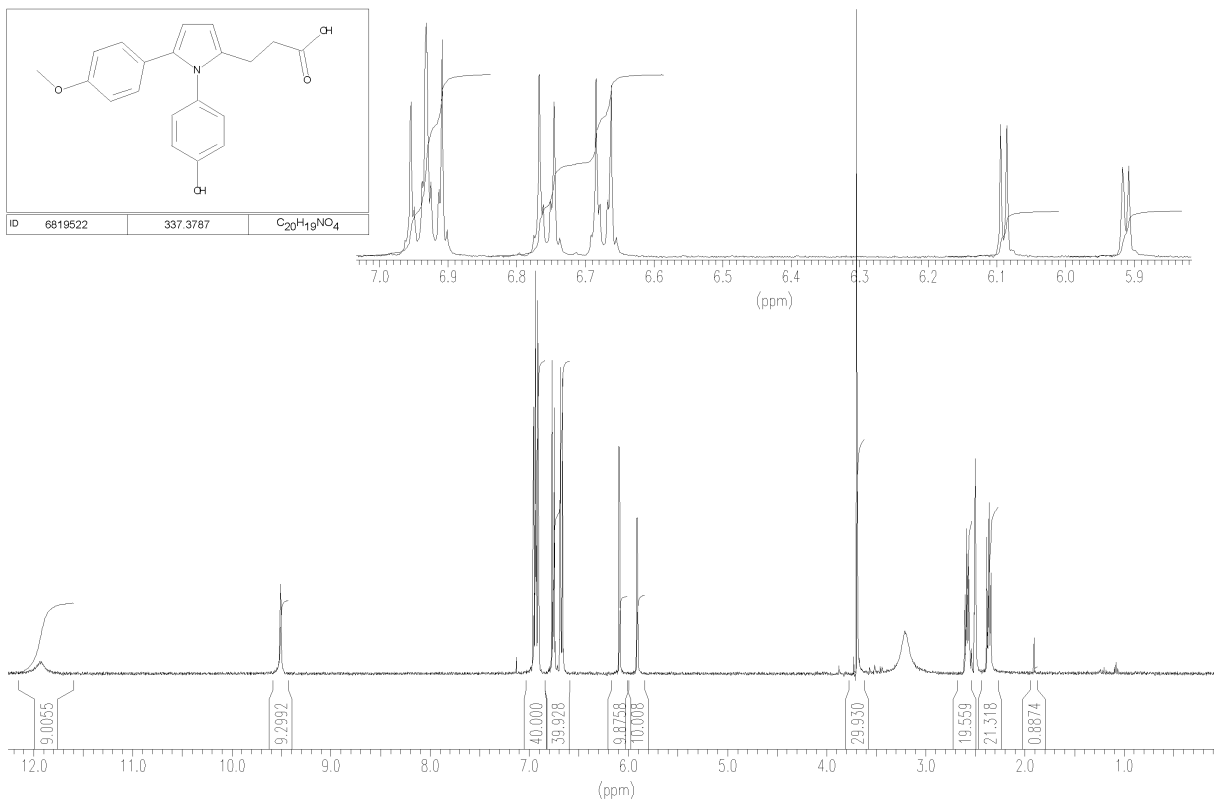

# Compound 9 3-{1-[4-(aminocarbonyl)phenyl]-5-phenyl-1H-pyrrol-2-yl}propanoic acid

B0459922 DMSO-D6/CCL4=2:1 Dsh

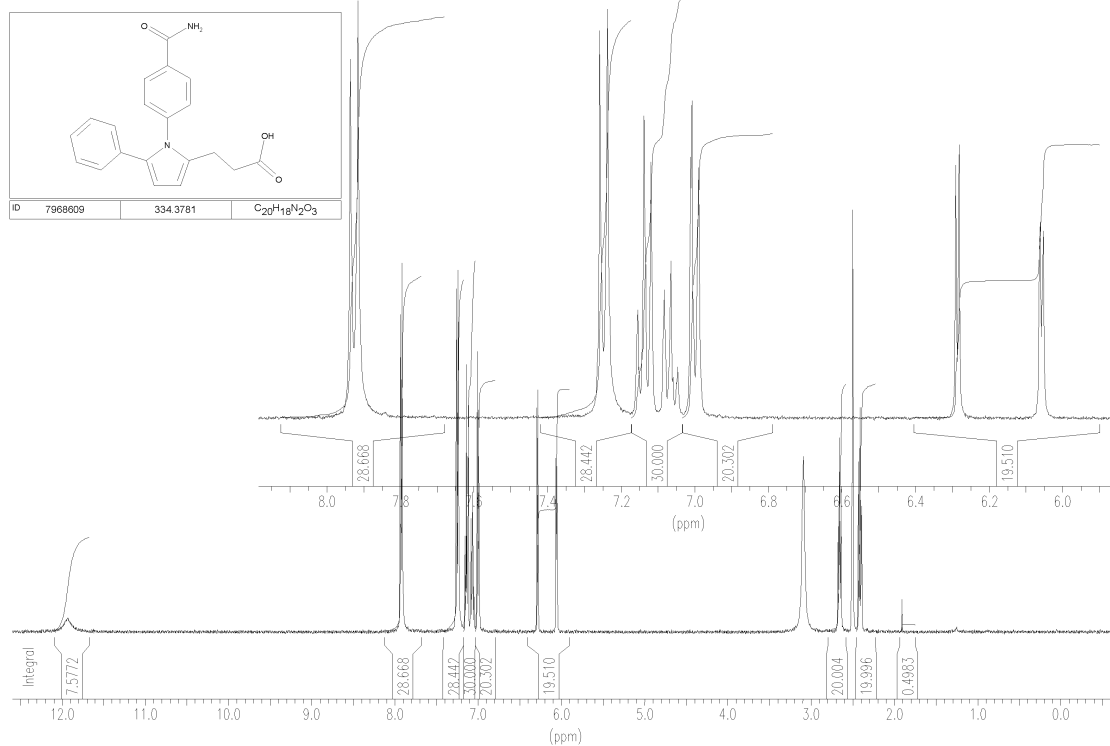



**Compound 10** 3-(1-(4-fluorophenyl)-5-phenyl-1H-pyrrol-2-yl)propanoic acid

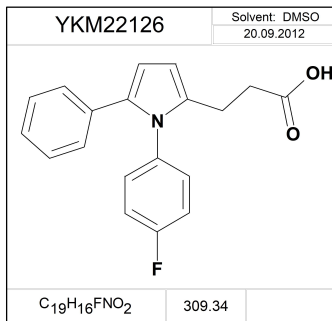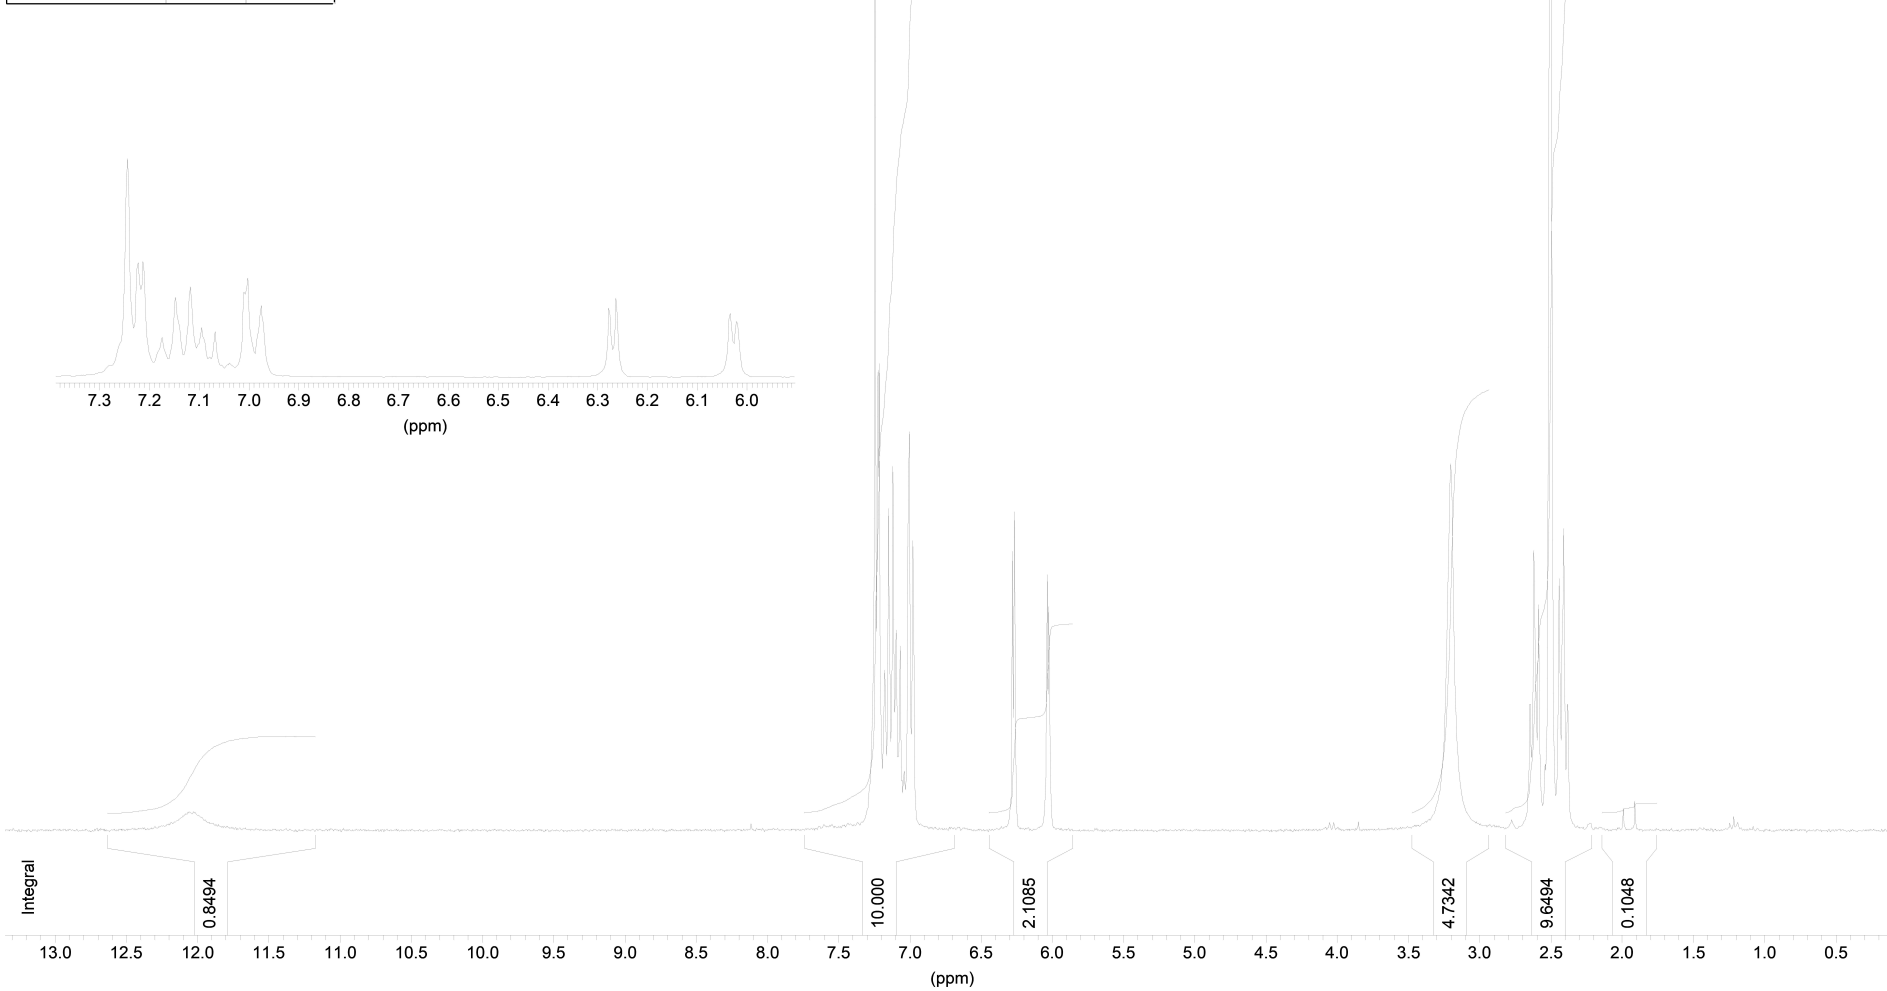

**LC/MS and NMR Confirmation of Author Provided Compound Purity**

**Compound 11** 4-(4-(4-chlorophenyl)-5-methyl-1H-pyrazol-3-yl)benzene-1,2,3-triol

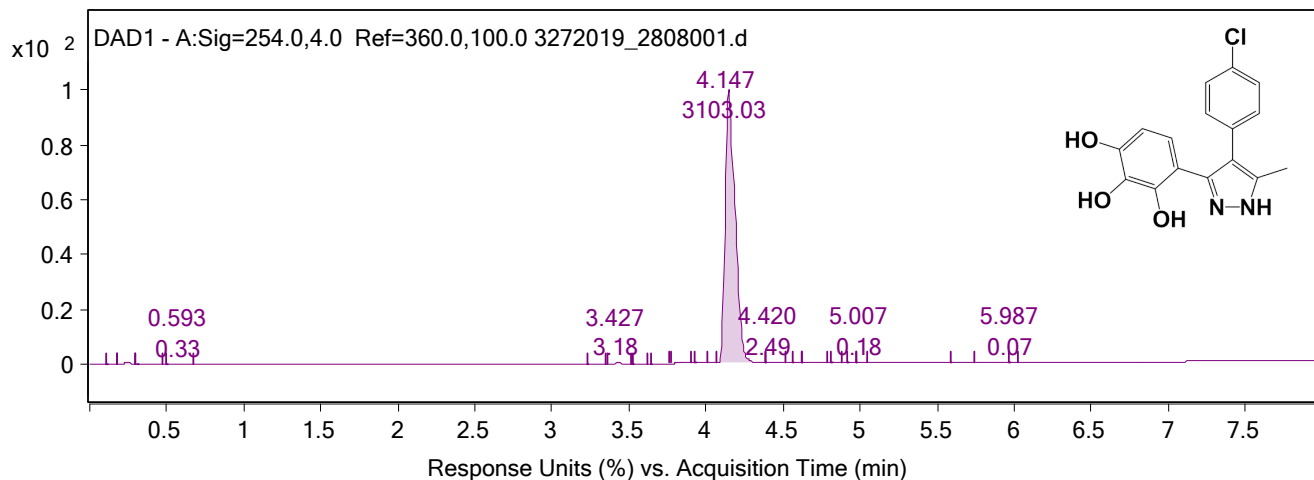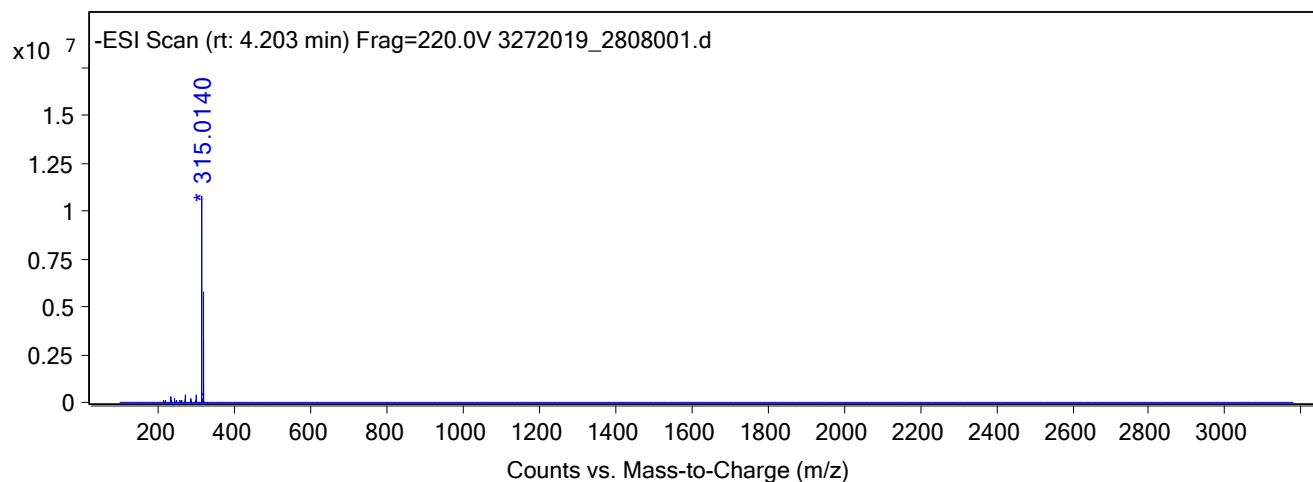

**Integration Peak List**

| Peak | Start | RT    | End   | Height | Area    | Area % |
|------|-------|-------|-------|--------|---------|--------|
| 1    | 0.107 | 0.153 | 0.18  | 0.05   | 0.16    | 0.01   |
| 2    | 0.18  | 0.247 | 0.3   | 7.39   | 19.61   | 0.63   |
| 3    | 0.3   | 0.407 | 0.473 | 0.17   | 1.58    | 0.05   |
| 4    | 0.493 | 0.593 | 0.667 | 0.05   | 0.33    | 0.01   |
| 5    | 3.227 | 3.287 | 3.353 | 0.56   | 2.16    | 0.07   |
| 6    | 3.36  | 3.427 | 3.513 | 0.77   | 3.18    | 0.1    |
| 7    | 3.52  | 3.58  | 3.62  | 0.07   | 0.23    | 0.01   |
| 8    | 3.64  | 3.74  | 3.76  | 0.05   | 0.57    | 0.02   |
| 9    | 3.773 | 3.827 | 3.907 | 0.26   | 1.07    | 0.03   |
| 10   | 3.927 | 3.987 | 4.013 | 0.07   | 0.23    | 0.01   |
| 11   | 4.067 | 4.147 | 4.38  | 685.68 | 3103.03 | 100    |
| 12   | 4.38  | 4.42  | 4.513 | 0.69   | 2.49    | 0.08   |
| 13   | 4.56  | 4.613 | 4.62  | 0.02   | 0.17    | 0.01   |
| 14   | 4.62  | 4.68  | 4.787 | 0.22   | 0.92    | 0.03   |
| 15   | 4.813 | 4.86  | 4.887 | 0.03   | 0.09    | 0      |
| 16   | 4.92  | 4.967 | 4.973 | 0.05   | 0.29    | 0.01   |
| 17   | 4.973 | 5.007 | 5.047 | 0.09   | 0.18    | 0.01   |
| 18   | 5.587 | 5.653 | 5.74  | 0.41   | 1.9     | 0.06   |
| 19   | 5.967 | 5.987 | 6.027 | 0.05   | 0.07    | 0      |

**Peak List**

| m/z      | z | Abund       |
|----------|---|-------------|
| 231.0441 |   | 269037.45   |
| 241.0264 |   | 211992.06   |
| 243.0402 |   | 190152.64   |
| 269.015  |   | 371276.01   |
| 271.0266 |   | 193251.4    |
| 297.004  |   | 390648.24   |
| 315.014  | 1 | 11002248.67 |
| 316.0132 | 1 | 3297760.57  |
| 317.0081 | 1 | 5859798.24  |
| 318.0099 | 1 | 991522.15   |

7.38  
7.36  
7.20  
7.19  
7.17  
6.34  
6.32  
6.29  
6.27

$^1\text{H}$  NMR (400 MHz,  $\text{DMSO-}d_6 + \text{CF}_3\text{SO}_3\text{H}$ )  $\delta$  7.37 (d,  $J = 8.1$  Hz, 3H), 7.18 (d,  $J = 8.1$  Hz, 2H), 6.33 (d,  $J = 8.4$  Hz, 1H), 6.28 (d,  $J = 8.4$  Hz, 1H), 2.32 (s, 3H).

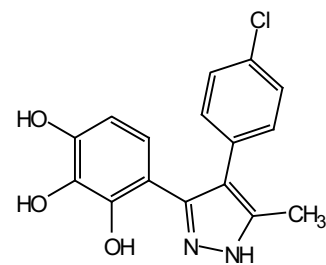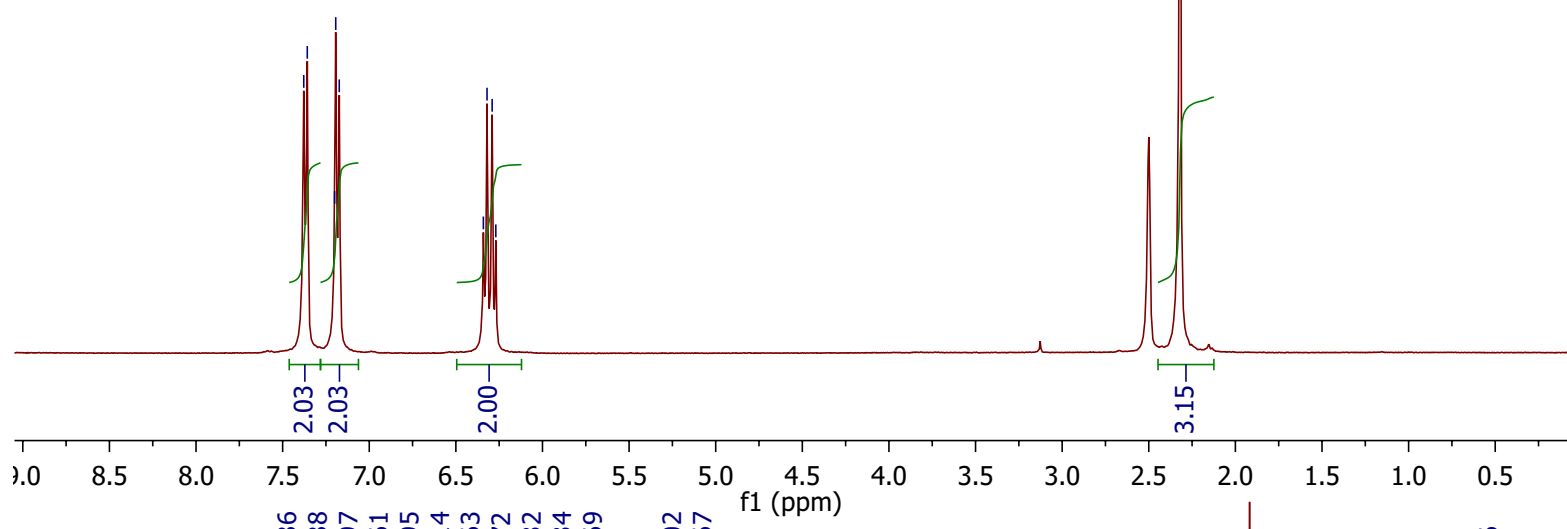

148.86  
145.88  
142.97  
142.61  
133.95  
133.14  
131.63  
129.72  
129.32  
121.34  
118.69  
108.02  
105.67

$^{13}\text{C}$  NMR (100 MHz,  $\text{DMSO-}d_6 + \text{CF}_3\text{SO}_3\text{H}$ ):  $\delta$  148.9, 145.9, 143.0, 142.6, 134.0, 133.1, 131.6, 129.7, 129.3, 121.3, 118.7, 108.0, 105.7, 10.7.

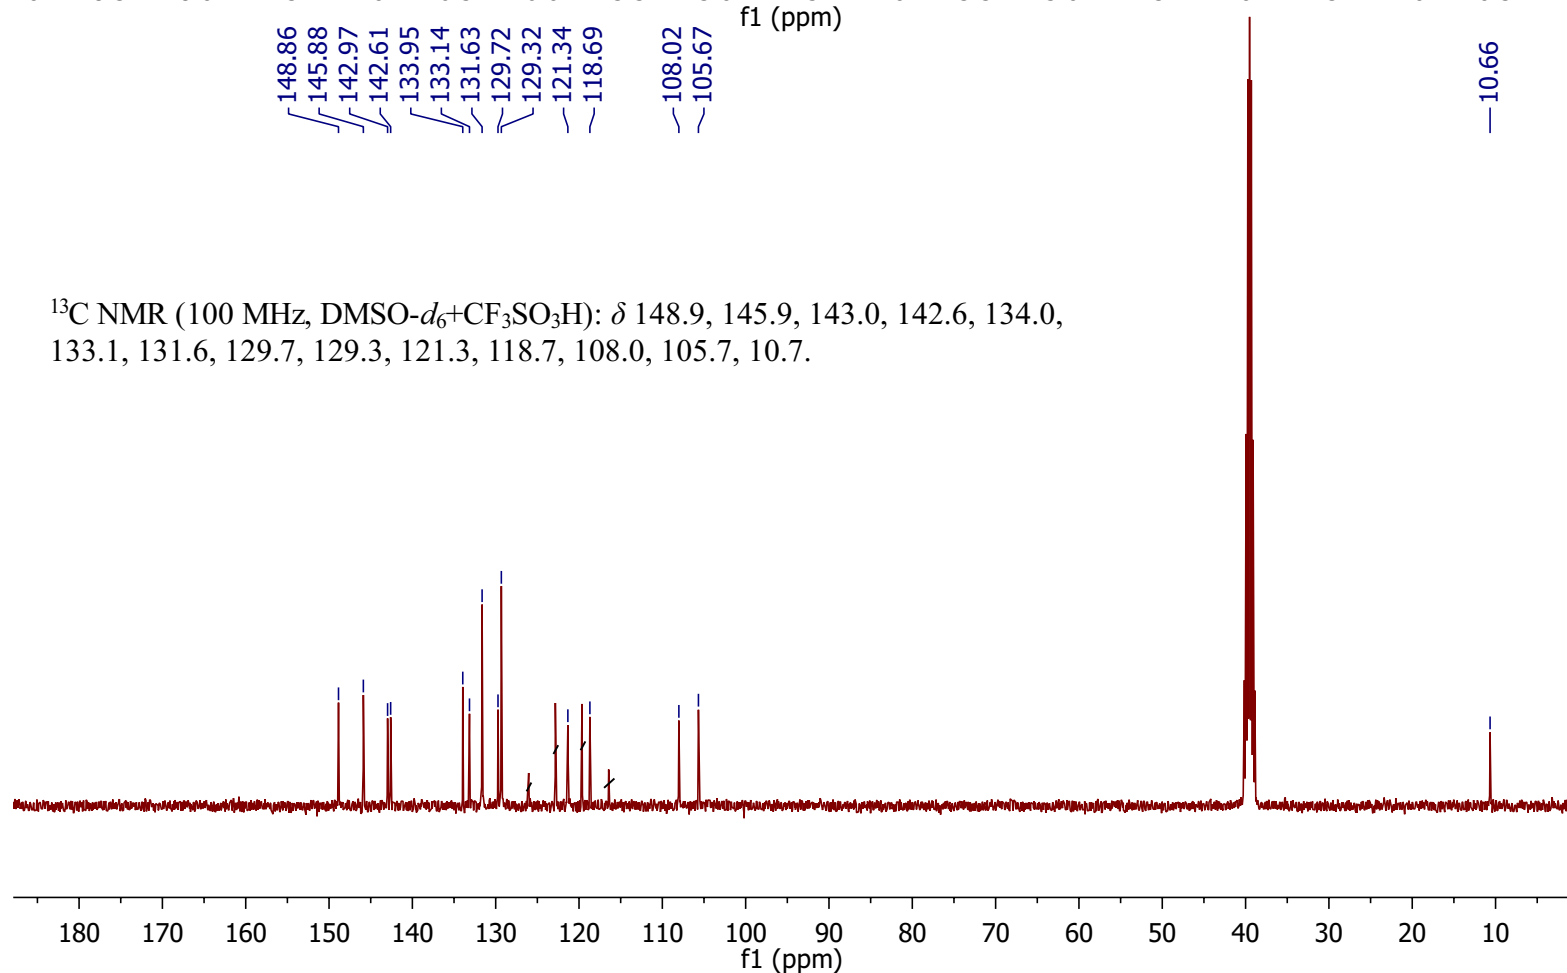

**Compound 12** 4-(4-(3,4-dichlorophenyl)-5-methyl-1H-pyrazol-3-yl)benzene-1,2,3-triol

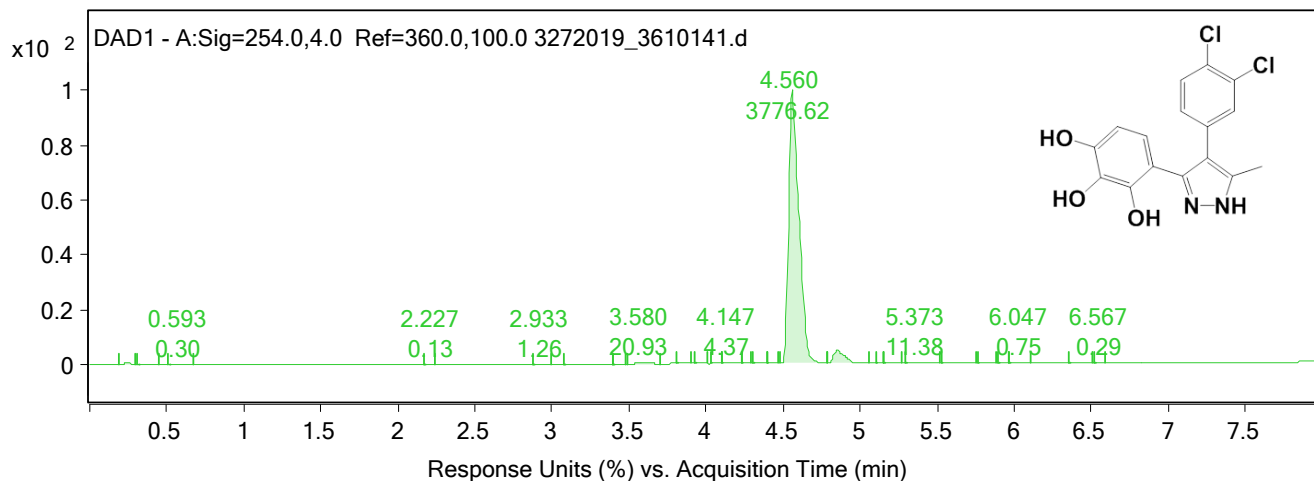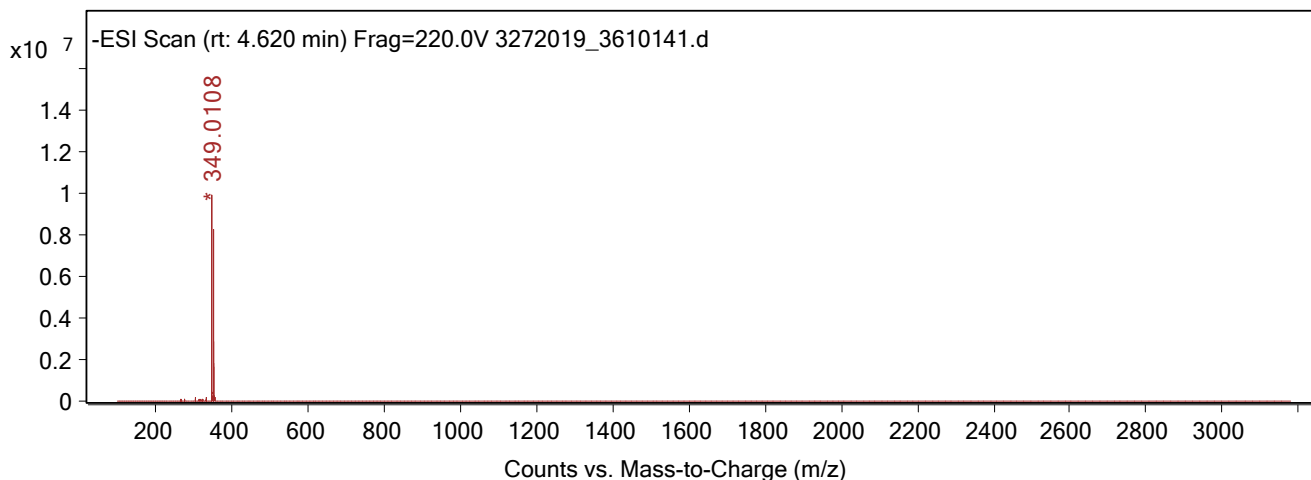

**Integration Peak List**

| Peak | Start | RT    | End   | Height | Area    | Area % |
|------|-------|-------|-------|--------|---------|--------|
| 1    | 0.193 | 0.247 | 0.3   | 8.56   | 22.59   | 0.6    |
| 2    | 0.307 | 0.427 | 0.447 | 0.06   | 1.12    | 0.03   |
| 3    | 0.507 | 0.593 | 0.667 | 0.05   | 0.3     | 0.01   |
| 4    | 2.167 | 2.227 | 2.24  | 0.03   | 0.13    | 0      |
| 5    | 2.88  | 2.933 | 2.993 | 0.34   | 1.26    | 0.03   |
| 6    | 3.08  | 3.24  | 3.393 | 0.55   | 5.16    | 0.14   |
| 7    | 3.4   | 3.453 | 3.48  | 0.08   | 0.29    | 0.01   |
| 8    | 3.487 | 3.58  | 3.7   | 4.74   | 20.93   | 0.55   |
| 9    | 3.807 | 3.847 | 3.9   | 0.72   | 1.65    | 0.04   |
| 10   | 3.927 | 3.967 | 4.013 | 0.15   | 0.38    | 0.01   |
| 11   | 4.027 | 4.073 | 4.1   | 0.42   | 1.16    | 0.03   |
| 12   | 4.1   | 4.147 | 4.227 | 1.23   | 4.37    | 0.12   |
| 13   | 4.227 | 4.26  | 4.293 | 0.16   | 0.32    | 0.01   |
| 14   | 4.307 | 4.353 | 4.393 | 0.79   | 2.22    | 0.06   |
| 15   | 4.393 | 4.413 | 4.467 | 0.17   | 0.38    | 0.01   |
| 16   | 4.48  | 4.56  | 4.787 | 819.09 | 3776.62 | 100    |
| 17   | 4.787 | 4.853 | 5.053 | 39.34  | 180.56  | 4.78   |
| 18   | 5.1   | 5.147 | 5.153 | 0.01   | 0.1     | 0      |
| 19   | 5.153 | 5.193 | 5.267 | 0.08   | 0.28    | 0.01   |
| 20   | 5.293 | 5.373 | 5.513 | 1.96   | 11.38   | 0.3    |
| 21   | 5.527 | 5.647 | 5.753 | 1.36   | 7.93    | 0.21   |
| 22   | 5.76  | 5.84  | 5.88  | 0.17   | 0.68    | 0.02   |
| 23   | 5.893 | 5.94  | 5.96  | 0.14   | 0.41    | 0.01   |
| 24   | 5.967 | 6.047 | 6.107 | 0.21   | 0.75    | 0.02   |
| 25   | 6.353 | 6.413 | 6.507 | 0.19   | 0.76    | 0.02   |
| 26   | 6.52  | 6.567 | 6.593 | 0.09   | 0.29    | 0.01   |

**Peak List**

| m/z      | z | Abund       |
|----------|---|-------------|
| 303.0067 |   | 149841.92   |
| 330.999  |   | 186215.15   |
| 332.9958 |   | 114189.77   |
| 346.9918 |   | 150421.24   |
| 349.0108 | 1 | 10088382.55 |
| 350.0103 | 1 | 2922728.3   |
| 351.0066 | 1 | 8262324.06  |
| 352.0072 | 1 | 1806358.41  |
| 353.0019 | 1 | 1719293.47  |
| 354.0051 | 1 | 265719.67   |

7.55  
7.53  
7.41  
7.16  
7.13  
6.40  
6.38  
6.34  
6.32

$^1\text{H}$  NMR (400 MHz,  $\text{DMSO-}d_6+\text{CF}_3\text{SO}_3\text{H}$ ):  $\delta$  7.54 (d,  $J = 8.4$  Hz, 1H), 7.41 (s, 1H), 7.14 (d,  $J = 8.4$  Hz, 1H), 6.39 (d,  $J = 8.3$  Hz, 1H), 6.33 (d,  $J = 8.3$  Hz, 1H), 2.35 (s, 3H).

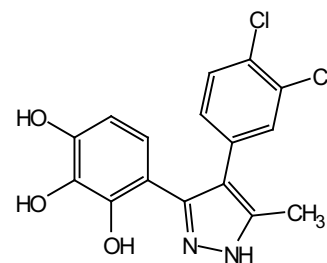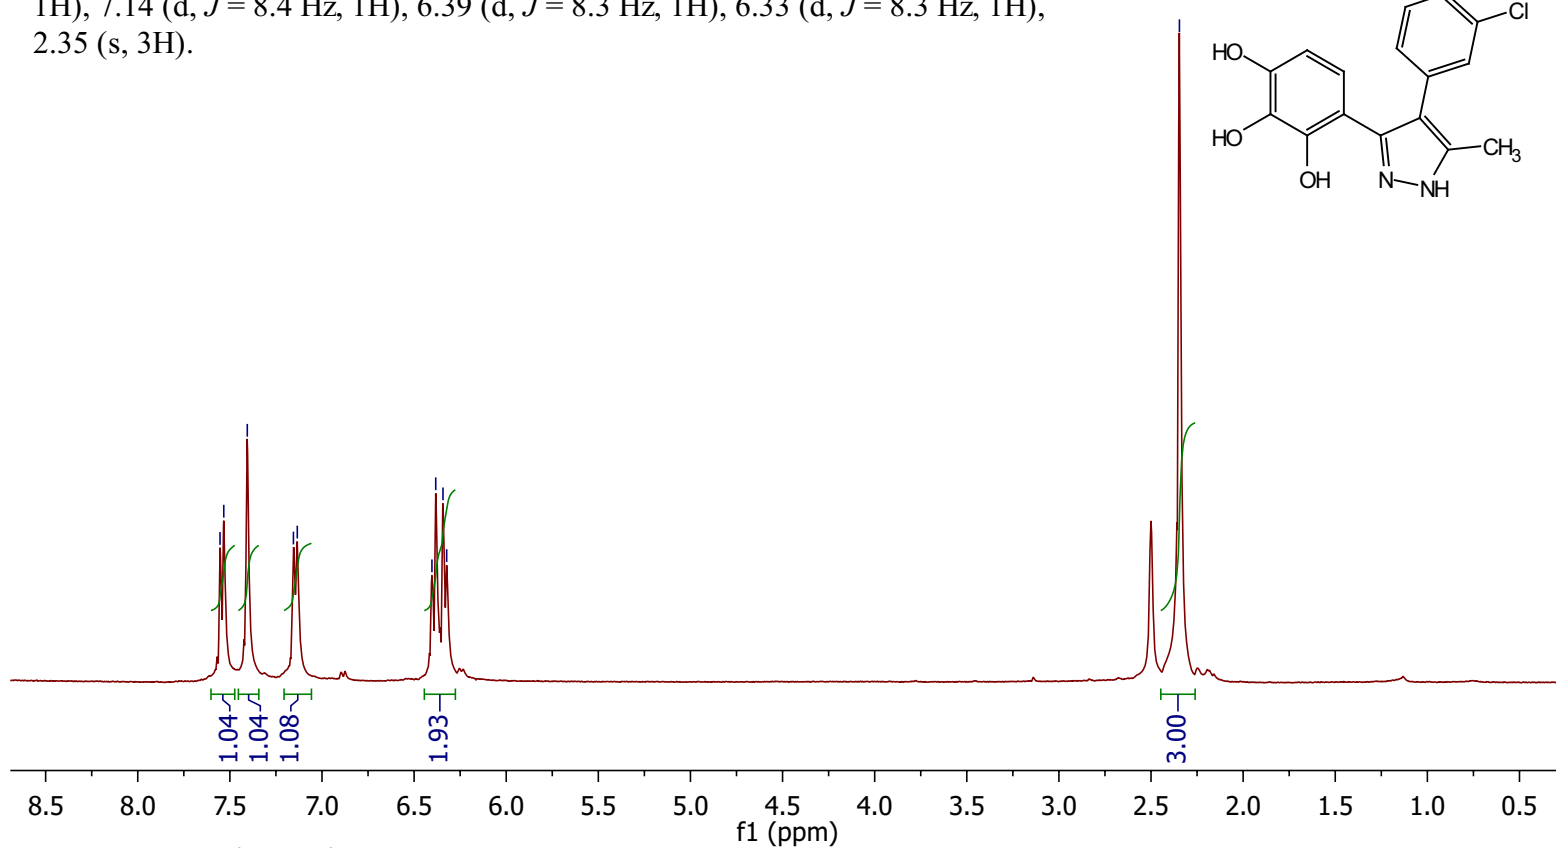

148.78  
145.64  
143.00  
142.73  
133.84  
131.76  
131.65  
131.20  
130.92  
129.88  
121.09  
117.35  
107.94  
105.37

$^{13}\text{C}$  NMR (100 MHz,  $\text{DMSO-}d_6+\text{CF}_3\text{SO}_3\text{H}$ ):  $\delta$  148.8, 145.6, 143.0, 142.7, 133.8, 131.8, 131.6, 131.2, 130.9, 129.9, 121.1, 117.3, 107.9, 105.4, 10.5.

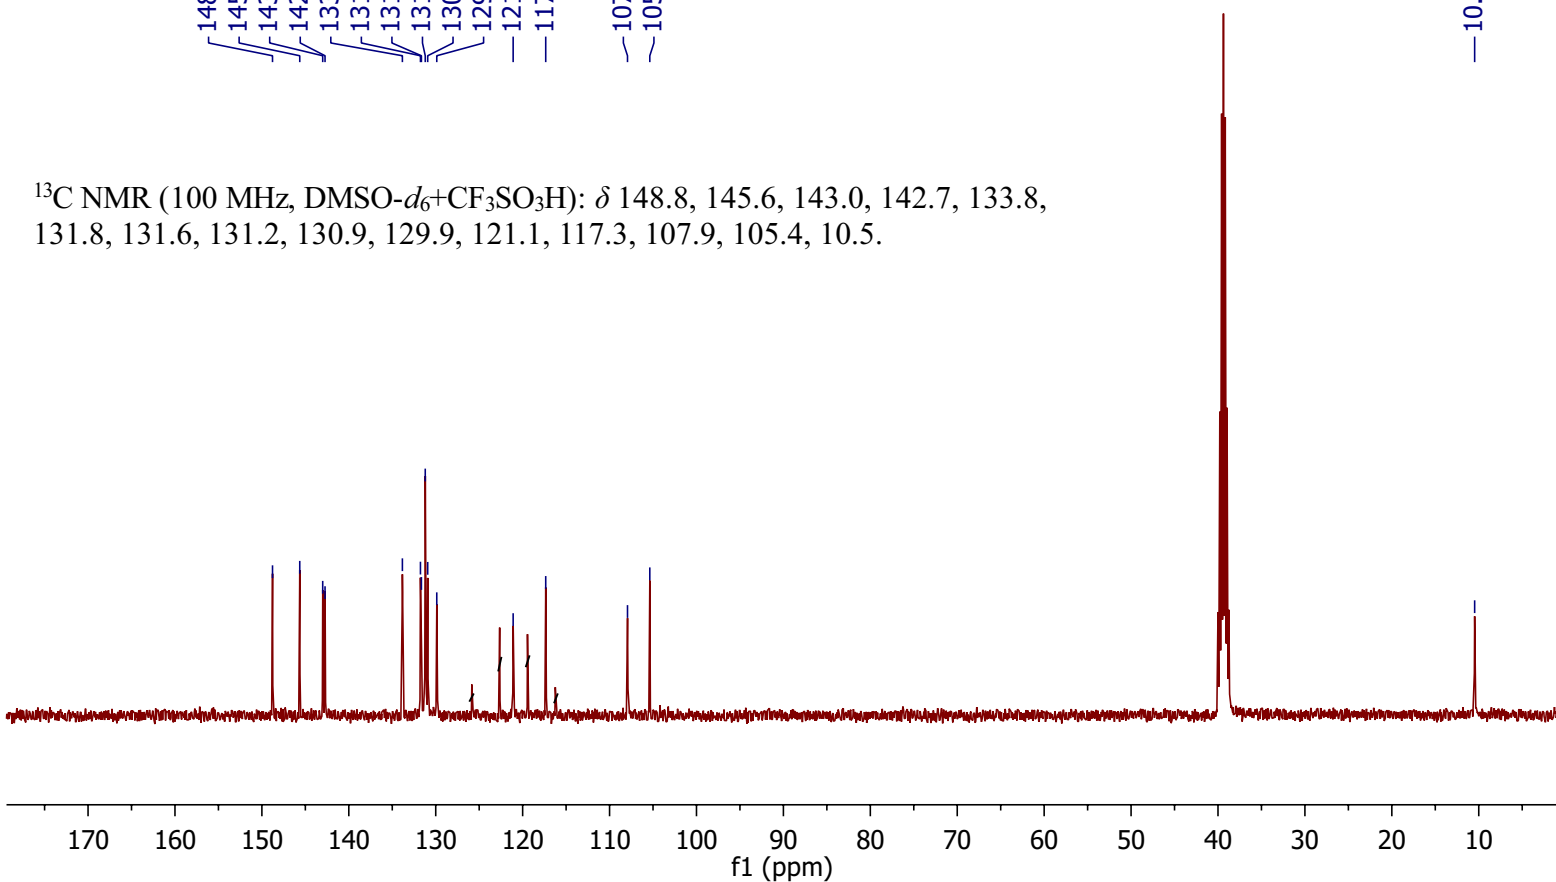

**Compound 13** 4-(4-(4-chlorophenyl)-1H-pyrazol-3-yl)benzene-1,2,3-triol

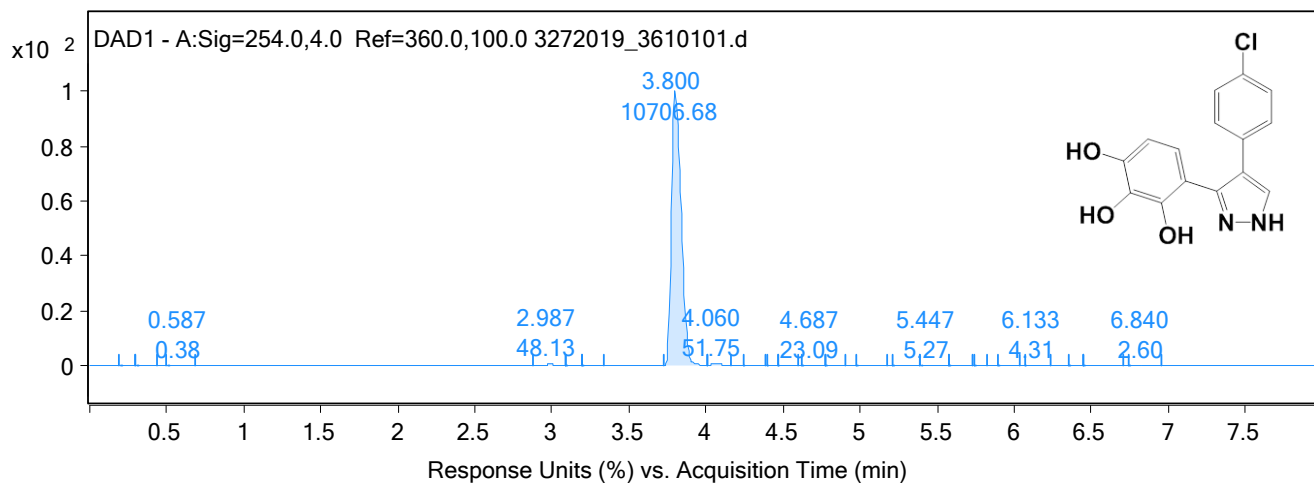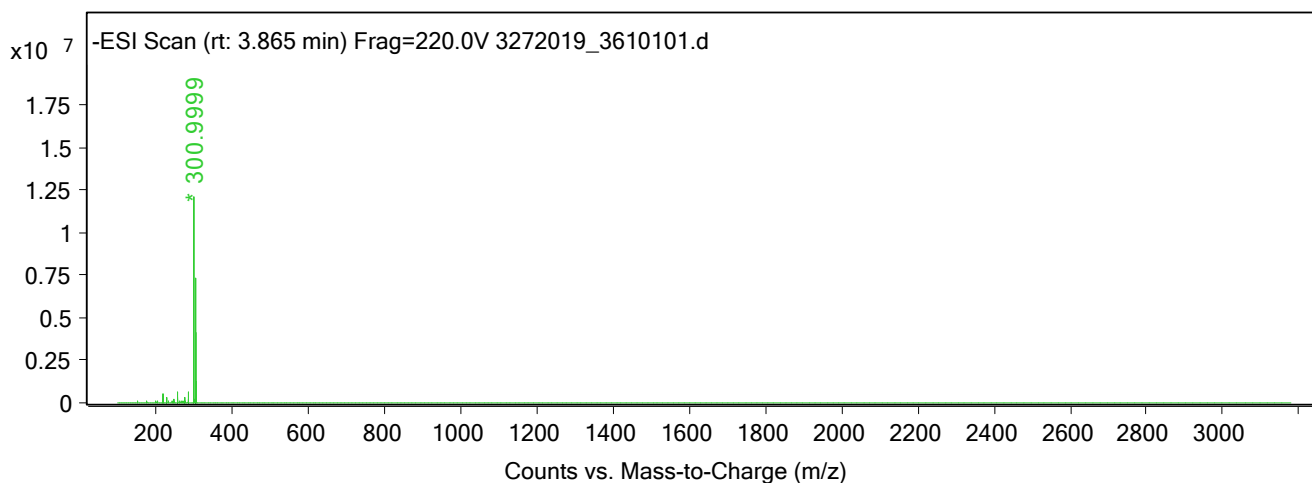

**Integration Peak List**

| Peak | Start | RT    | End   | Height  | Area     | Area % |
|------|-------|-------|-------|---------|----------|--------|
| 1    | 0.193 | 0.247 | 0.3   | 10.05   | 26.84    | 0.25   |
| 2    | 0.3   | 0.427 | 0.44  | 0.04    | 1.09     | 0.01   |
| 3    | 0.5   | 0.587 | 0.68  | 0.06    | 0.38     | 0      |
| 4    | 2.88  | 2.987 | 3.087 | 13.51   | 48.13    | 0.45   |
| 5    | 3.093 | 3.147 | 3.2   | 0.48    | 1.78     | 0.02   |
| 6    | 3.2   | 3.253 | 3.333 | 0.74    | 2.77     | 0.03   |
| 7    | 3.72  | 3.8   | 4.007 | 2439.48 | 10706.68 | 100    |
| 8    | 4.007 | 4.06  | 4.167 | 12.61   | 51.75    | 0.48   |
| 9    | 4.24  | 4.293 | 4.38  | 0.34    | 1.39     | 0.01   |
| 10   | 4.393 | 4.44  | 4.467 | 1.44    | 3.97     | 0.04   |
| 11   | 4.467 | 4.5   | 4.6   | 1.7     | 5.76     | 0.05   |
| 12   | 4.627 | 4.687 | 4.773 | 5.83    | 23.09    | 0.22   |
| 13   | 4.773 | 4.813 | 4.907 | 1.06    | 3.39     | 0.03   |
| 14   | 4.98  | 5.04  | 5.173 | 0.94    | 4.76     | 0.04   |
| 15   | 5.213 | 5.313 | 5.387 | 0.33    | 1.57     | 0.01   |
| 16   | 5.393 | 5.447 | 5.58  | 1.02    | 5.27     | 0.05   |
| 17   | 5.58  | 5.66  | 5.727 | 0.24    | 1.08     | 0.01   |
| 18   | 5.747 | 5.793 | 5.827 | 0.24    | 0.76     | 0.01   |
| 19   | 5.893 | 5.947 | 6.04  | 0.3     | 1.29     | 0.01   |
| 20   | 6.067 | 6.133 | 6.233 | 0.95    | 4.31     | 0.04   |
| 21   | 6.353 | 6.4   | 6.447 | 0.09    | 0.25     | 0      |
| 22   | 6.453 | 6.533 | 6.713 | 0.36    | 2.51     | 0.02   |
| 23   | 6.747 | 6.84  | 6.96  | 0.46    | 2.6      | 0.02   |

**Peak List**

| m/z      | z | Abund       |
|----------|---|-------------|
| 217.0289 |   | 538604.84   |
| 227.0113 |   | 370946.89   |
| 229.026  |   | 371259.43   |
| 254.9999 |   | 656336.18   |
| 257.0114 |   | 346231.5    |
| 282.9884 |   | 688054.06   |
| 300.9999 | 1 | 12446481.28 |
| 301.9981 | 1 | 4232733.55  |
| 302.9936 | 1 | 7457097.47  |
| 303.9947 | 1 | 1317845.02  |

—8.57

7.33  
7.32  
7.30  
7.29

6.50  
6.48  
6.40  
6.39

$^1\text{H}$  NMR (500 MHz,  $\text{DMSO-}d_6+\text{CF}_3\text{SO}_3\text{H}$ ):  $\delta$  8.57 (s, 1H), 7.40 – 7.23 (m, 4H), 6.49 (d,  $J = 8.4$  Hz, 1H), 6.39 (d,  $J = 8.4$  Hz, 1H).

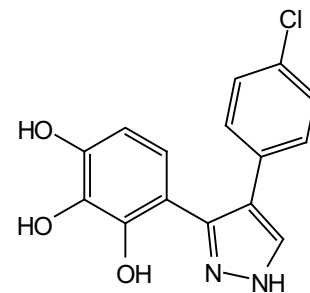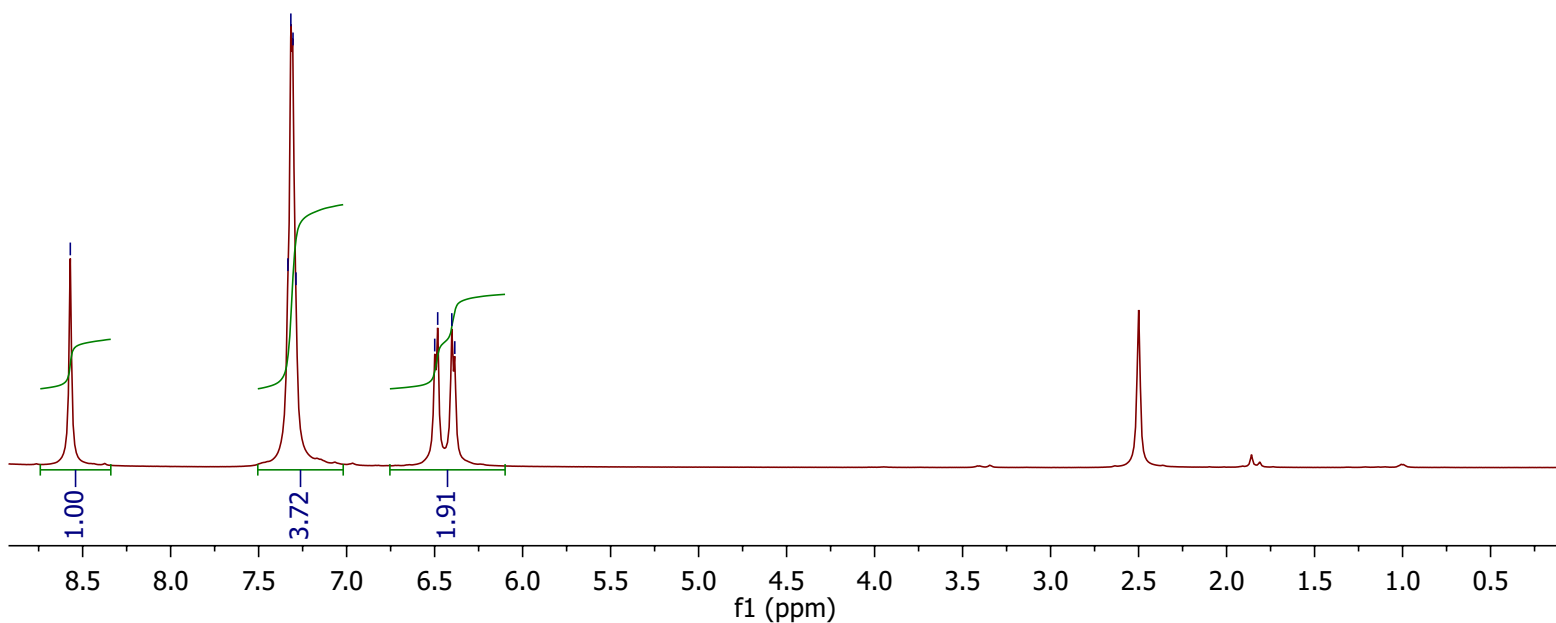

148.91  
145.81  
141.79  
134.11  
133.21  
132.86  
130.03  
129.49  
129.24  
121.26  
120.29

108.21  
105.97

$^{13}\text{C}$  NMR (125 MHz,  $\text{DMSO-}d_6+\text{CF}_3\text{SO}_3\text{H}$ ):  $\delta$  148.9, 145.8, 141.8, 134.1, 133.2, 132.9, 130.0, 129.5, 129.2, 121.3, 120.3, 108.2, 106.0.

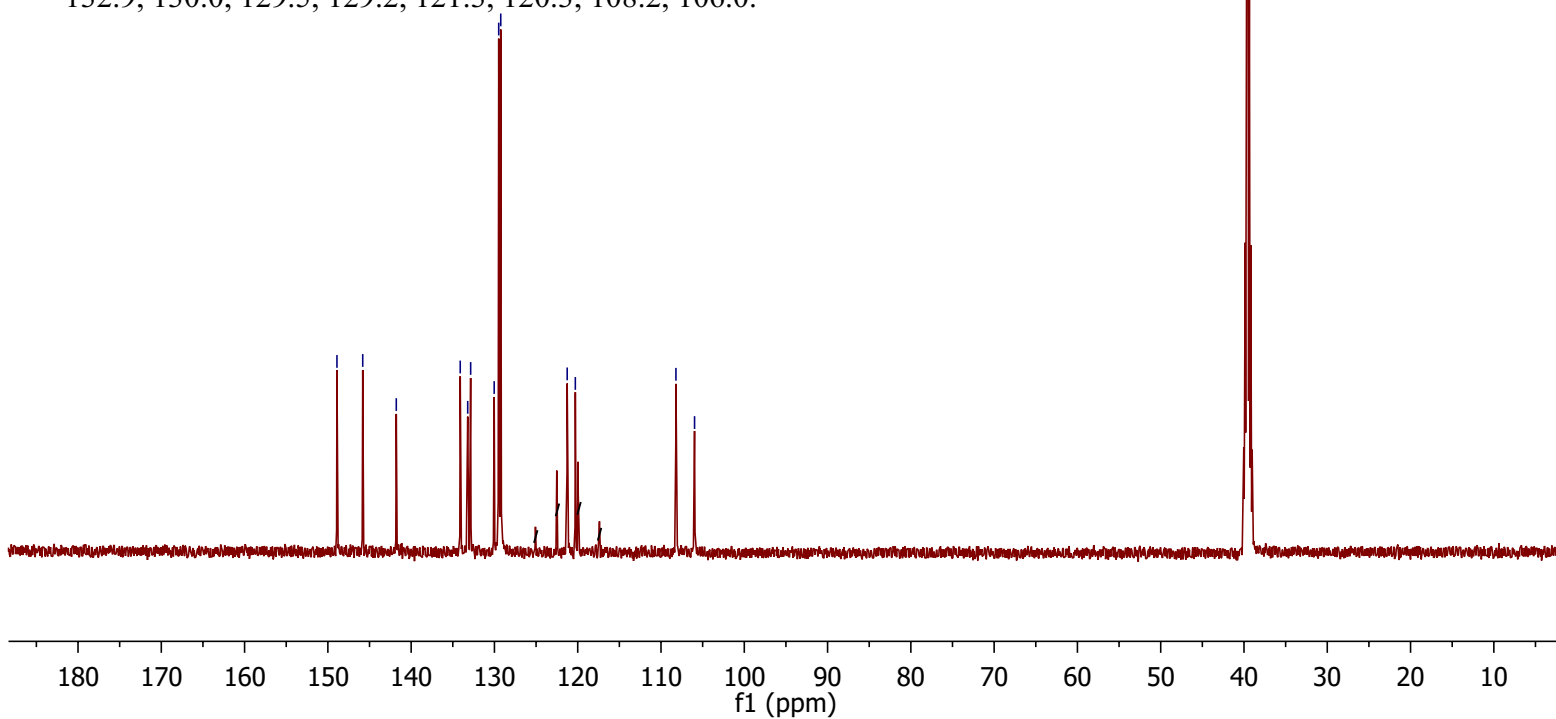



**Compound 14** 4-(4-(3,4-dichlorophenyl)-1H-pyrazol-3-yl)benzene-1,2,3-triol

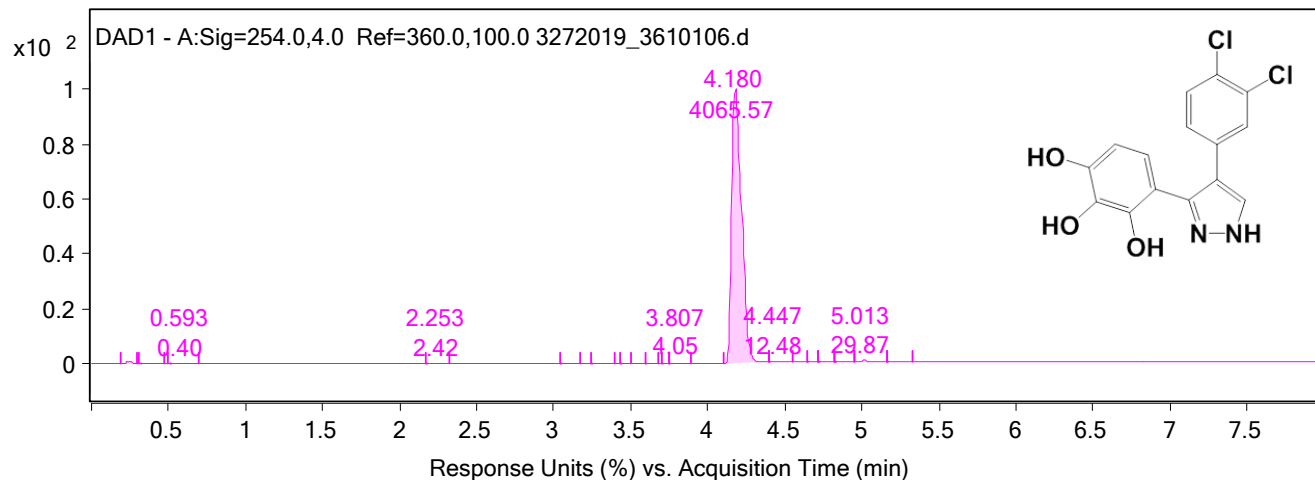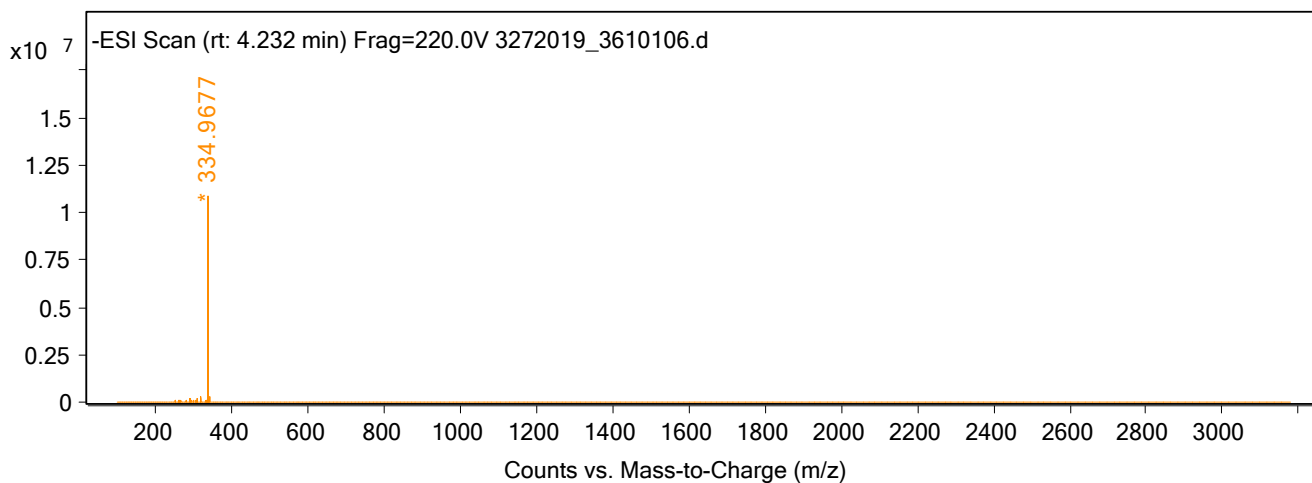

**Integration Peak List**

| Peak | Start | RT    | End   | Height | Area    | Area % |
|------|-------|-------|-------|--------|---------|--------|
| 1    | 0.193 | 0.247 | 0.3   | 8.66   | 22.86   | 0.56   |
| 2    | 0.307 | 0.427 | 0.467 | 0.11   | 1.37    | 0.03   |
| 3    | 0.5   | 0.593 | 0.7   | 0.06   | 0.4     | 0.01   |
| 4    | 2.167 | 2.253 | 2.32  | 0.71   | 2.42    | 0.06   |
| 5    | 3.047 | 3.1   | 3.173 | 0.32   | 1.17    | 0.03   |
| 6    | 3.247 | 3.307 | 3.393 | 1.47   | 5.4     | 0.13   |
| 7    | 3.433 | 3.487 | 3.507 | 0.03   | 0.13    | 0      |
| 8    | 3.593 | 3.647 | 3.68  | 0.16   | 0.61    | 0.02   |
| 9    | 3.7   | 3.74  | 3.747 | 0.03   | 0.16    | 0      |
| 10   | 3.747 | 3.807 | 3.893 | 1.06   | 4.05    | 0.1    |
| 11   | 4.1   | 4.18  | 4.393 | 915.66 | 4065.57 | 100    |
| 12   | 4.393 | 4.447 | 4.553 | 3.07   | 12.48   | 0.31   |
| 13   | 4.64  | 4.687 | 4.72  | 0.16   | 0.47    | 0.01   |
| 14   | 4.72  | 4.76  | 4.82  | 0.32   | 0.89    | 0.02   |
| 15   | 4.827 | 4.873 | 4.947 | 0.13   | 0.55    | 0.01   |
| 16   | 4.947 | 5.013 | 5.16  | 6.53   | 29.87   | 0.73   |
| 17   | 5.16  | 5.22  | 5.333 | 0.6    | 2.79    | 0.07   |

**Peak List**

| m/z      | z | Abund       |
|----------|---|-------------|
| 288.9671 |   | 228372.93   |
| 306.9715 |   | 157705.38   |
| 316.957  |   | 254604.44   |
| 318.9535 |   | 164198.37   |
| 334.9677 | 1 | 10928833.84 |
| 335.9666 | 1 | 3373529.94  |
| 336.9633 | 1 | 9237528.31  |
| 337.9632 | 1 | 2099643.52  |
| 338.9578 | 1 | 2045474.69  |
| 339.9609 | 1 | 297916.63   |

$^1\text{H}$  NMR (500 MHz,  $\text{DMSO-}d_6+\text{CF}_3\text{SO}_3\text{H}$ ):  $\delta$  8.60 (s, 1H), 7.54 – 7.51 (m, 1H), 7.49 (d,  $J = 8.5$  Hz, 1H), 7.22 (d,  $J = 8.5$  Hz, 1H), 6.52 (d,  $J = 8.4$  Hz, 1H), 6.42 (d,  $J = 8.4$  Hz, 1H).

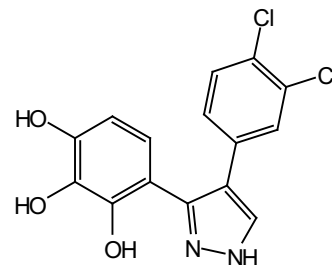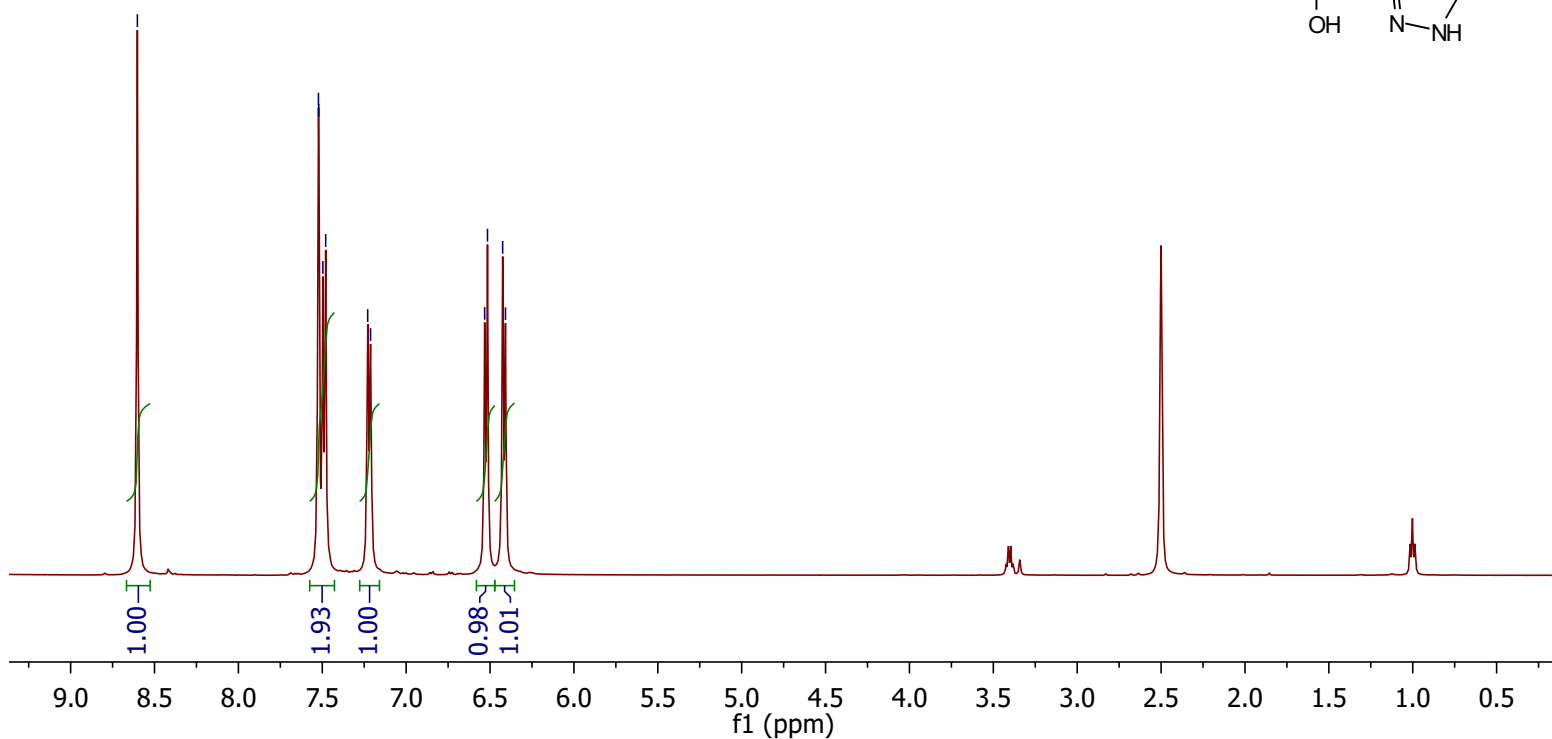

$^{13}\text{C}$  NMR (125 MHz,  $\text{DMSO-}d_6+\text{CF}_3\text{SO}_3\text{H}$ ):  $\delta$  149.0, 145.8, 142.0, 134.2, 133.7, 132.2, 132.0, 131.3, 130.6, 129.3, 127.7, 121.2, 118.9, 108.3, 106.0.

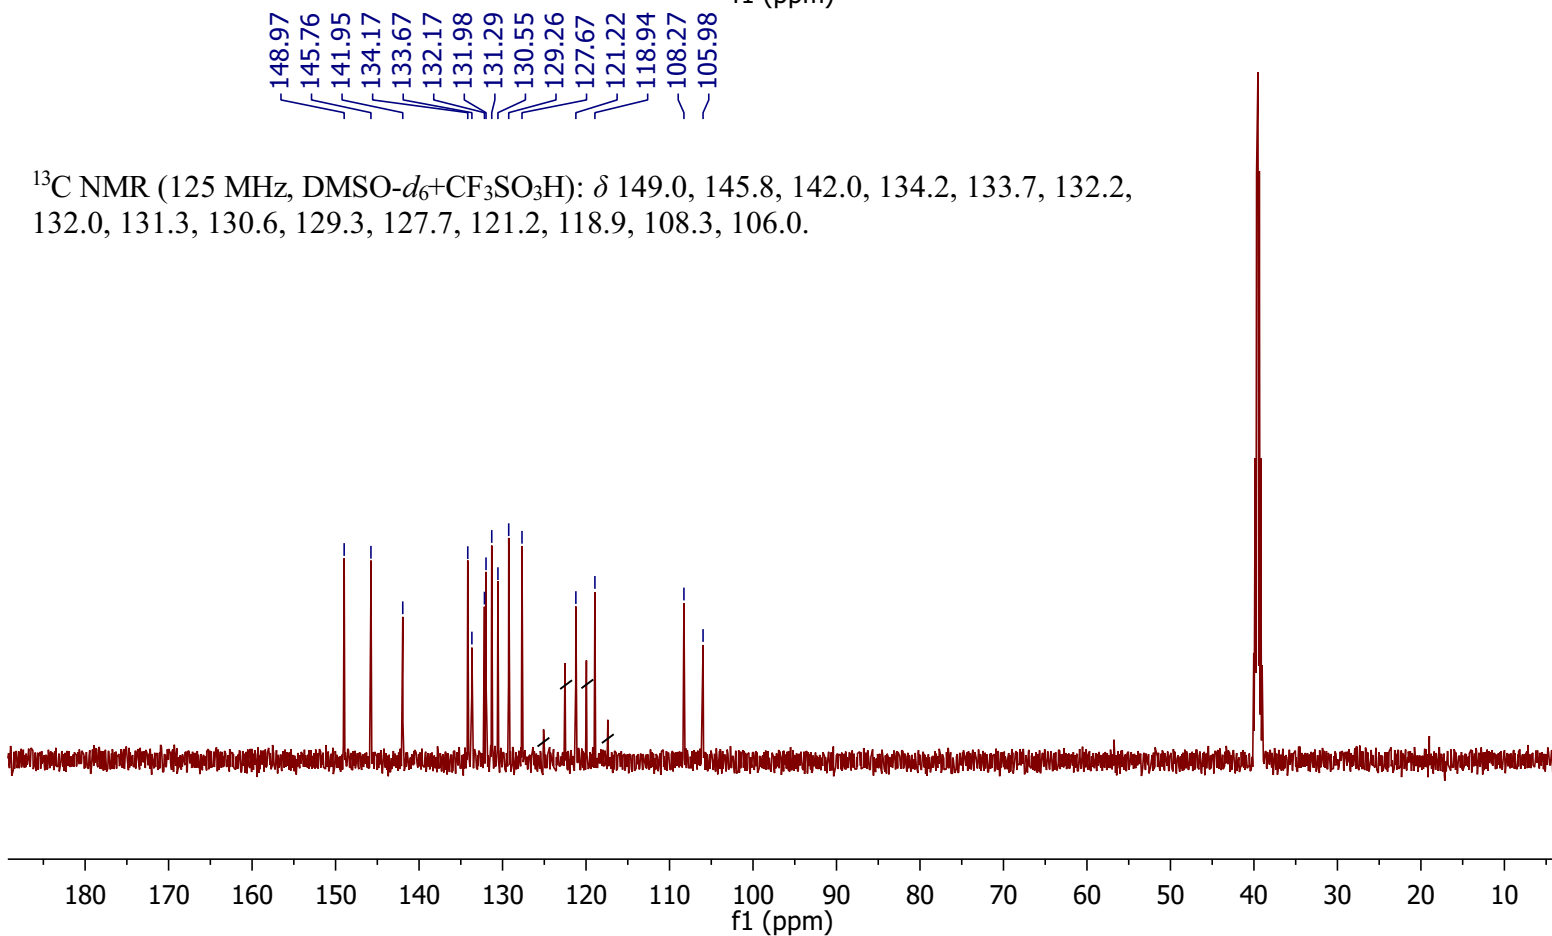

**Compound 15** 4-(4-(4-chlorophenyl)-5-(trifluoromethyl)-1H-pyrazol-3-yl)benzene-1,2,3-triol

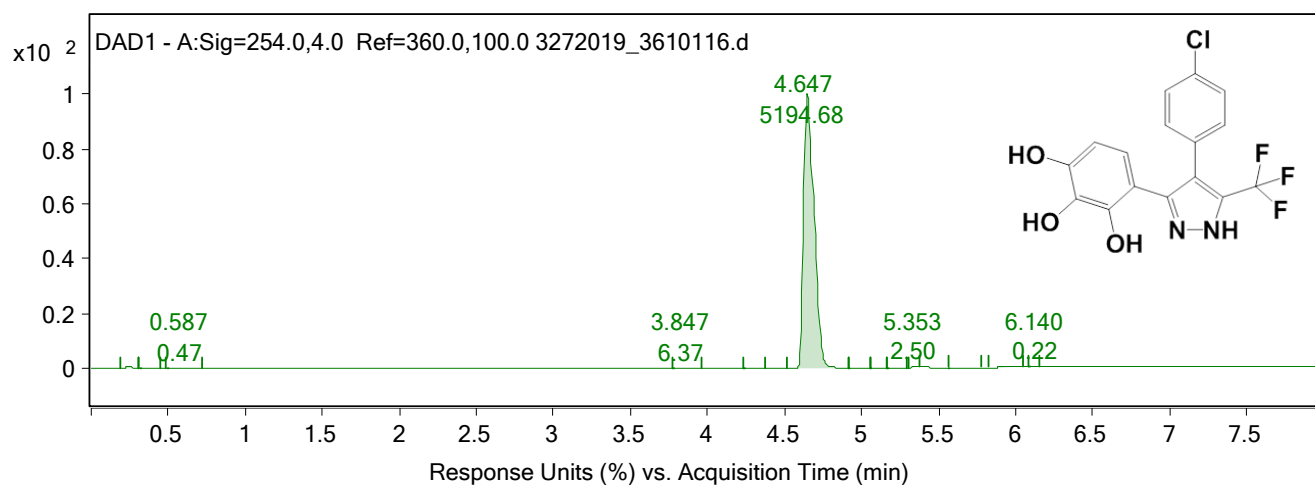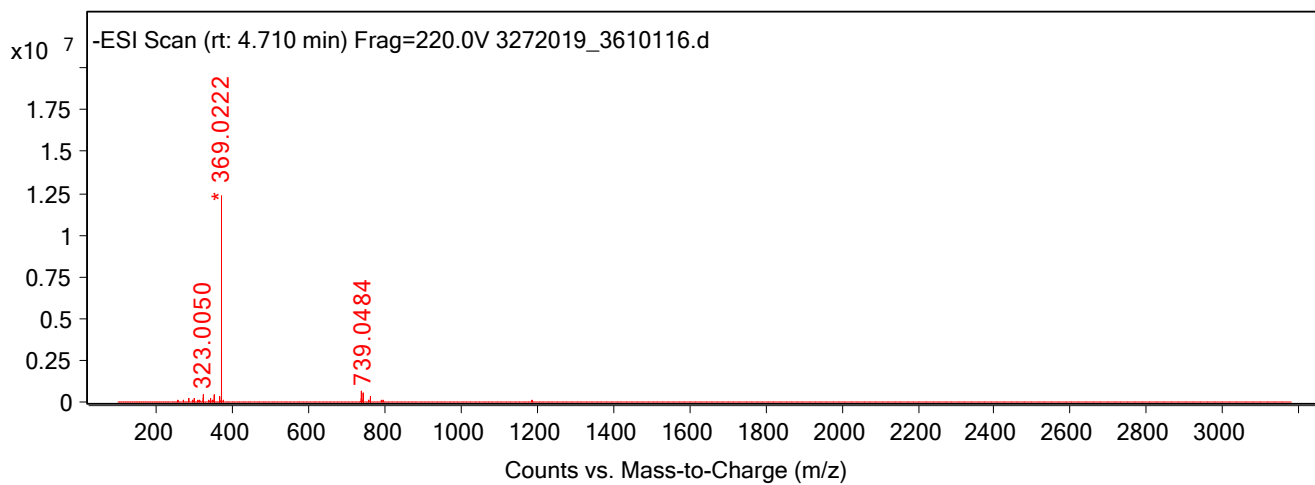

**Integration Peak List**

| Peak | Start | RT    | End   | Height  | Area    | Area % |
|------|-------|-------|-------|---------|---------|--------|
| 1    | 0.193 | 0.247 | 0.307 | 11.3    | 30.84   | 0.59   |
| 2    | 0.307 | 0.42  | 0.453 | 0.07    | 0.8     | 0.02   |
| 3    | 0.487 | 0.587 | 0.72  | 0.07    | 0.47    | 0.01   |
| 4    | 3.773 | 3.847 | 3.967 | 1.58    | 6.37    | 0.12   |
| 5    | 4.233 | 4.287 | 4.373 | 0.27    | 1.21    | 0.02   |
| 6    | 4.513 | 4.647 | 4.913 | 1115.08 | 5194.68 | 100    |
| 7    | 4.913 | 4.96  | 5.053 | 0.6     | 2.3     | 0.04   |
| 8    | 5.053 | 5.1   | 5.167 | 0.25    | 0.81    | 0.02   |
| 9    | 5.167 | 5.213 | 5.293 | 0.3     | 1.19    | 0.02   |
| 10   | 5.307 | 5.353 | 5.38  | 0.85    | 2.5     | 0.05   |
| 11   | 5.56  | 5.68  | 5.773 | 0.23    | 1.33    | 0.03   |
| 12   | 5.82  | 5.947 | 6.047 | 0.37    | 1.94    | 0.04   |
| 13   | 6.087 | 6.14  | 6.16  | 0.06    | 0.22    | 0      |

**Peak List**

| m/z      | z | Abund       |
|----------|---|-------------|
| 323.005  |   | 488529.26   |
| 351.0001 |   | 420835.94   |
| 366.9952 |   | 309645.48   |
| 369.0222 |   | 13021154.19 |
| 370.0156 |   | 7897708.54  |
| 371.0121 | 1 | 10494937.34 |
| 372.011  | 1 | 2990711.89  |
| 373.0144 | 1 | 345631.77   |
| 739.0484 | 1 | 697510.4    |
| 741.0473 | 1 | 523211.75   |

<sup>1</sup>H NMR (400 MHz, DMSO-*d*<sub>6</sub>): δ 13.59 (s, 1H), 9.43 (s, 1H), 8.70 (s, 2H), 7.37 (d, *J* = 8.2 Hz, 2H), 7.21 (d, *J* = 8.2 Hz, 2H), 6.36 – 6.26 (m, 2H).

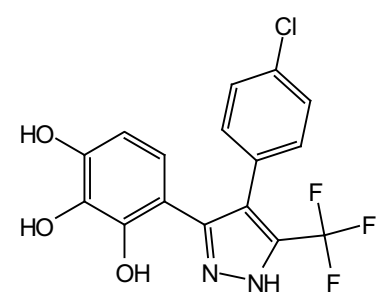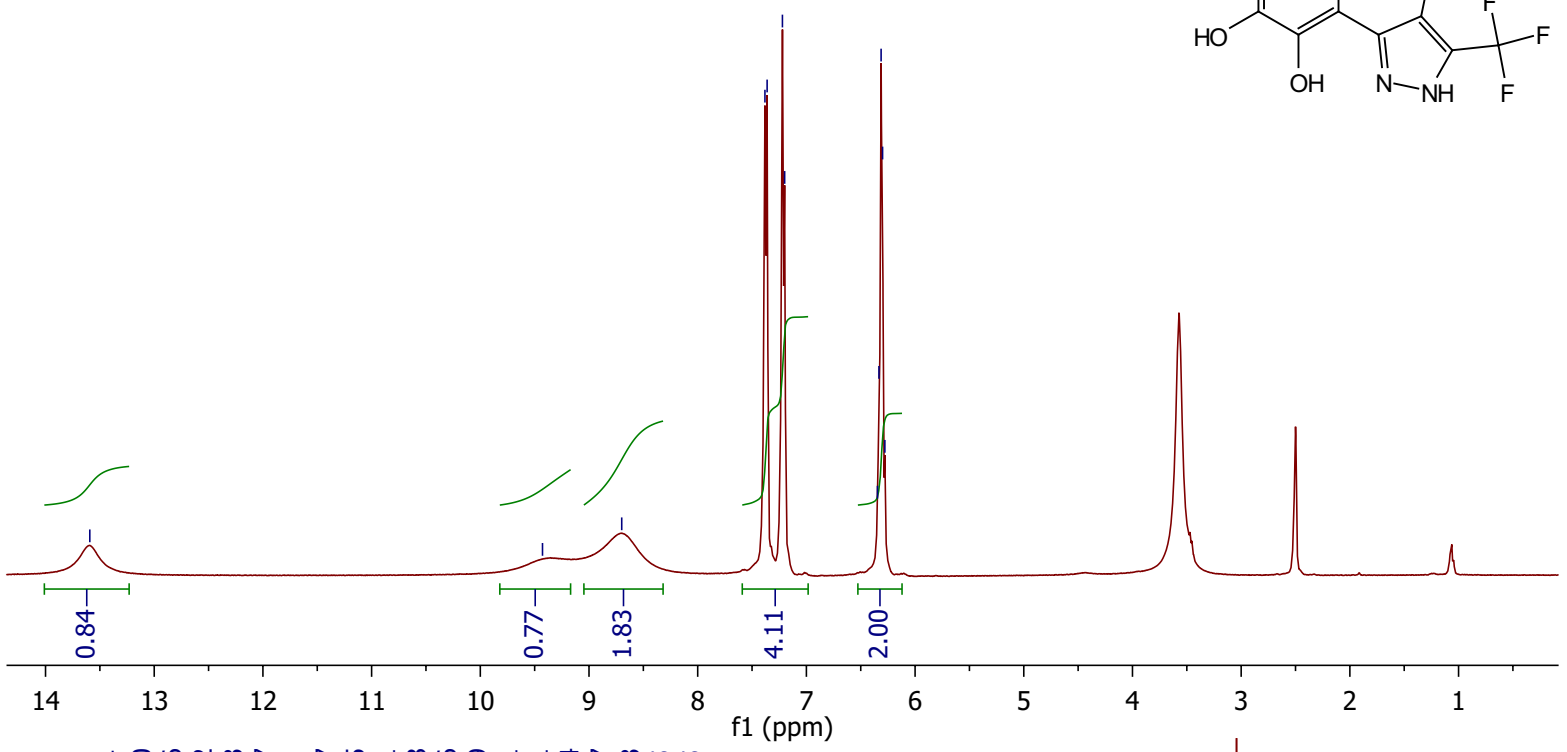

147.34  
145.40  
140.46  
138.82  
138.43  
138.07  
137.73  
133.37  
132.15  
131.51  
130.78  
128.36  
126.39  
123.71  
121.21  
121.04  
118.37  
116.93  
107.35  
107.15

<sup>13</sup>C NMR (100 MHz, DMSO-*d*<sub>6</sub>): δ 147.3, 145.4, 140.5, 138.3 (q, *J*<sub>C-F</sub> = 36.2 Hz), 133.4, 132.2, 131.5, 130.8, 128.4, 122.5 (q, *J*<sub>C-F</sub> = 251.9 Hz), 121.0, 116.9, 107.4, 107.2.

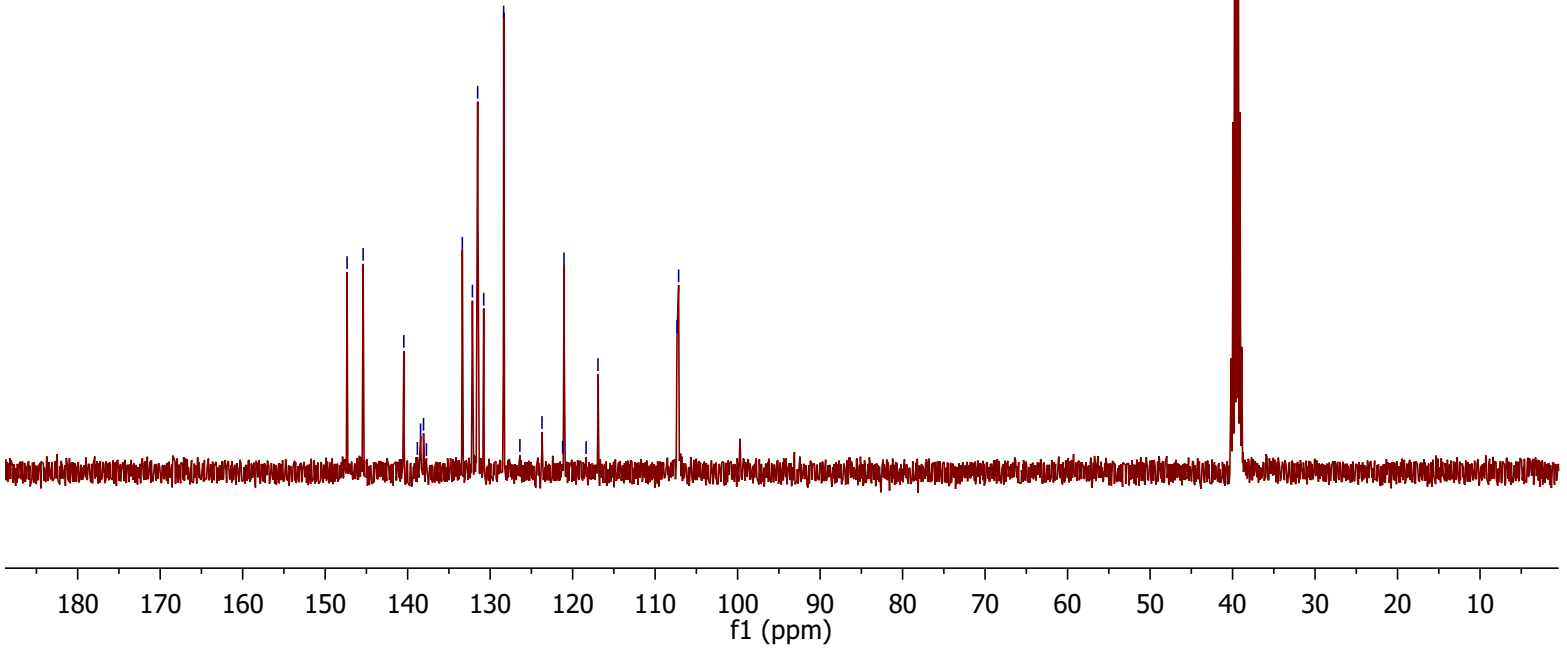

**Compound 16** 4-(4-(4-chlorophenyl)-5-(trifluoromethyl)-1H-pyrazol-3-yl)benzene-1,3-diol

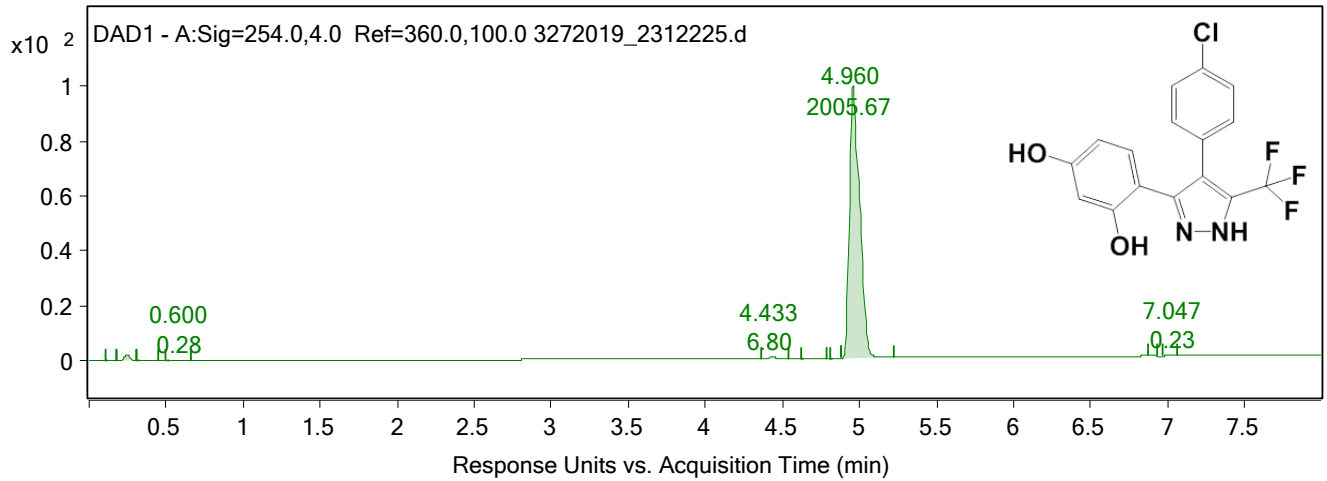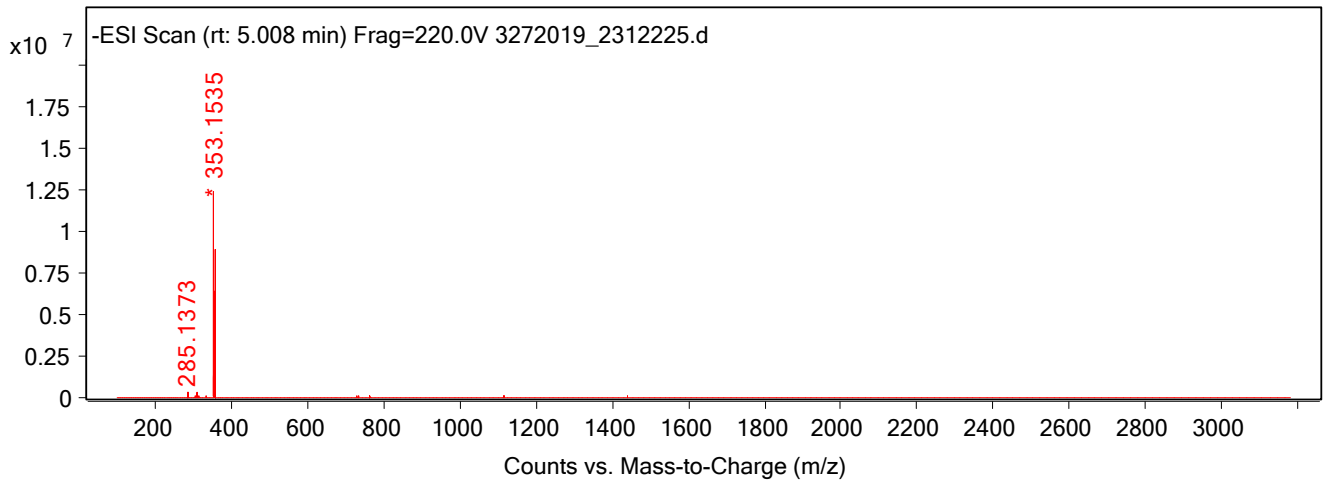

**Integration Peak List**

| Peak | Start | RT    | End   | Height | Area    | Area % |
|------|-------|-------|-------|--------|---------|--------|
| 1    | 0.107 | 0.16  | 0.18  | 0.04   | 0.14    | 0.01   |
| 2    | 0.18  | 0.247 | 0.307 | 9.74   | 26.17   | 1.3    |
| 3    | 0.307 | 0.42  | 0.453 | 0.09   | 1.07    | 0.05   |
| 4    | 0.5   | 0.6   | 0.66  | 0.04   | 0.28    | 0.01   |
| 5    | 4.367 | 4.433 | 4.54  | 1.38   | 6.8     | 0.34   |
| 6    | 4.627 | 4.68  | 4.787 | 0.22   | 0.9     | 0.04   |
| 7    | 4.813 | 4.86  | 4.88  | 0.17   | 0.47    | 0.02   |
| 8    | 4.88  | 4.96  | 5.227 | 429.67 | 2005.67 | 100    |
| 9    | 6.873 | 6.887 | 6.933 | 0.02   | 0.05    | 0      |
| 10   | 6.967 | 7.047 | 7.067 | 0.04   | 0.23    | 0.01   |

**Peak List**

| m/z      | z | Abund       |
|----------|---|-------------|
| 285.1104 |   | 327454.33   |
| 285.1373 |   | 370084.54   |
| 309.1447 |   | 176622.35   |
| 311.1269 |   | 353285.21   |
| 353.1535 |   | 12688231.04 |
| 354.1497 |   | 6437695.07  |
| 355.1461 | 1 | 8983528.61  |
| 356.1464 | 1 | 2152307.59  |
| 357.1502 | 1 | 213734.47   |

—13.56

~9.77  
~9.62

7.39  
7.37  
7.22  
7.20  
6.81  
6.79  
6.42  
6.42  
6.22  
6.21  
6.20  
6.19

$^1\text{H}$  NMR (400 MHz,  $\text{DMSO-}d_6$ ):  $\delta$  13.56 (s, 1H), 9.77 (s, 1H), 9.62 (s, 1H), 7.38 (d,  $J = 8.6$  Hz, 2H), 7.21 (d,  $J = 8.6$  Hz, 2H), 6.80 (d,  $J = 8.4$  Hz, 1H), 6.42 (d,  $J = 2.3$  Hz, 1H), 6.21 (dd,  $J = 2.3, 8.4$  Hz, 1H).

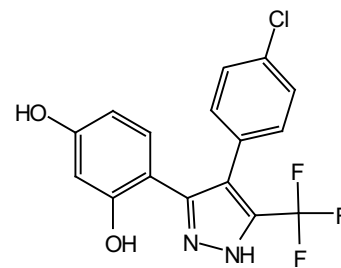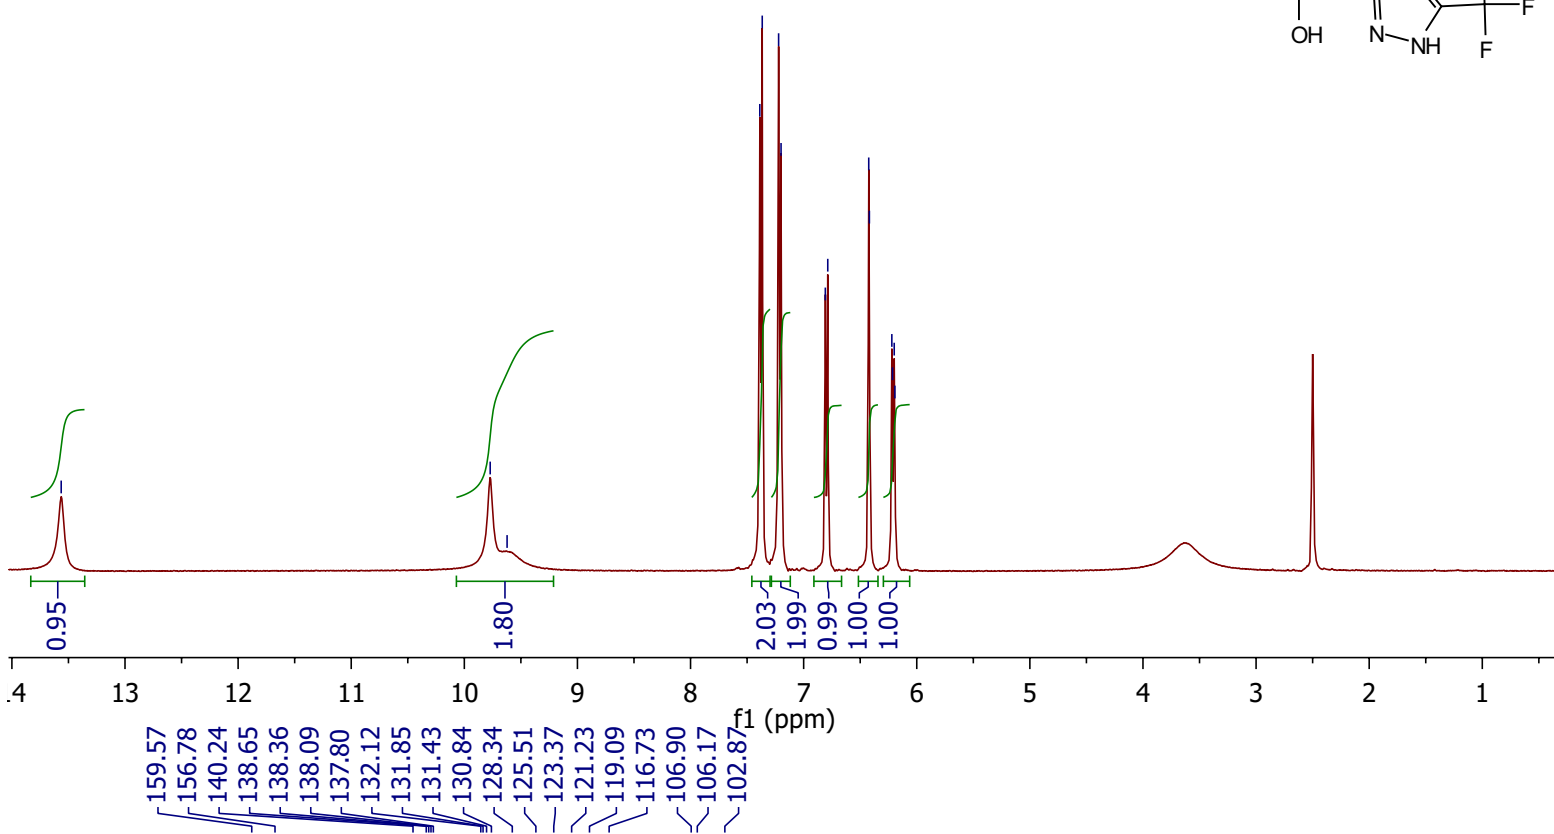

$^{13}\text{C}$  NMR (125 MHz,  $\text{DMSO-}d_6$ ):  $\delta$  159.6, 156.8, 140.2, 138.2 (q,  $J_{\text{C-F}} = 34.3$  Hz), 132.1, 131.9, 131.4, 130.8, 128.3, 122.3 (q,  $J_{\text{C-F}} = 269.1$  Hz), 116.7, 106.9, 106.2, 102.9.

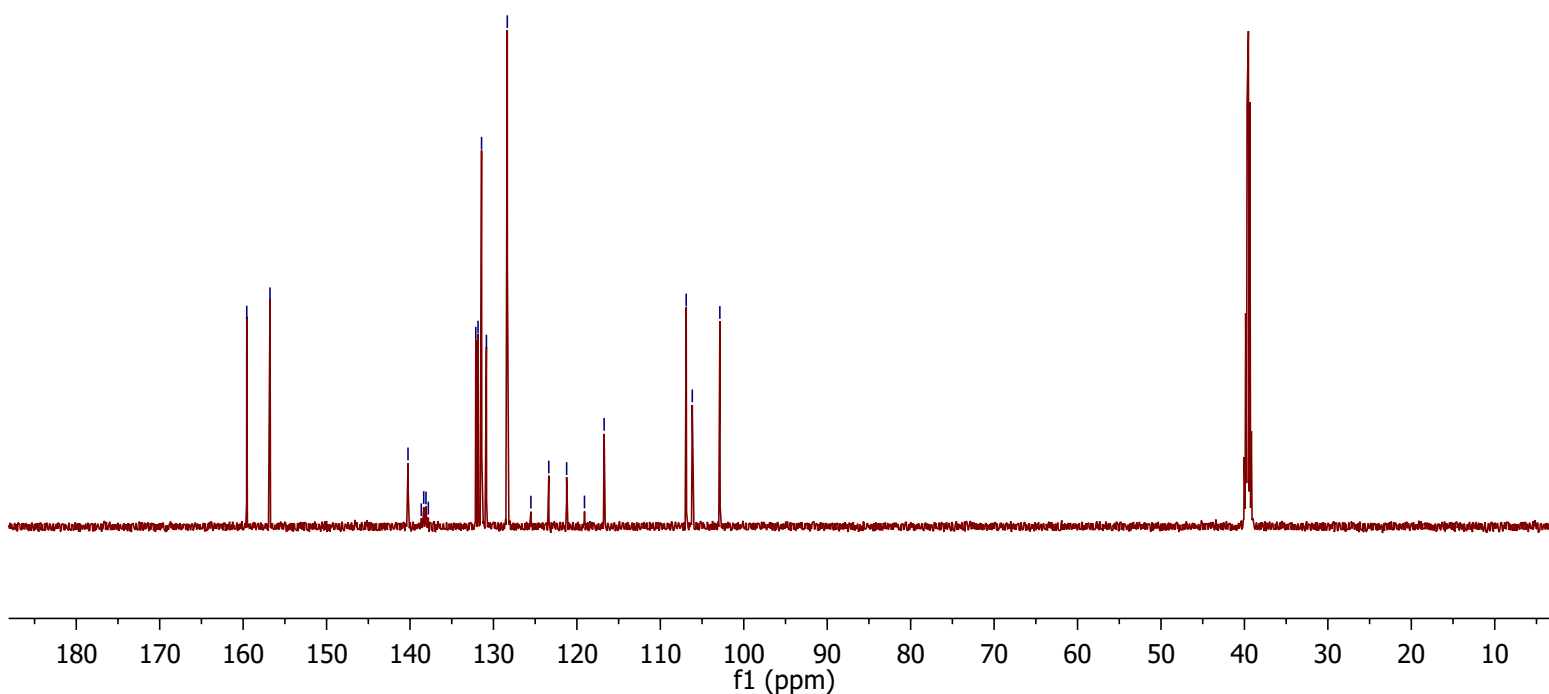

**Compound 17** 4-(4-(3,4-dichlorophenyl)-5-(trifluoromethyl)-1H-pyrazol-3-yl)benzene-1,2,3-triol

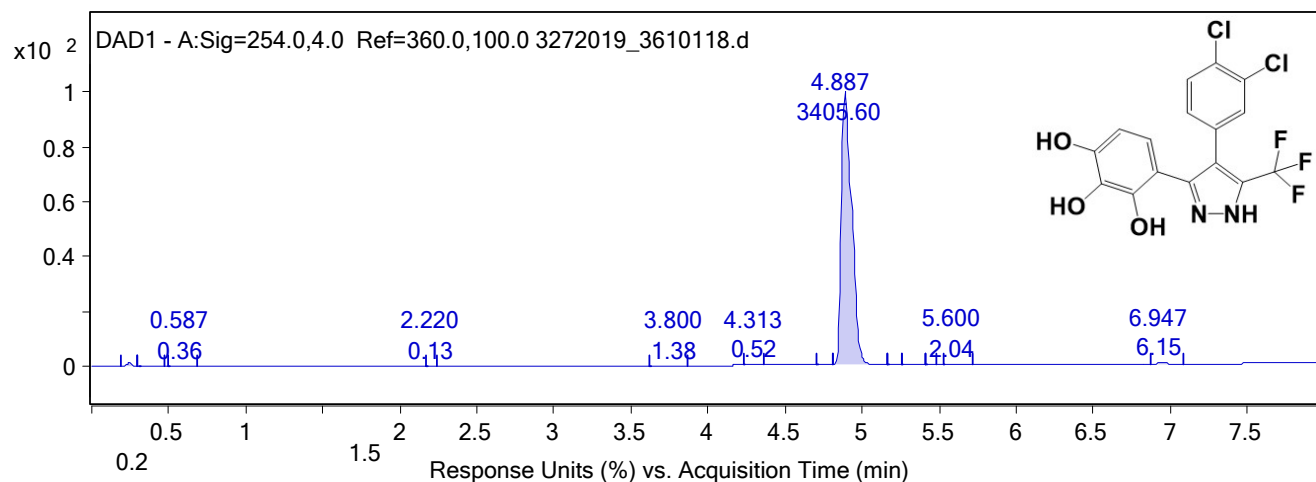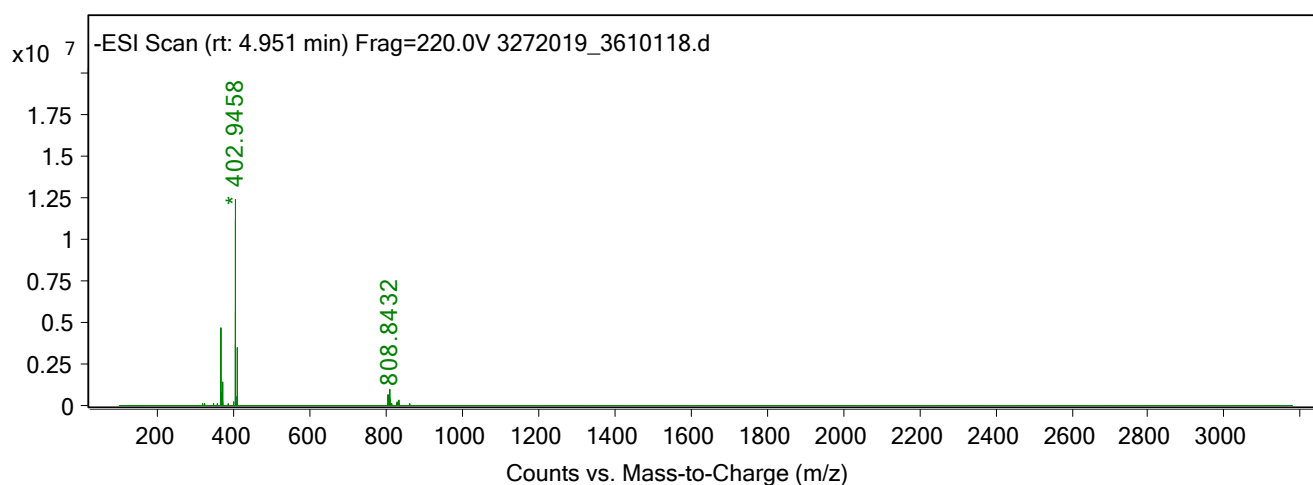

**Integration Peak List**

| Peak | Start | RT    | End   | Height | Area   | Area % |
|------|-------|-------|-------|--------|--------|--------|
| 1    | 0.187 | 0.24  | 0.3   | 9.15   | 24.59  | 0.72   |
| 2    | 0.3   | 0.413 | 0.473 | 0.14   | 1.45   | 0.04   |
| 3    | 0.493 | 0.587 | 0.687 | 0.06   | 0.36   | 0.01   |
| 4    | 2.167 | 2.22  | 2.24  | 0.03   | 0.13   | 0      |
| 5    | 3.62  | 3.8   | 3.867 | 0.14   | 1.38   | 0.04   |
| 6    | 4.227 | 4.313 | 4.36  | 0.09   | 0.52   | 0.02   |
| 7    | 4.707 | 4.753 | 4.813 | 0.57   | 1.67   | 0.05   |
| 8    | 4.813 | 4.887 | 5.16  | 726.45 | 3405.6 | 100    |
| 9    | 5.167 | 5.213 | 5.253 | 0.17   | 0.47   | 0.01   |
| 10   | 5.253 | 5.313 | 5.407 | 0.1    | 0.37   | 0.01   |
| 11   | 5.413 | 5.46  | 5.487 | 0.07   | 0.19   | 0.01   |
| 12   | 5.527 | 5.6   | 5.72  | 0.36   | 2.04   | 0.06   |
| 13   | 6.873 | 6.947 | 7.08  | 1.26   | 6.15   | 0.18   |

**Peak List**

| m/z      | z | Abund       |
|----------|---|-------------|
| 366.9693 | 1 | 4752759.75  |
| 367.9719 | 1 | 823723.02   |
| 368.966  | 1 | 1503513.23  |
| 402.9458 | 1 | 12738211.75 |
| 403.9422 | 1 | 5774486.97  |
| 404.9402 | 1 | 11269582.34 |
| 405.9384 | 1 | 3741349.04  |
| 406.9329 | 1 | 3503906.36  |
| 806.846  | 1 | 669865.41   |
| 808.8432 | 1 | 935041      |

—13.68

—9.48

8.75

8.75

8.57

7.57

7.55

7.39

7.38

7.16

7.16

7.14

7.14

6.38

6.36

6.33

6.31

$^1\text{H}$  NMR (400 MHz, DMSO- $d_6$ ):  $\delta$  13.68 (s, 1H), 9.48 (s, 1H), 8.86 – 8.66 (m, 1H), 8.57 (s, 1H), 7.56 (d,  $J = 8.3$  Hz, 1H), 7.39 (d,  $J = 2.0$  Hz, 1H), 7.15 (dd,  $J = 2.0, 8.3$  Hz, 1H), 6.37 (d,  $J = 8.4$  Hz, 1H), 6.32 (d,  $J = 8.4$  Hz, 1H).

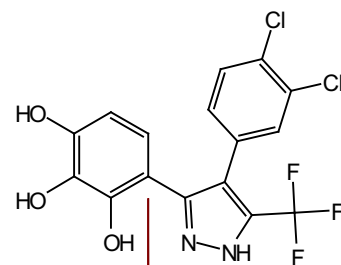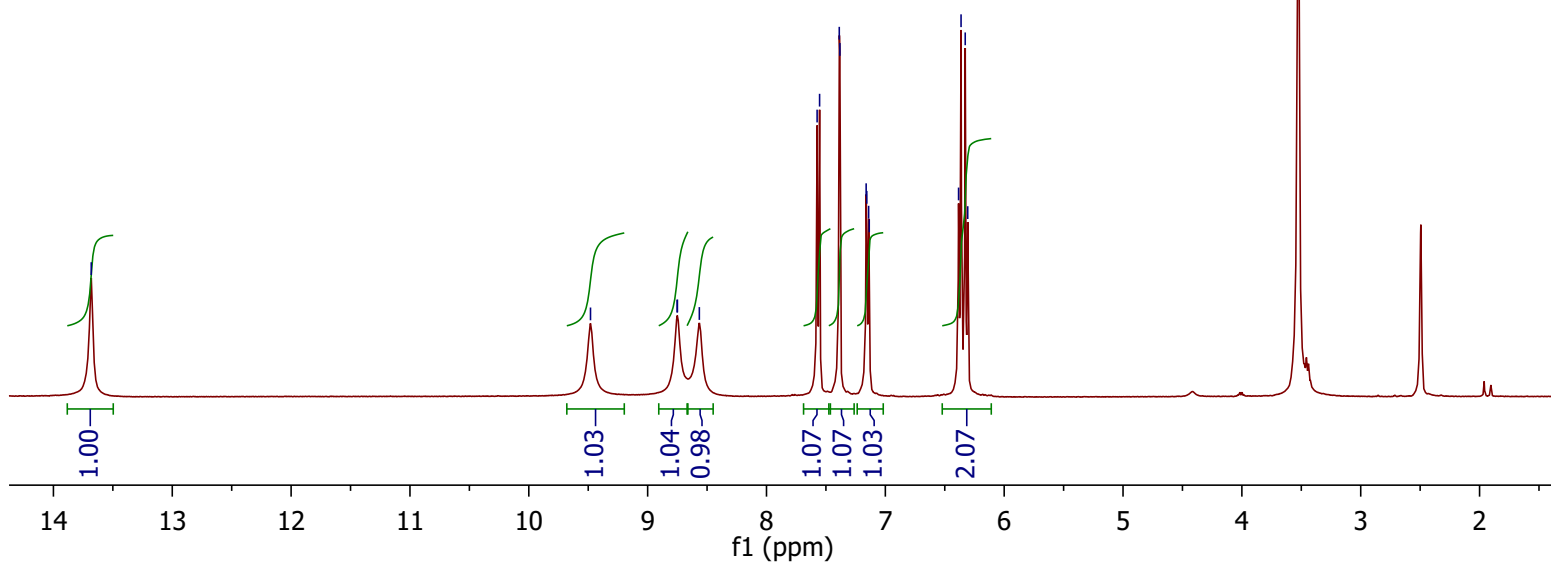

147.49  
145.27  
140.80  
138.71  
138.36  
138.01  
137.67  
133.42  
132.71  
131.23  
130.88  
130.49  
130.12  
129.96  
126.23  
123.55  
120.97  
120.88  
118.20  
115.71  
107.25  
106.99

$^{13}\text{C}$  NMR (100 MHz, DMSO- $d_6$ ):  $\delta$  147.5, 145.3, 140.8, 138.2 (q,  $J_{C-F} = 35.1$  Hz), 133.4, 132.7, 131.2, 130.9, 130.5, 130.1, 130.0, 122.2 (q,  $J_{C-F} = 269.2$  Hz), 121.0, 115.7, 107.3, 107.0.

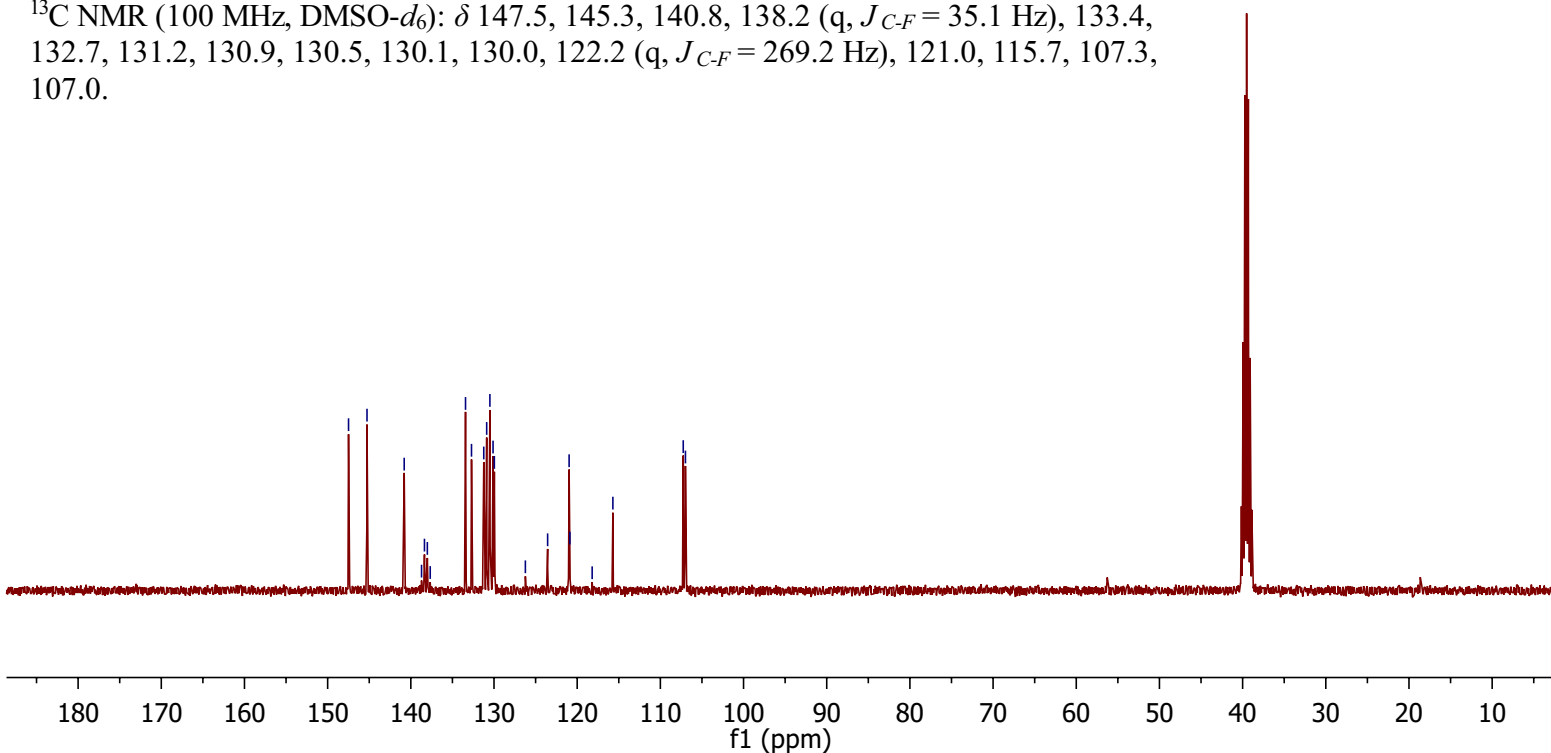



**Compound 18** 4-(4-(4-fluorophenyl)-5-methyl-1H-pyrazol-3-yl)benzene-1,2,3-triol

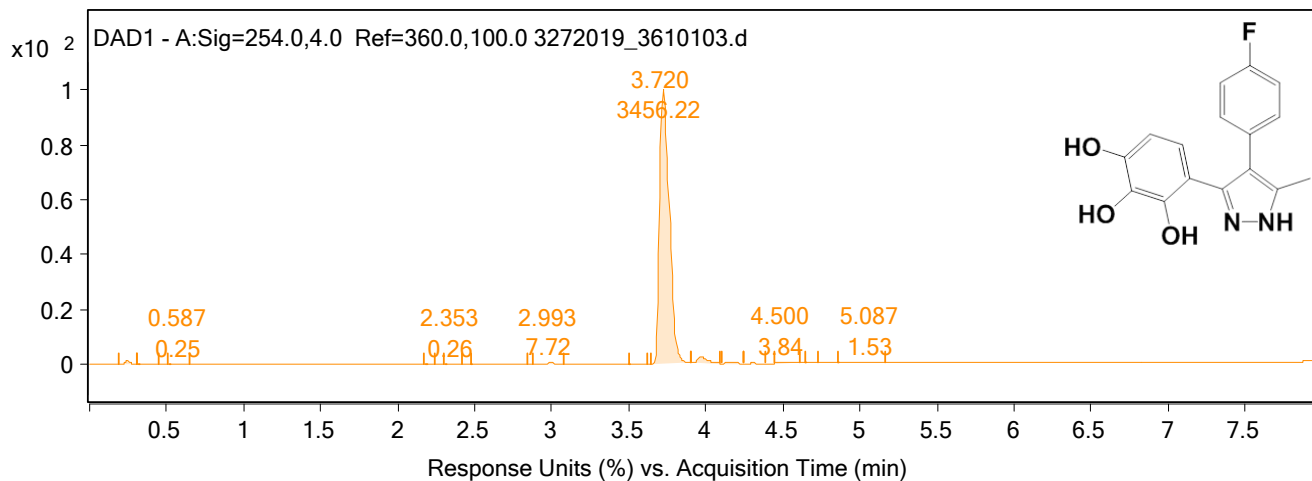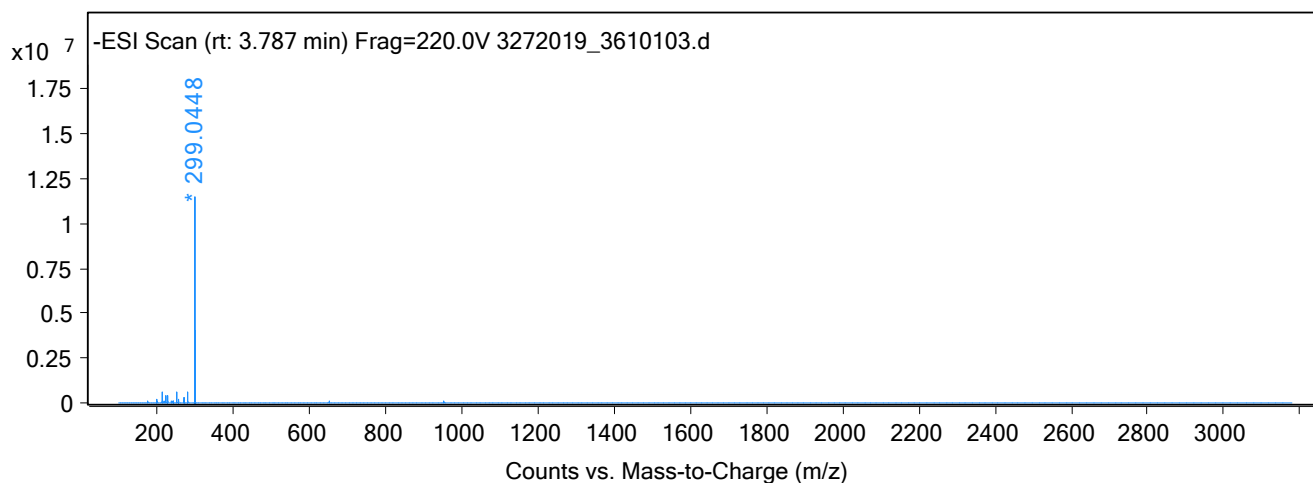

**Integration Peak List**

| Peak | Start | RT    | End   | Height | Area    | Area % |
|------|-------|-------|-------|--------|---------|--------|
| 1    | 0.193 | 0.247 | 0.307 | 9.97   | 26.66   | 0.77   |
| 2    | 0.307 | 0.413 | 0.453 | 0.1    | 1.02    | 0.03   |
| 3    | 0.507 | 0.587 | 0.647 | 0.05   | 0.25    | 0.01   |
| 4    | 2.173 | 2.227 | 2.24  | 0.03   | 0.14    | 0      |
| 5    | 2.3   | 2.353 | 2.413 | 0.07   | 0.26    | 0.01   |
| 6    | 2.473 | 2.787 | 2.84  | 0.16   | 1.1     | 0.03   |
| 7    | 2.873 | 2.993 | 3.073 | 2.19   | 7.72    | 0.22   |
| 8    | 3.5   | 3.56  | 3.62  | 0.32   | 1.37    | 0.04   |
| 9    | 3.64  | 3.72  | 3.9   | 793.61 | 3456.22 | 100    |
| 10   | 3.9   | 3.973 | 4.093 | 16.84  | 71.42   | 2.07   |
| 11   | 4.107 | 4.153 | 4.247 | 0.47   | 1.87    | 0.05   |
| 12   | 4.247 | 4.3   | 4.38  | 0.08   | 0.36    | 0.01   |
| 13   | 4.44  | 4.5   | 4.607 | 0.87   | 3.84    | 0.11   |
| 14   | 4.64  | 4.7   | 4.727 | 0.13   | 0.57    | 0.02   |
| 15   | 4.853 | 5.087 | 5.167 | 0.15   | 1.53    | 0.04   |

**Peak List**

| m/z      | z | Abund       |
|----------|---|-------------|
| 215.0747 |   | 608449.92   |
| 225.057  |   | 458540.64   |
| 227.0724 |   | 375293.79   |
| 253.0454 |   | 618141.45   |
| 255.0608 |   | 258330.33   |
| 271.0511 |   | 280983.23   |
| 281.0341 | 1 | 639626.81   |
| 299.0448 | 1 | 11641235.74 |
| 300.0436 | 1 | 4150325.16  |
| 301.0464 | 1 | 432038.13   |

7.24  
7.22  
7.22  
7.20  
7.15  
7.13  
7.11  
6.36  
6.33  
6.29  
6.27

$^1\text{H NMR}$  (400 MHz,  $\text{DMSO-}d_6 + \text{CF}_3\text{SO}_3\text{H}$ ):  $\delta$  7.22 (dd,  $J = 5.4, 8.5$  Hz, 2H), 7.13 (t,  $J = 8.7$  Hz, 2H), 6.35 (d,  $J = 8.5$  Hz, 1H), 6.28 (d,  $J = 8.5$  Hz, 1H), 2.31 (s, 3H).

— 2.31

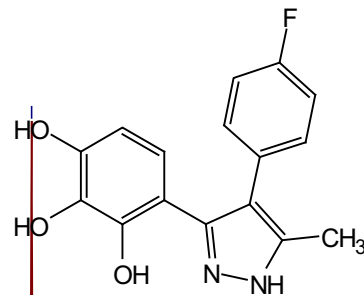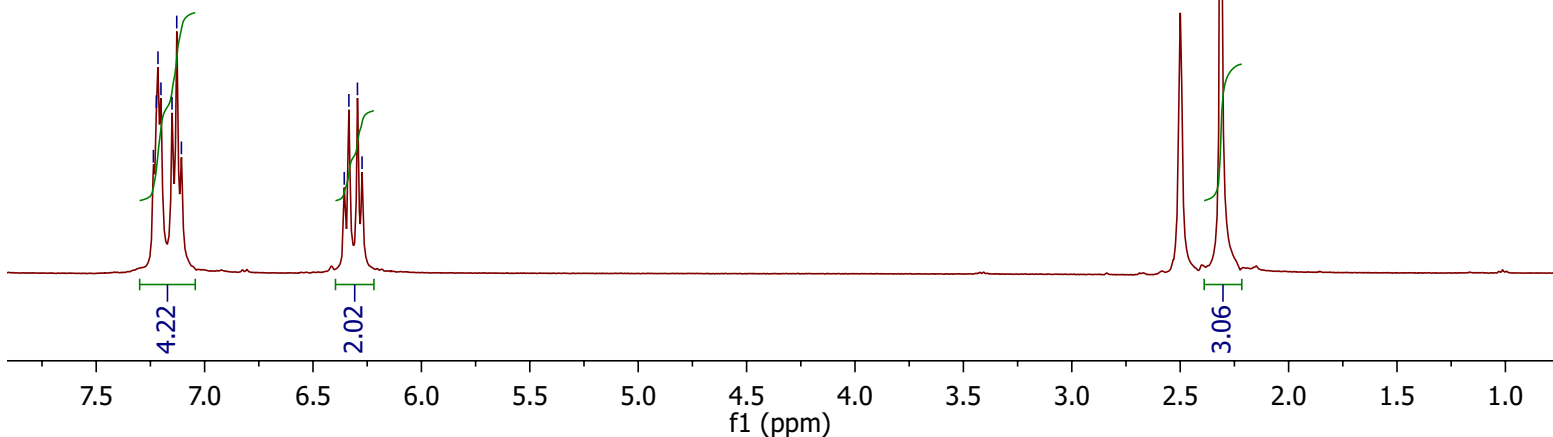

163.26  
160.82  
148.59  
145.72  
142.73  
142.31  
133.73  
131.86  
131.78  
126.88  
126.85  
121.14  
118.74  
116.12  
115.90  
107.77  
105.56

$^{13}\text{C NMR}$  (100 MHz,  $\text{DMSO-}d_6 + \text{CF}_3\text{SO}_3\text{H}$ ):  $\delta$  162.0 (d,  $J_{\text{C-F}} = 245.1$  Hz), 148.6, 145.7, 142.7, 142.3, 133.7, 131.8 (d,  $J_{\text{C-F}} = 8.3$  Hz), 126.9 (d,  $J_{\text{C-F}} = 3.2$  Hz), 121.1, 118.7, 116.0 (d,  $J_{\text{C-F}} = 21.5$  Hz), 107.8, 105.6, 10.4.

— 10.36

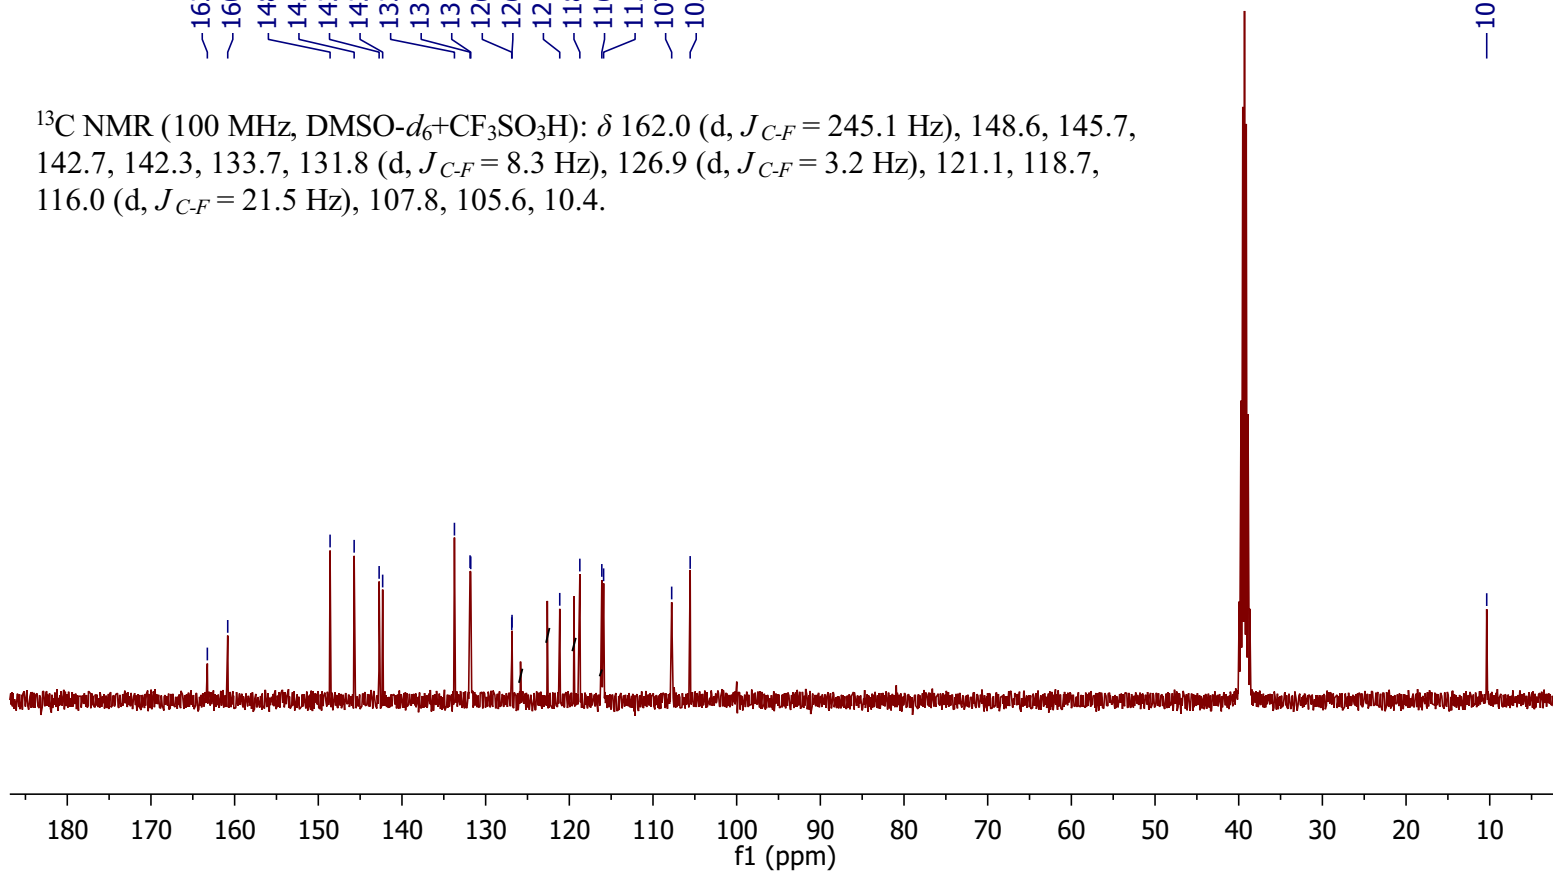

**Compound 19** 4-(4-(4-fluorophenyl)-5-(trifluoromethyl)-1H-pyrazol-3-yl)benzene-1,2,3-triol

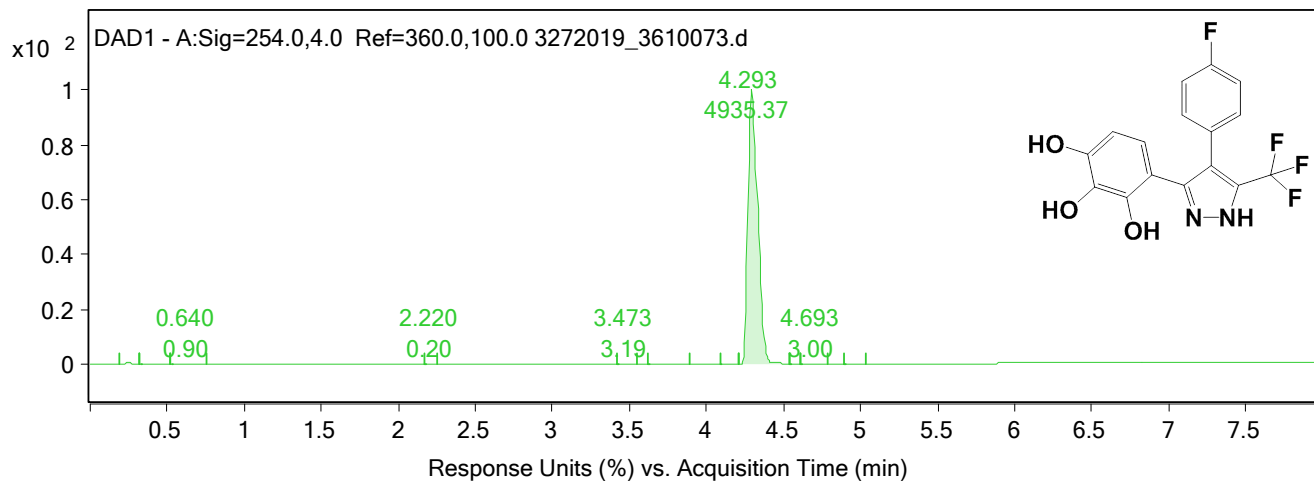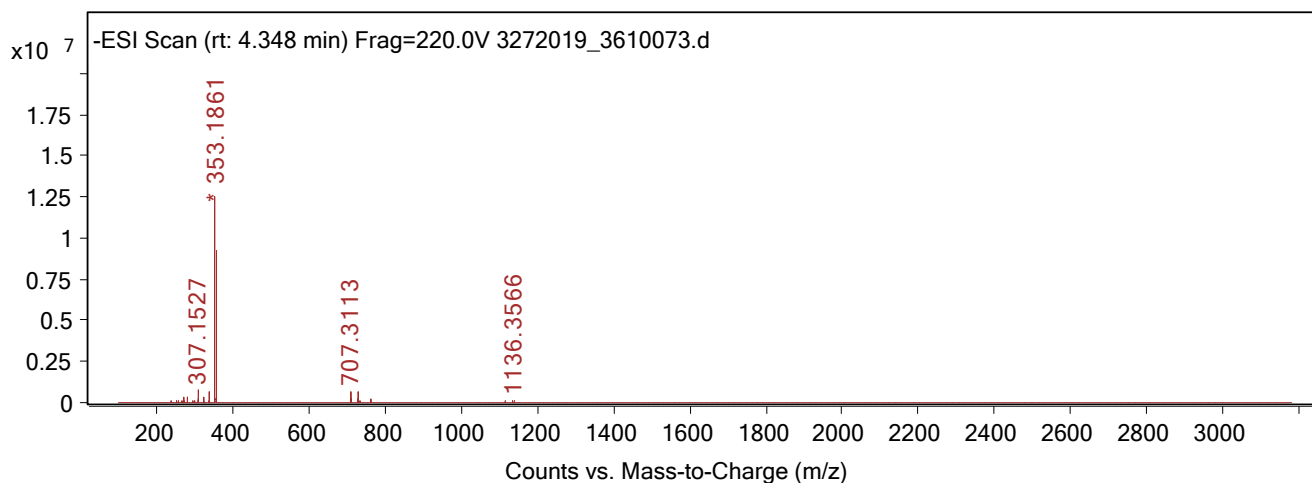

**Integration Peak List**

| Peak | Start | RT    | End   | Height  | Area    | Area % |
|------|-------|-------|-------|---------|---------|--------|
| 1    | 0.193 | 0.247 | 0.313 | 9.09    | 25.86   | 0.52   |
| 2    | 0.32  | 0.433 | 0.513 | 0.13    | 0.9     | 0.02   |
| 3    | 0.52  | 0.64  | 0.753 | 0.12    | 0.9     | 0.02   |
| 4    | 2.167 | 2.22  | 2.247 | 0.06    | 0.2     | 0      |
| 5    | 3.42  | 3.473 | 3.553 | 0.9     | 3.19    | 0.06   |
| 6    | 3.62  | 3.84  | 3.887 | 0.07    | 0.72    | 0.01   |
| 7    | 4.087 | 4.147 | 4.213 | 0.36    | 1.52    | 0.03   |
| 8    | 4.213 | 4.293 | 4.54  | 1102.25 | 4935.37 | 100    |
| 9    | 4.54  | 4.58  | 4.613 | 0.22    | 0.51    | 0.01   |
| 10   | 4.613 | 4.693 | 4.787 | 0.61    | 3       | 0.06   |
| 11   | 4.893 | 4.953 | 5.04  | 0.37    | 1.59    | 0.03   |

**Peak List**

| m/z      | z | Abund       |
|----------|---|-------------|
| 269.1644 |   | 351354.43   |
| 281.1675 |   | 370840.32   |
| 307.1527 |   | 827917.75   |
| 325.1679 |   | 402255      |
| 335.1545 | 1 | 718899.9    |
| 353.1861 |   | 13100601.37 |
| 354.176  | 1 | 9218924.82  |
| 355.1759 | 1 | 1561479.22  |
| 707.3113 | 1 | 723030.18   |
| 729.298  | 1 | 693025.55   |

—13.53

8.75  
7.26  
7.25  
7.24  
7.23  
7.16  
7.13  
7.11  
6.34  
6.32  
6.30  
6.28

$^1\text{H}$  NMR (400 MHz,  $\text{DMSO-}d_6$ ):  $\delta$  13.53 (s, 1H), 8.75 (s, 3H), 7.24 (dd,  $J = 5.4, 8.7$  Hz, 2H), 7.13 (t,  $J = 8.7$  Hz, 2H), 6.33 (d,  $J = 8.5$  Hz, 1H), 6.29 (d,  $J = 8.5$  Hz, 1H).

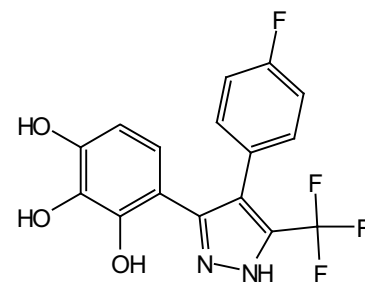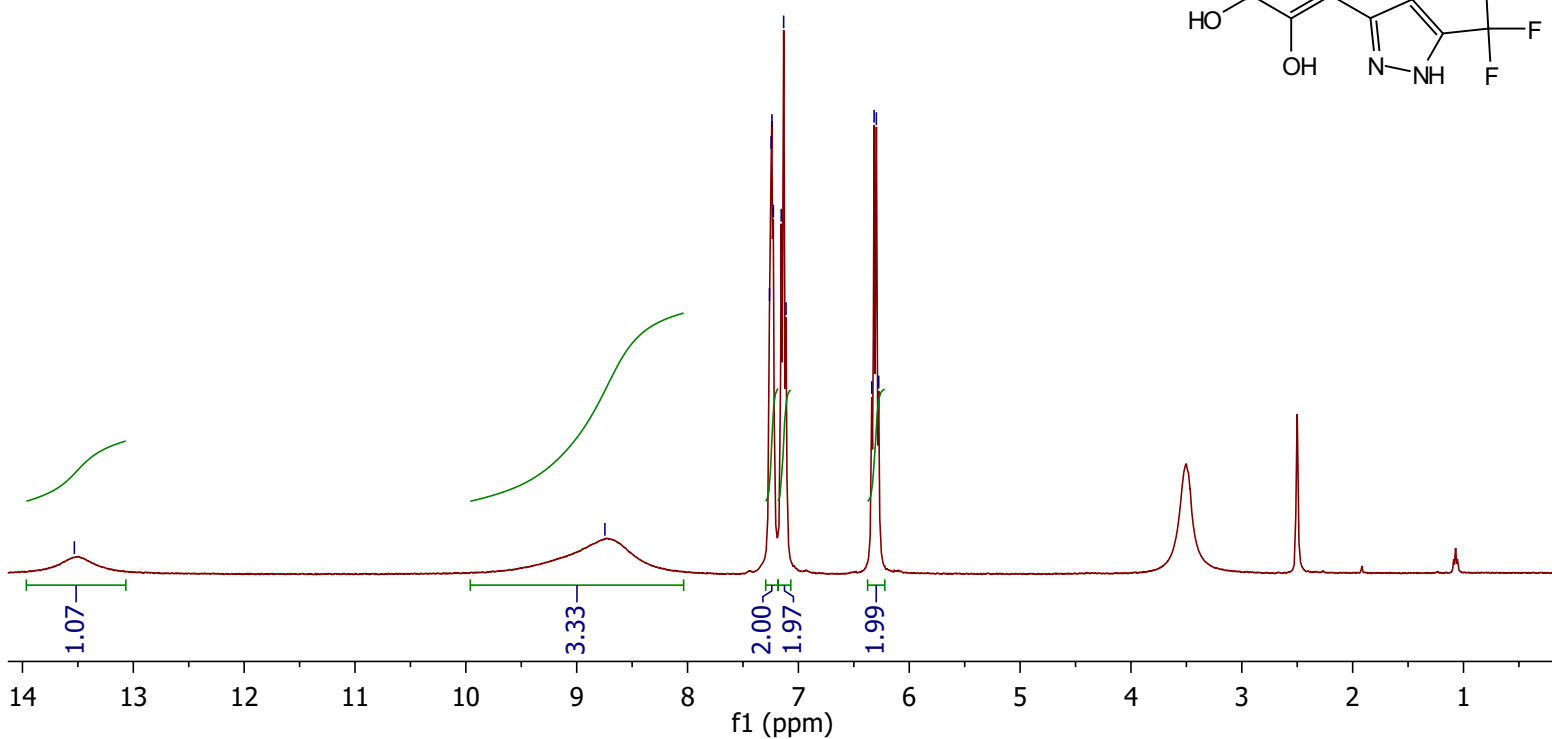

162.80  
160.38  
147.29  
145.47  
140.38  
138.87  
138.53  
138.18  
137.84  
133.37  
131.84  
131.75  
128.17  
128.14  
126.46  
123.78  
121.09  
121.08  
118.44  
117.18  
115.30  
115.09  
107.49  
107.12

$^{13}\text{C}$  NMR (100 MHz,  $\text{DMSO-}d_6$ ):  $\delta$  161.6 (d,  $J_{\text{C-F}} = 243.9$  Hz), 147.3, 145.5, 140.4, 138.4 (q,  $J_{\text{C-F}} = 34.6$  Hz), 133.4, 131.8 (d,  $J_{\text{C-F}} = 8.3$  Hz), 128.2 (d,  $J_{\text{C-F}} = 3.3$  Hz), 122.4 (q,  $J_{\text{C-F}} = 271.4$  Hz), 121.1, 117.2, 115.2 (d,  $J_{\text{C-F}} = 21.4$  Hz), 107.5, 107.1.

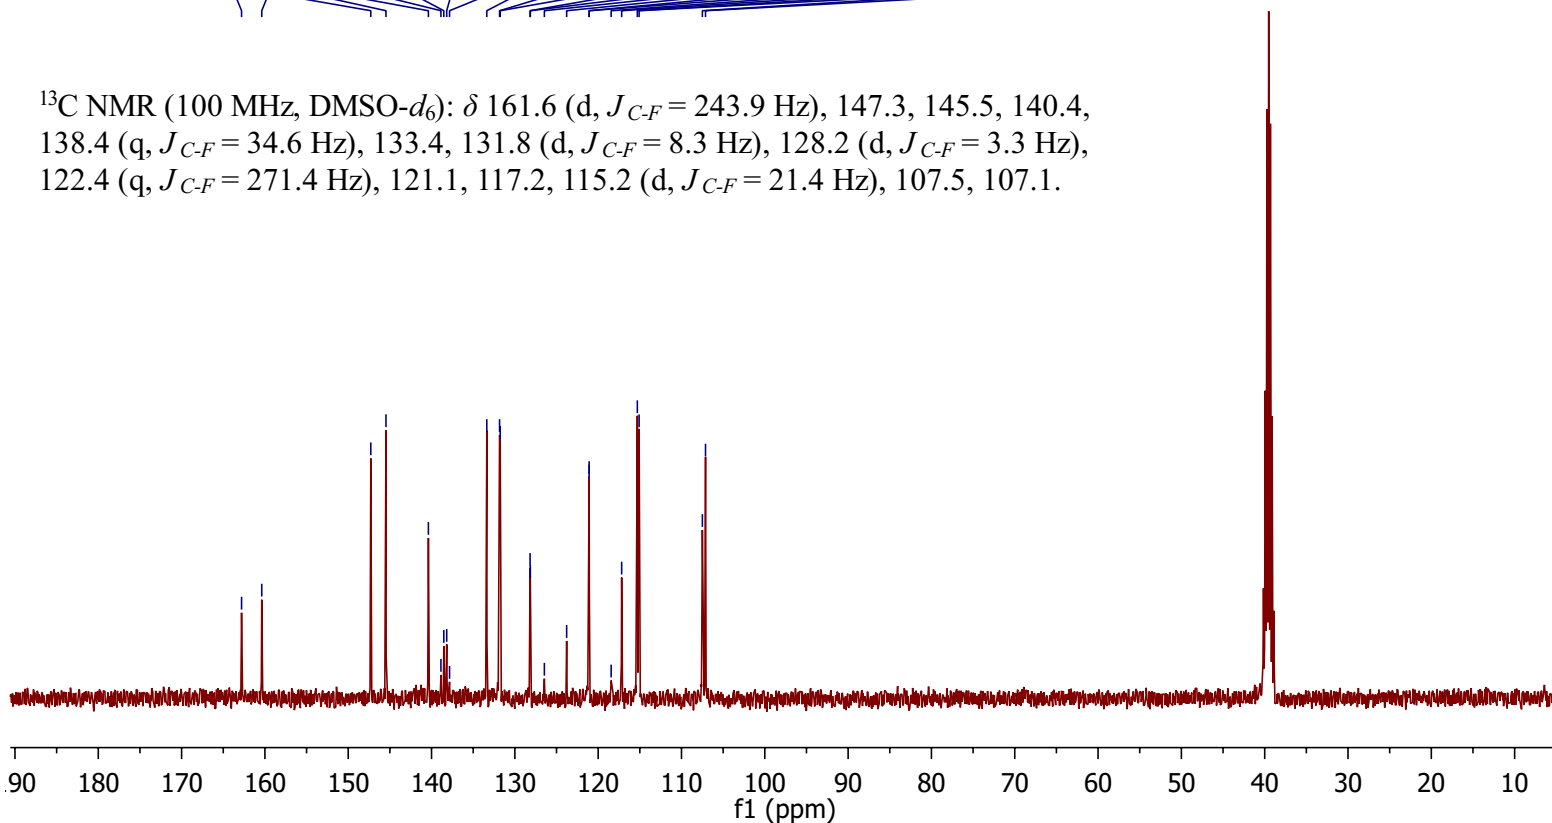

**Compound 20** 4-(4-phenyl-1H-pyrazol-3-yl)benzene-1,2,3-triol

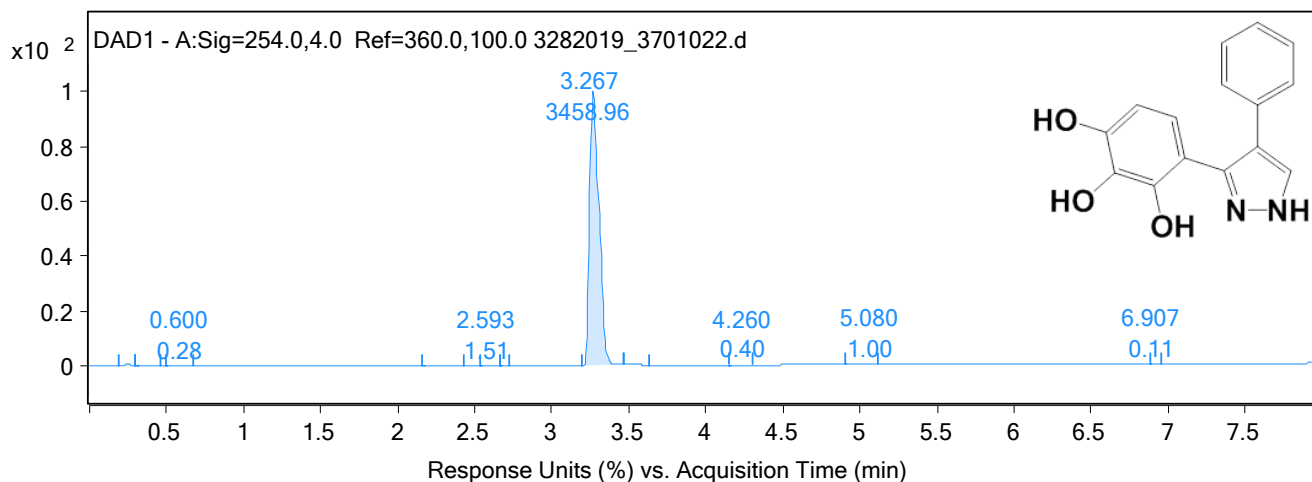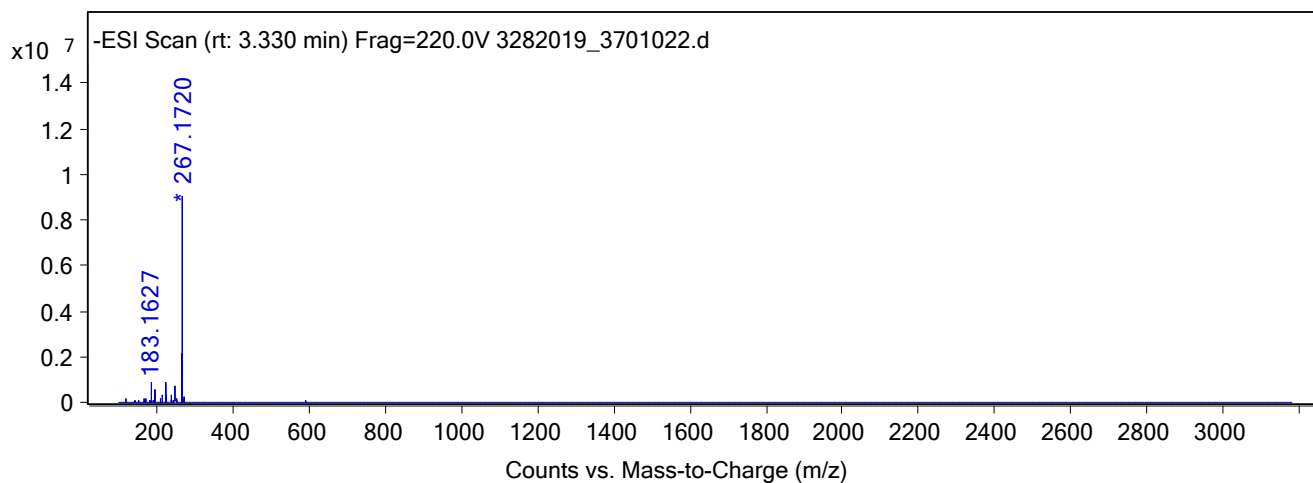

**Integration Peak List**

| Peak | Start | RT    | End   | Height | Area    | Area % |
|------|-------|-------|-------|--------|---------|--------|
| 1    | 0.193 | 0.247 | 0.293 | 6.36   | 16.48   | 0.48   |
| 2    | 0.3   | 0.427 | 0.46  | 0.11   | 1.68    | 0.05   |
| 3    | 0.493 | 0.6   | 0.667 | 0.04   | 0.28    | 0.01   |
| 4    | 2.16  | 2.347 | 2.433 | 0.3    | 1.41    | 0.04   |
| 5    | 2.533 | 2.593 | 2.66  | 0.42   | 1.51    | 0.04   |
| 6    | 2.667 | 2.72  | 2.727 | 0.02   | 0.13    | 0      |
| 7    | 3.2   | 3.267 | 3.467 | 819.26 | 3458.96 | 100    |
| 8    | 3.467 | 3.513 | 3.627 | 1.49   | 6.56    | 0.19   |
| 9    | 4.153 | 4.26  | 4.3   | 0.09   | 0.4     | 0.01   |
| 10   | 4.9   | 5.08  | 5.12  | 0.08   | 1       | 0.03   |
| 11   | 6.88  | 6.907 | 6.953 | 0.05   | 0.11    | 0      |

**Peak List**

| m/z      | z | Abund      |
|----------|---|------------|
| 183.1627 | 1 | 918818.04  |
| 193.15   | 1 | 595205.58  |
| 195.1661 |   | 500054.65  |
| 211.1622 |   | 291454.42  |
| 221.1519 | 1 | 905673.78  |
| 223.1687 |   | 296932.56  |
| 239.1666 |   | 320068.5   |
| 249.1541 | 1 | 749532.53  |
| 267.172  | 1 | 9068664.97 |
| 268.1729 | 1 | 2153016.24 |

8.60  
7.33  
7.31  
7.29  
7.27  
7.26  
7.24  
7.22  
7.20  
6.50  
6.48  
6.40  
6.38

$^1\text{H}$  NMR (400 MHz,  $\text{DMSO-}d_6+\text{CF}_3\text{SO}_3\text{H}$ ):  $\delta$  8.60 (s, 1H), 7.41 – 7.12 (m, 5H), 6.49 (d,  $J = 8.4$  Hz, 1H), 6.39 (d,  $J = 8.4$  Hz, 1H).

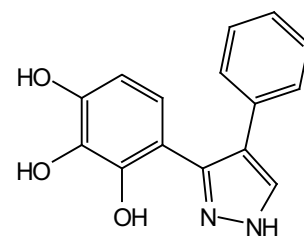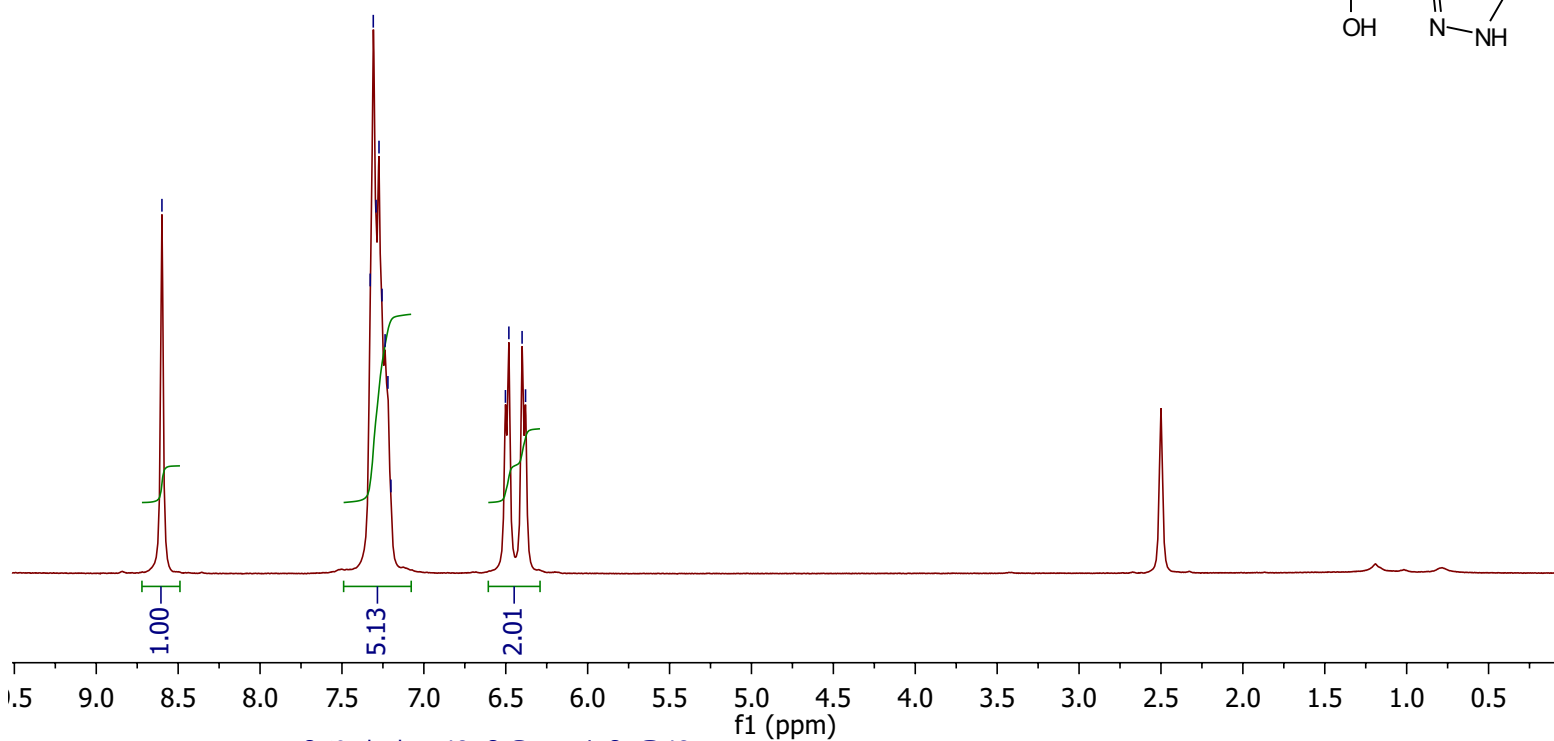

148.86  
145.93  
141.64  
134.04  
133.01  
130.85  
129.26  
128.19  
127.83  
121.52  
121.36  
108.10  
106.05

$^{13}\text{C}$  NMR (100 MHz,  $\text{DMSO-}d_6+\text{CF}_3\text{SO}_3\text{H}$ ):  $\delta$  148.9, 145.9, 141.6, 134.0, 133.0, 130.8, 129.3, 128.2, 127.8, 121.5, 121.4, 108.1, 106.1.

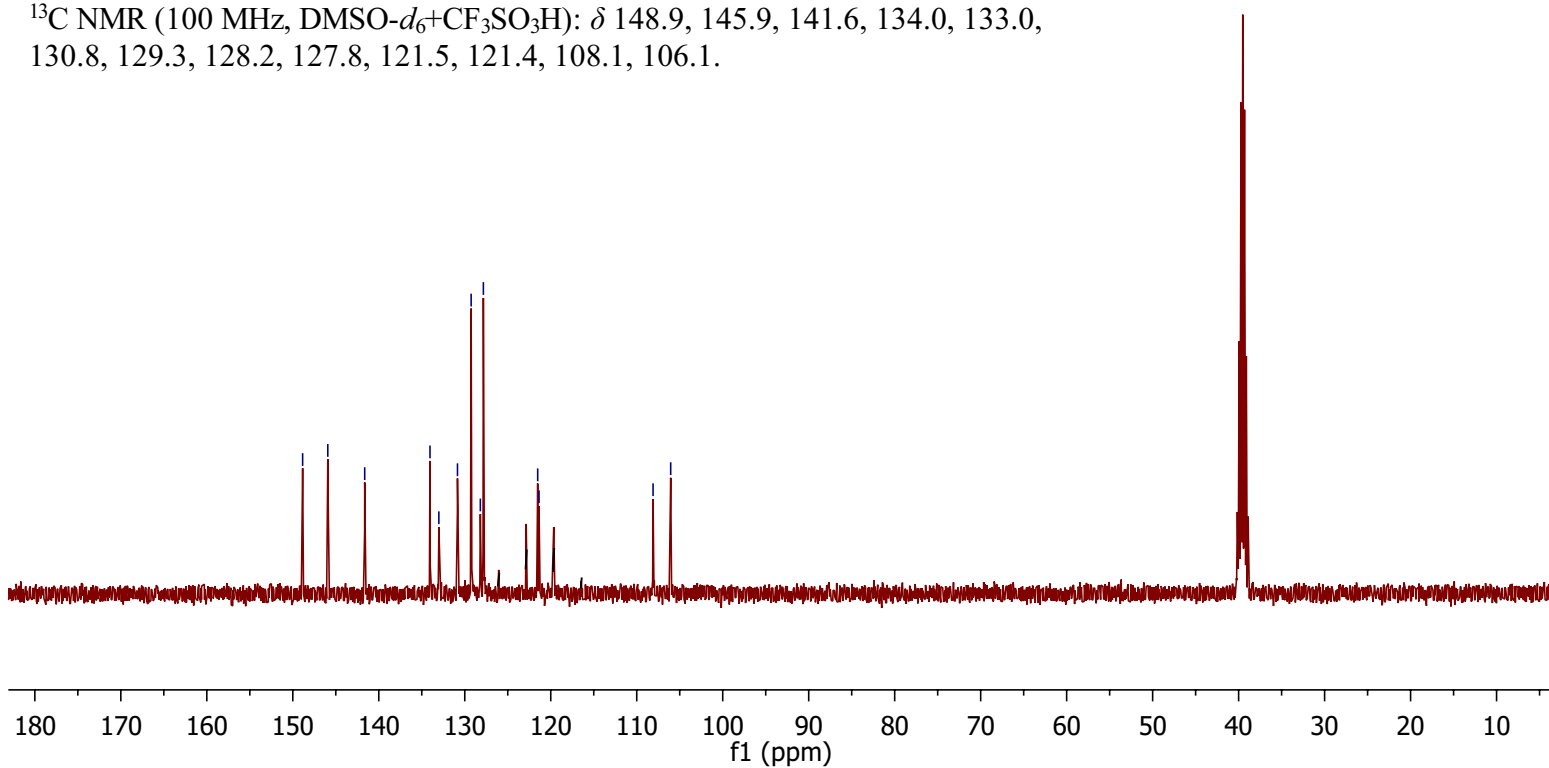

**Compound 21** 4-(4-phenyl-5-(trifluoromethyl)-1H-pyrazol-3-yl)benzene-1,2,3-triol

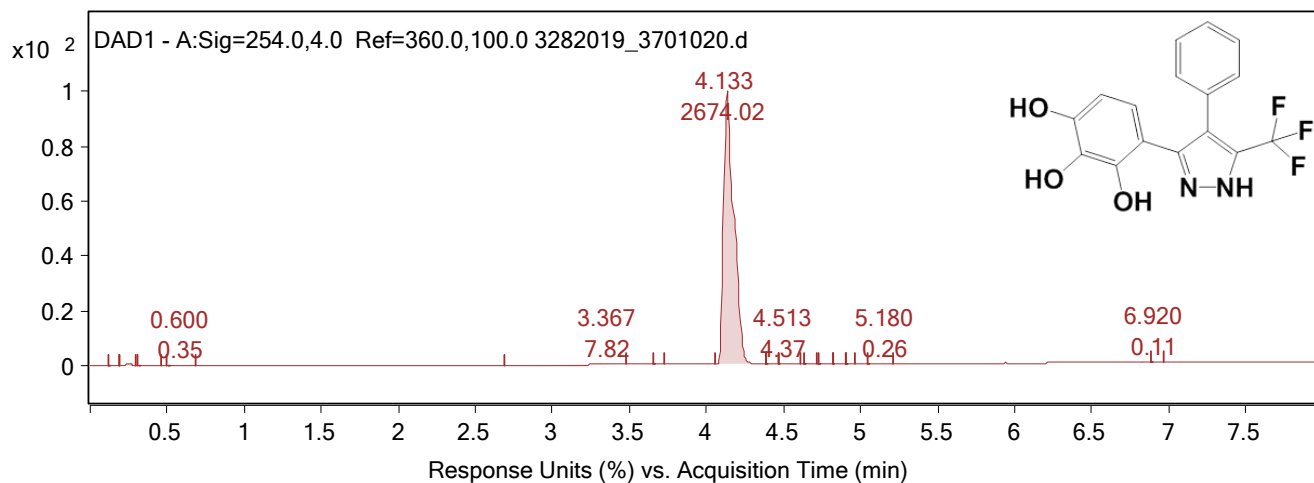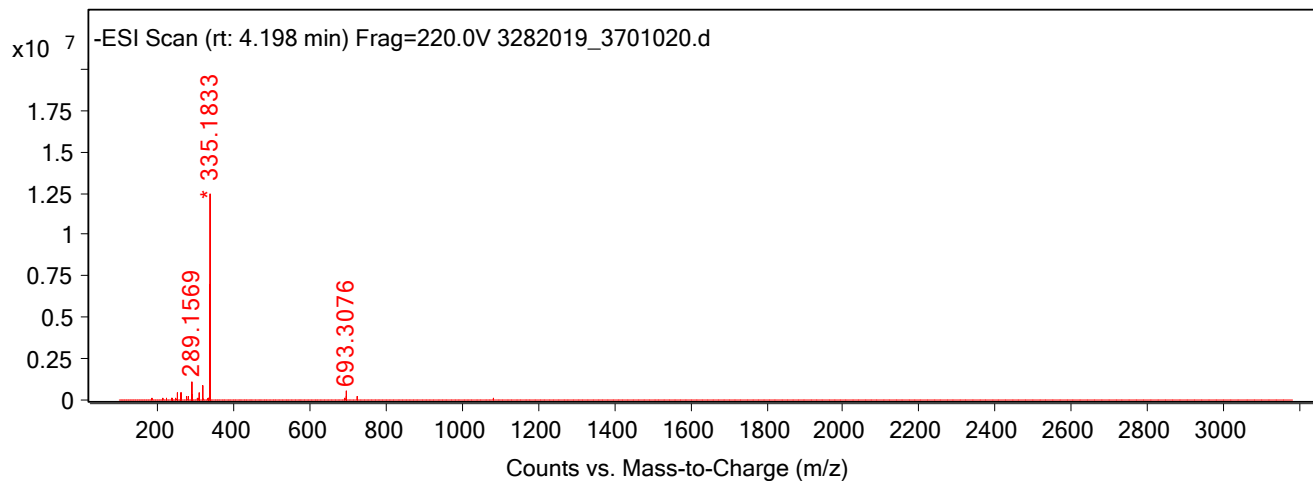

**Integration Peak List**

| Peak | Start | RT    | End   | Height | Area    | Area % |
|------|-------|-------|-------|--------|---------|--------|
| 1    | 0.12  | 0.18  | 0.193 | 0.03   | 0.19    | 0.01   |
| 2    | 0.193 | 0.253 | 0.3   | 6.18   | 16.21   | 0.61   |
| 3    | 0.307 | 0.427 | 0.46  | 0.11   | 1.56    | 0.06   |
| 4    | 0.5   | 0.6   | 0.687 | 0.05   | 0.35    | 0.01   |
| 5    | 2.687 | 3.367 | 3.473 | 1.04   | 7.82    | 0.29   |
| 6    | 3.653 | 3.7   | 3.727 | 0.06   | 0.27    | 0.01   |
| 7    | 4.053 | 4.133 | 4.38  | 572.55 | 2674.02 | 100    |
| 8    | 4.387 | 4.433 | 4.467 | 0.64   | 1.67    | 0.06   |
| 9    | 4.467 | 4.513 | 4.607 | 1.19   | 4.37    | 0.16   |
| 10   | 4.633 | 4.687 | 4.72  | 0.2    | 0.64    | 0.02   |
| 11   | 4.727 | 4.767 | 4.82  | 0.23   | 0.65    | 0.02   |
| 12   | 4.82  | 4.867 | 4.907 | 0.37   | 0.94    | 0.04   |
| 13   | 4.907 | 4.92  | 4.96  | 0.06   | 0.09    | 0      |
| 14   | 5.047 | 5.18  | 5.207 | 0.02   | 0.26    | 0.01   |
| 15   | 6.887 | 6.92  | 6.967 | 0.05   | 0.11    | 0      |

**Peak List**

| m/z      | z | Abund       |
|----------|---|-------------|
| 251.1685 |   | 482799.42   |
| 261.1553 |   | 456203.83   |
| 263.1713 |   | 453563.34   |
| 289.1569 | 1 | 1127442.04  |
| 307.1719 |   | 455484.48   |
| 317.1586 | 1 | 925159.97   |
| 335.1833 |   | 12852305.54 |
| 336.1786 | 1 | 7176820.88  |
| 337.18   | 1 | 885880.22   |
| 693.3076 | 1 | 537053.86   |

—13.50

9.39  
8.72  
8.52  
7.32  
7.30  
7.28  
7.26  
7.25  
7.21  
7.19  
6.29  
6.26  
6.24

$^1\text{H}$  NMR (400 MHz,  $\text{DMSO}-d_6$ ):  $\delta$  13.50 (s, 1H), 9.39 (s, 1H), 8.72 (s, 1H), 8.52 (s, 1H), 7.37 – 7.15 (m, 5H), 6.28 (d,  $J = 9.4$  Hz, 1H), 6.24 (d,  $J = 9.4$  Hz, 1H).

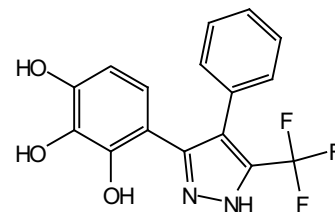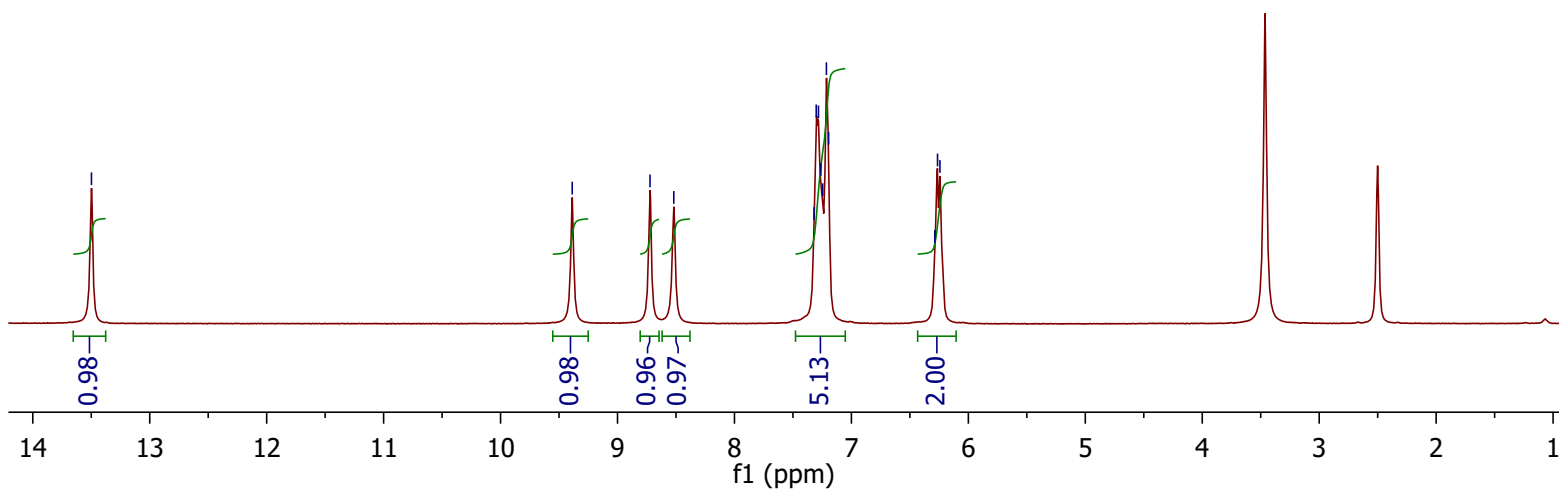

147.08  
145.42  
140.07  
138.30  
137.96  
133.18  
131.68  
129.74  
128.14  
127.12  
126.41  
123.73  
121.01  
118.38  
118.06  
107.53  
106.87

$^{13}\text{C}$  NMR (100 MHz,  $\text{DMSO}-d_6$ )  $\delta$  147.1, 145.4, 140.1, 138.1 (q,  $J_{\text{C-F}} = 34.6$  Hz), 133.2, 131.7, 129.7, 128.1, 127.1, 122.40 (q,  $J_{\text{C-F}} = 269.2$  Hz), 121.0, 118.1, 107.51, 106.9.

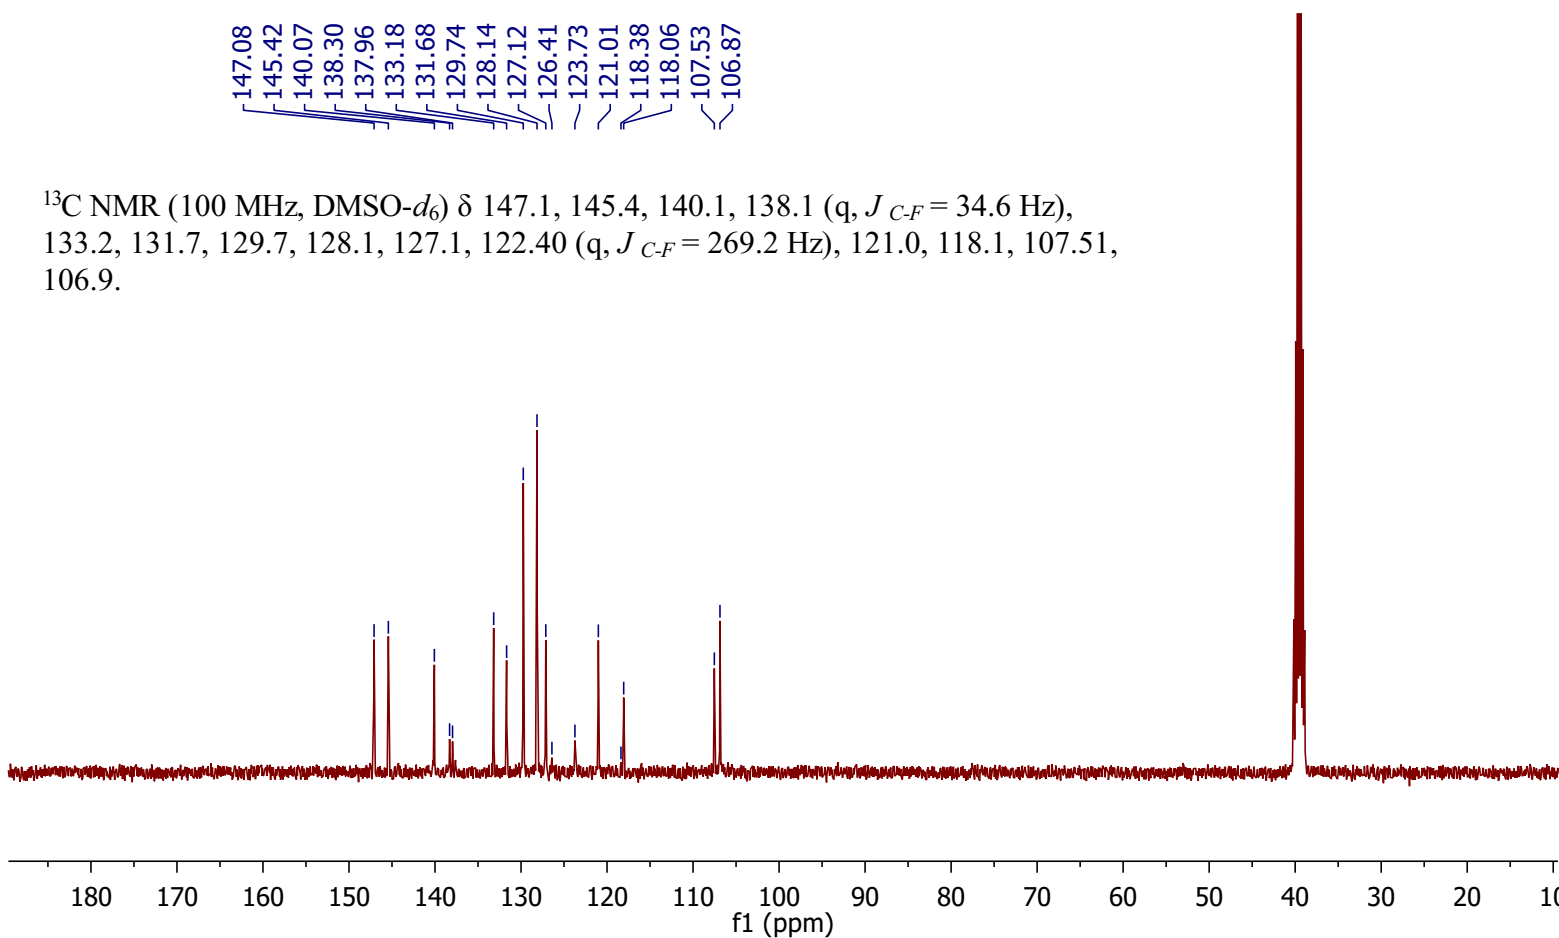



**Compound 22** 4-(4-(4-hydroxyphenyl)-1H-pyrazol-3-yl)benzene-1,2,3-triol

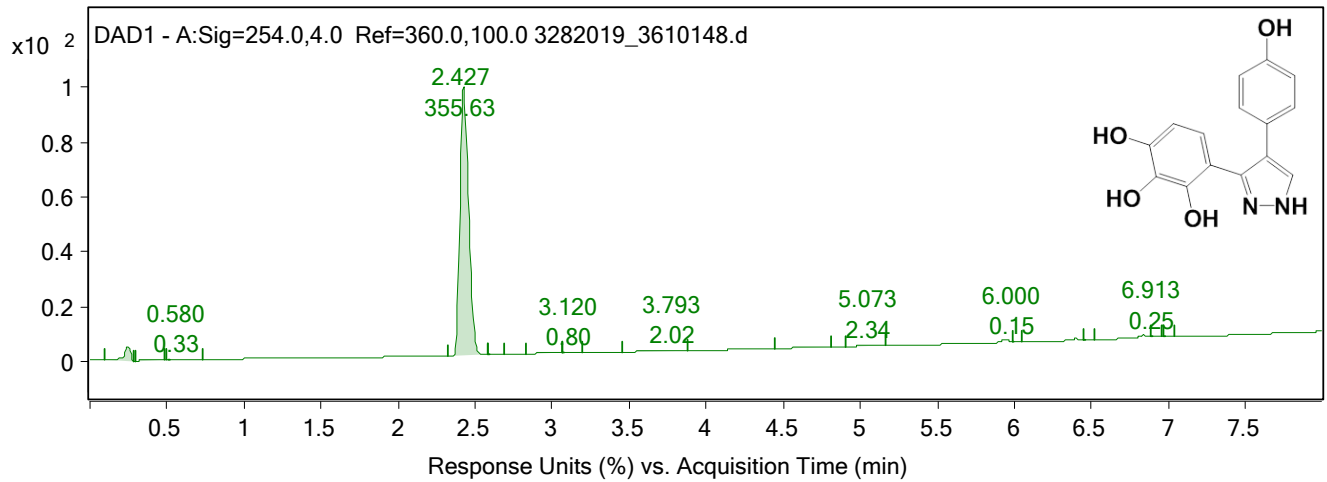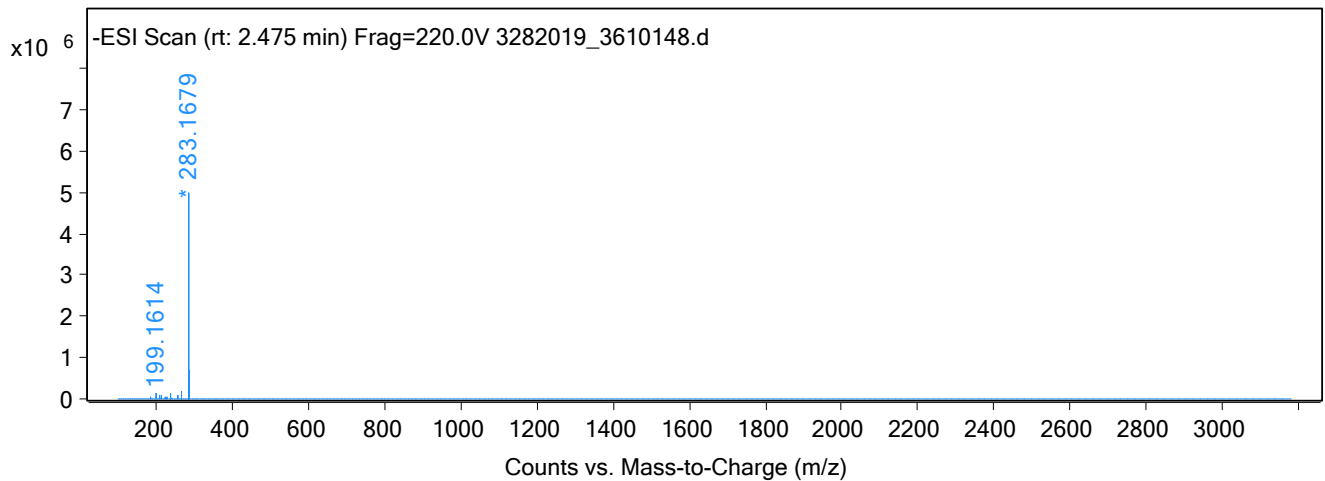

**Integration Peak List**

| Peak | Start | RT    | End   | Height | Area   | Area % |
|------|-------|-------|-------|--------|--------|--------|
| 1    | 0.093 | 0.247 | 0.287 | 4.82   | 14.89  | 4.19   |
| 2    | 0.293 | 0.4   | 0.48  | 0.43   | 4.04   | 1.14   |
| 3    | 0.5   | 0.58  | 0.727 | 0.05   | 0.33   | 0.09   |
| 4    | 2.32  | 2.427 | 2.587 | 91.39  | 355.63 | 100    |
| 5    | 2.587 | 2.633 | 2.693 | 0.07   | 0.24   | 0.07   |
| 6    | 2.827 | 2.967 | 3.06  | 0.32   | 2.16   | 0.61   |
| 7    | 3.067 | 3.12  | 3.193 | 0.2    | 0.8    | 0.22   |
| 8    | 3.46  | 3.793 | 3.873 | 0.1    | 2.02   | 0.57   |
| 9    | 4.447 | 4.68  | 4.813 | 0.51   | 4.52   | 1.27   |
| 10   | 4.9   | 5.073 | 5.16  | 0.25   | 2.34   | 0.66   |
| 11   | 5.987 | 6     | 6.053 | 0.06   | 0.15   | 0.04   |
| 12   | 6.453 | 6.487 | 6.52  | 0.04   | 0.1    | 0.03   |
| 13   | 6.887 | 6.913 | 6.96  | 0.12   | 0.25   | 0.07   |
| 14   | 6.967 | 7     | 7.033 | 0.02   | 0.03   | 0.01   |

**Peak List**

| m/z      | z | Abund      |
|----------|---|------------|
| 199.1614 |   | 133785.14  |
| 209.1476 |   | 71467.51   |
| 211.1645 |   | 71605.52   |
| 237.1499 |   | 139822.99  |
| 239.1663 |   | 54867.4    |
| 255.164  |   | 71673.36   |
| 265.1525 |   | 163328.78  |
| 283.1679 | 1 | 5025705.41 |
| 284.1708 | 1 | 765941.57  |
| 285.1737 | 1 | 79891      |

8.50

7.12  
7.09  
6.69  
6.67  
6.46  
6.44  
6.36  
6.34

$^1\text{H}$  NMR (400 MHz,  $\text{DMSO-}d_6+\text{CF}_3\text{SO}_3\text{H}$ ):  $\delta$  8.50 (s, 1H), 7.10 (d,  $J = 8.6$  Hz, 2H), 6.68 (d,  $J = 8.6$  Hz, 2H), 6.45 (d,  $J = 8.4$  Hz, 1H), 6.35 (d,  $J = 8.4$  Hz, 1H).

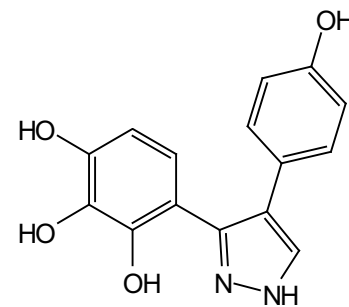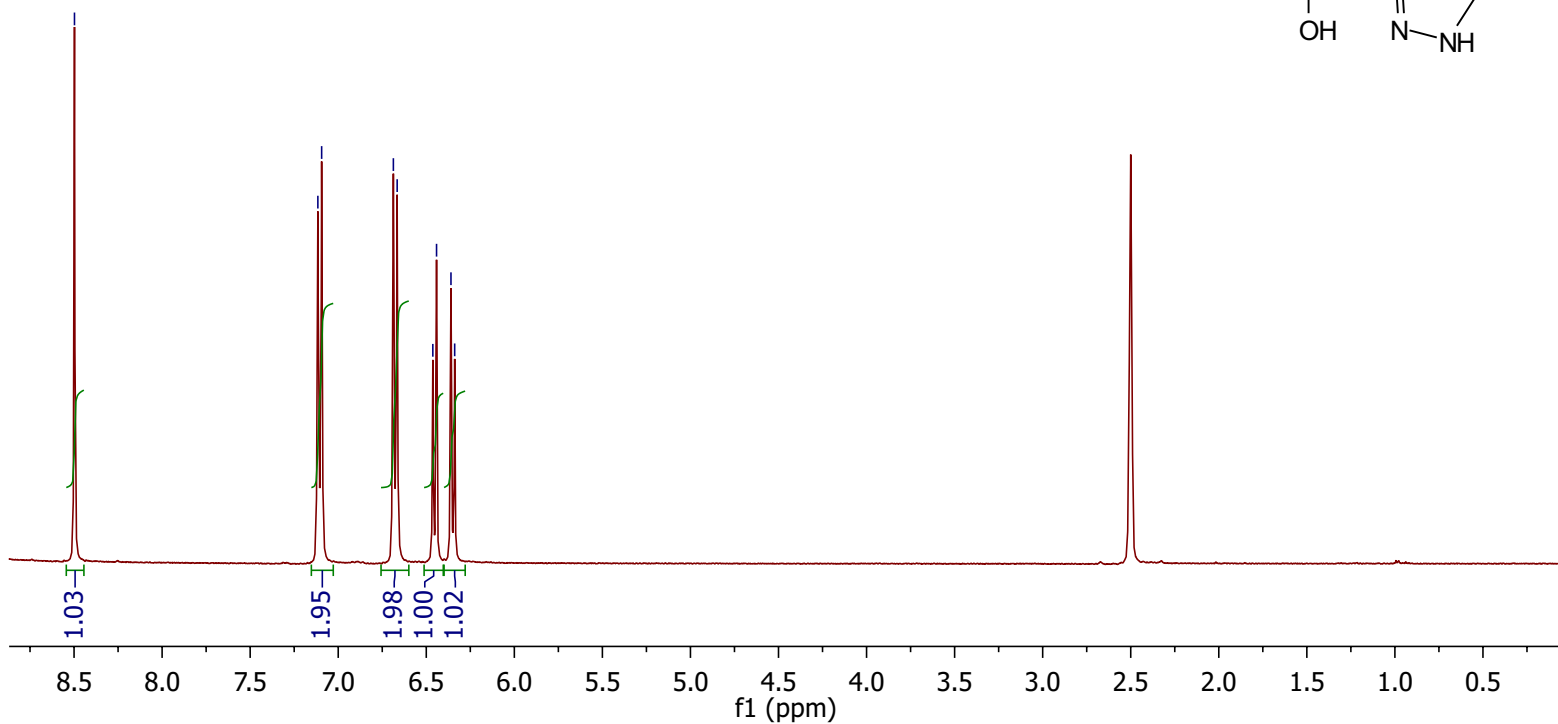

157.62  
148.79  
145.94  
141.04  
134.02  
132.32  
129.29  
121.80  
121.40  
121.30  
116.13  
108.07  
106.07

$^{13}\text{C}$  NMR (100 MHz,  $\text{DMSO-}d_6+\text{CF}_3\text{SO}_3\text{H}$ ):  $\delta$  157.6, 148.8, 145.9, 141.0, 134.0, 132.3, 129.3, 121.8, 121.4, 121.3, 116.1, 108.1, 106.1.

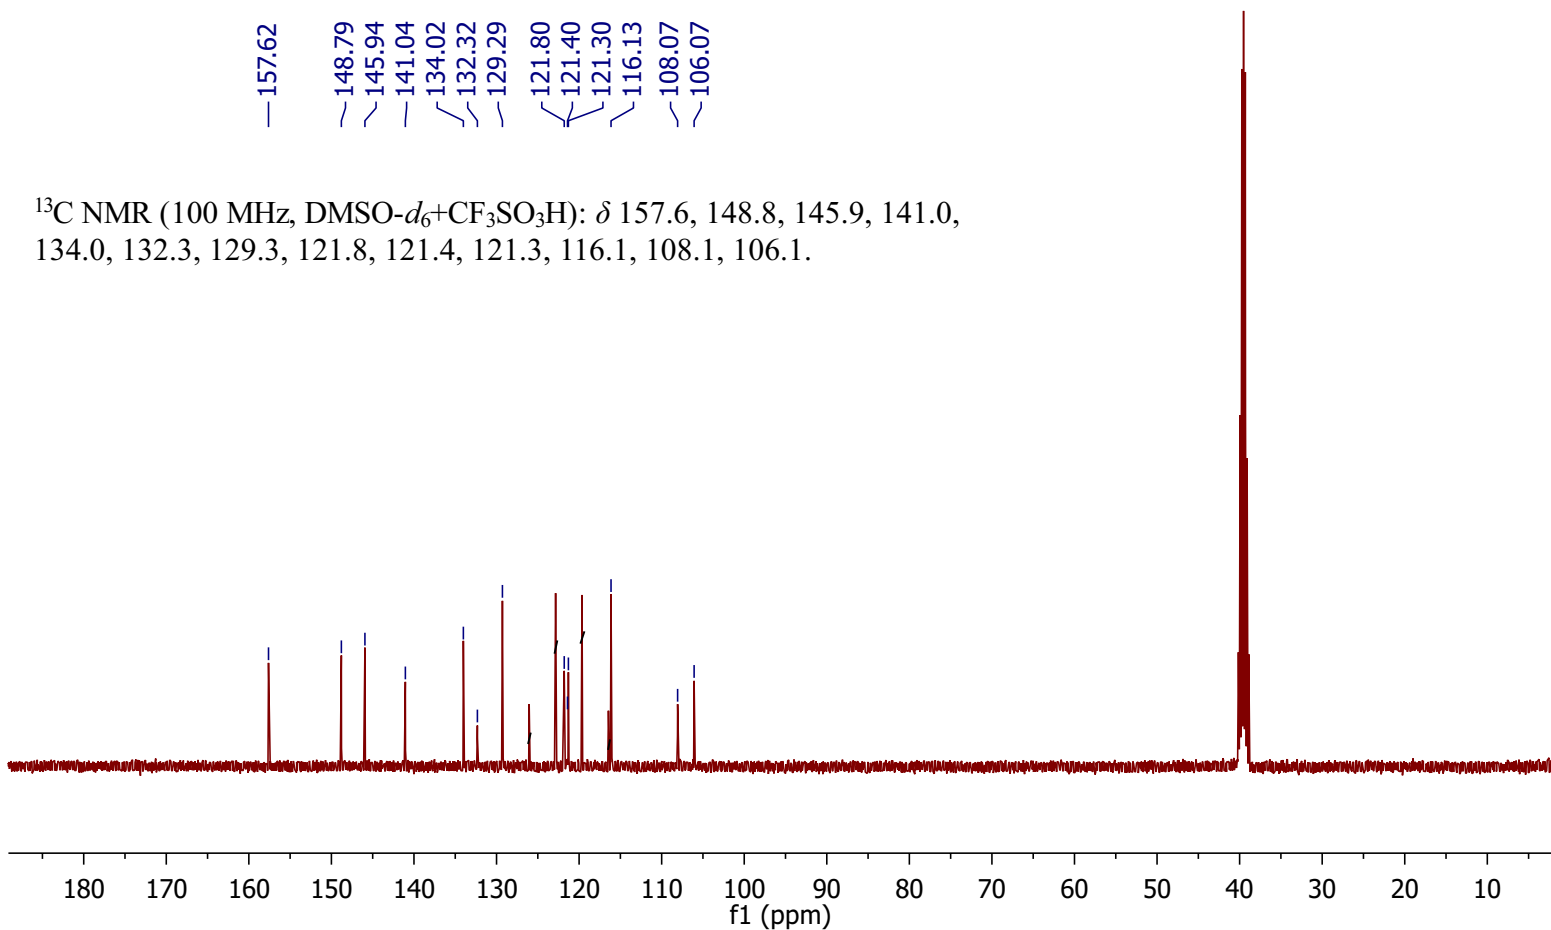

**Compound 23** 4-(4-(4-hydroxyphenyl)-5-(trifluoromethyl)-1H-pyrazol-3-yl)benzene-1,2,3-triol

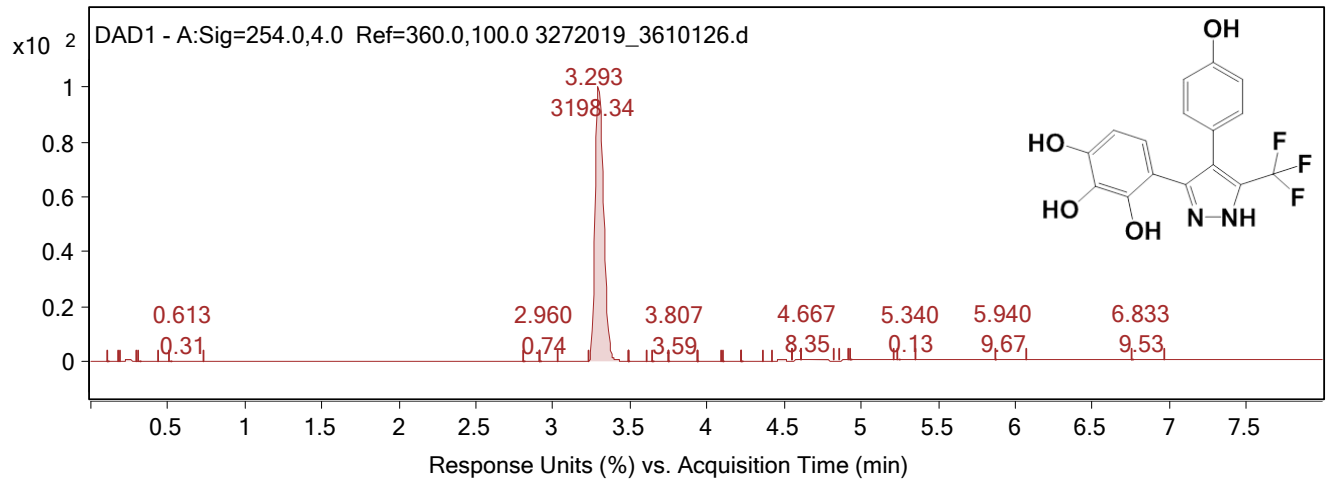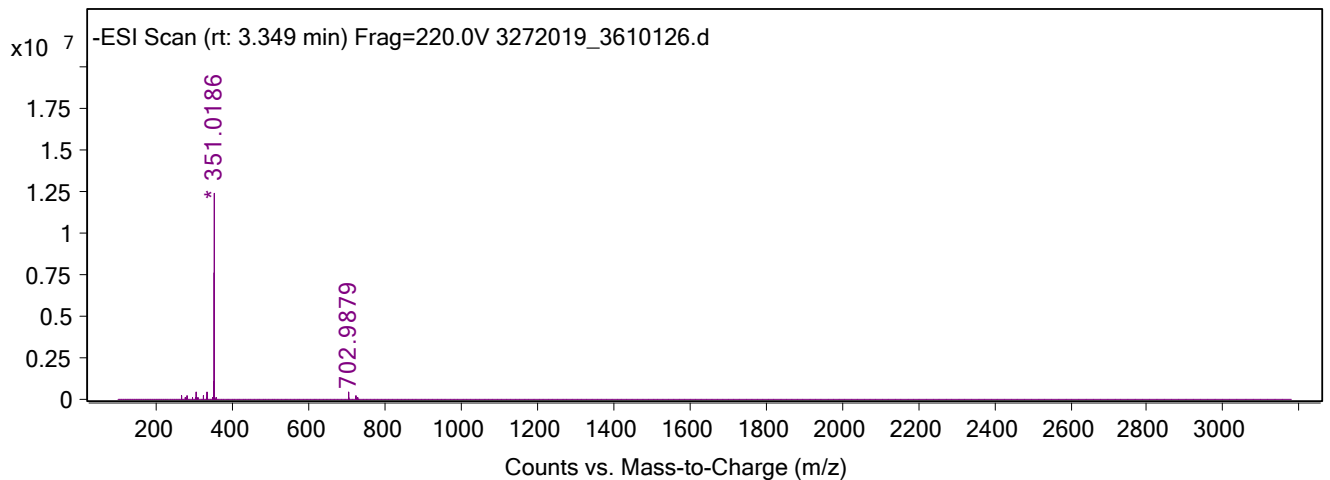

**Integration Peak List**

| Peak | Start | RT    | End   | Height | Area    | Area % |
|------|-------|-------|-------|--------|---------|--------|
| 1    | 0.107 | 0.153 | 0.18  | 0.04   | 0.11    | 0      |
| 2    | 0.187 | 0.247 | 0.3   | 8.93   | 24.11   | 0.75   |
| 3    | 0.307 | 0.4   | 0.433 | 0.09   | 0.83    | 0.03   |
| 4    | 0.507 | 0.613 | 0.727 | 0.05   | 0.31    | 0.01   |
| 5    | 2.807 | 2.893 | 2.913 | 0.1    | 0.44    | 0.01   |
| 6    | 2.913 | 2.96  | 3.033 | 0.22   | 0.74    | 0.02   |
| 7    | 3.227 | 3.293 | 3.487 | 818.94 | 3198.34 | 100    |
| 8    | 3.487 | 3.52  | 3.607 | 0.13   | 0.55    | 0.02   |
| 9    | 3.647 | 3.72  | 3.747 | 0.12   | 0.49    | 0.02   |
| 10   | 3.747 | 3.807 | 3.933 | 0.71   | 3.59    | 0.11   |
| 11   | 3.933 | 3.987 | 4.093 | 0.56   | 2.32    | 0.07   |
| 12   | 4.1   | 4.187 | 4.22  | 0.15   | 0.87    | 0.03   |
| 13   | 4.22  | 4.28  | 4.367 | 0.16   | 0.72    | 0.02   |
| 14   | 4.427 | 4.48  | 4.547 | 0.8    | 2.85    | 0.09   |
| 15   | 4.553 | 4.593 | 4.607 | 0.1    | 0.27    | 0.01   |
| 16   | 4.607 | 4.667 | 4.827 | 1.64   | 8.35    | 0.26   |
| 17   | 4.853 | 4.907 | 4.92  | 0.05   | 0.2     | 0.01   |
| 18   | 4.927 | 5.073 | 5.207 | 0.44   | 2.71    | 0.08   |
| 19   | 5.24  | 5.34  | 5.347 | 0.01   | 0.13    | 0      |
| 20   | 5.867 | 5.94  | 6.073 | 1.88   | 9.67    | 0.3    |
| 21   | 6.76  | 6.833 | 6.973 | 1.81   | 9.53    | 0.3    |

**Peak List**

| m/z      | z | Abund       |
|----------|---|-------------|
| 267.0419 |   | 197900.13   |
| 279.0393 |   | 175983.54   |
| 305.013  |   | 480303.1    |
| 323.0194 |   | 240414.58   |
| 333.0017 |   | 486855.61   |
| 351.0186 |   | 13077913.86 |
| 352.0125 | 1 | 7710646.48  |
| 353.0129 | 1 | 1082562.77  |
| 702.9879 | 1 | 446692.75   |
| 724.9646 |   | 225039.39   |

—13.32

9.36  
9.31  
8.63  
8.45  
6.98  
6.96  
6.68  
6.66  
6.26  
6.24  
6.22  
6.20

$^1\text{H}$  NMR (400 MHz,  $\text{DMSO-}d_6$ ):  $\delta$  13.32 (s, 1H), 9.36 (s, 1H), 9.31 (s, 1H), 8.63 (s, 1H), 8.45 (s, 1H), 6.97 (d,  $J = 8.1$  Hz, 2H), 6.67 (d,  $J = 8.1$  Hz, 2H), 6.25 (d,  $J = 8.4$  Hz, 1H), 6.21 (d,  $J = 8.4$  Hz, 1H).

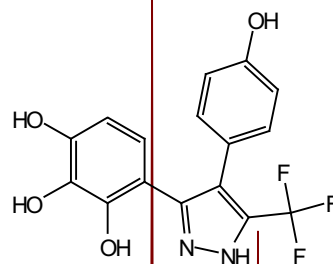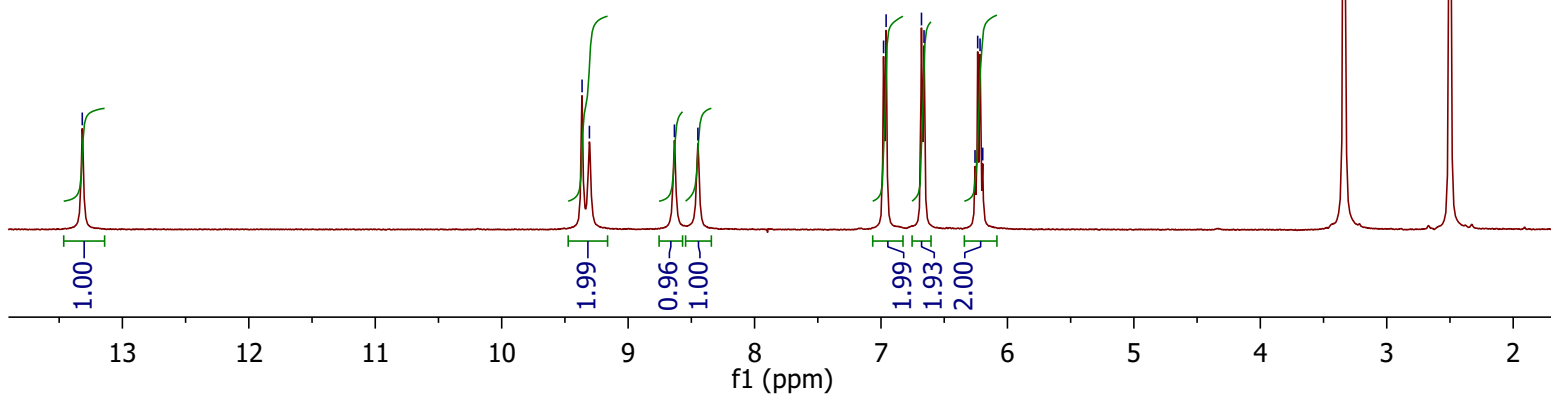

156.62  
147.04  
145.46  
139.81  
138.67  
138.40  
138.13  
137.86  
133.24  
131.00  
125.80  
123.66  
122.10  
121.52  
121.11  
119.38  
118.17  
115.17  
107.92  
106.97

$^{13}\text{C}$  NMR (125 MHz,  $\text{DMSO-}d_6$ ):  $\delta$  156.6, 147.0, 145.5, 139.8, 138.3 (q,  $J_{\text{C-F}} = 34.2$  Hz), 133.2, 131.0, 122.6 (q,  $J_{\text{C-F}} = 269.0$  Hz), 122.1, 121.1, 118.2, 115.2, 107.9, 107.0.

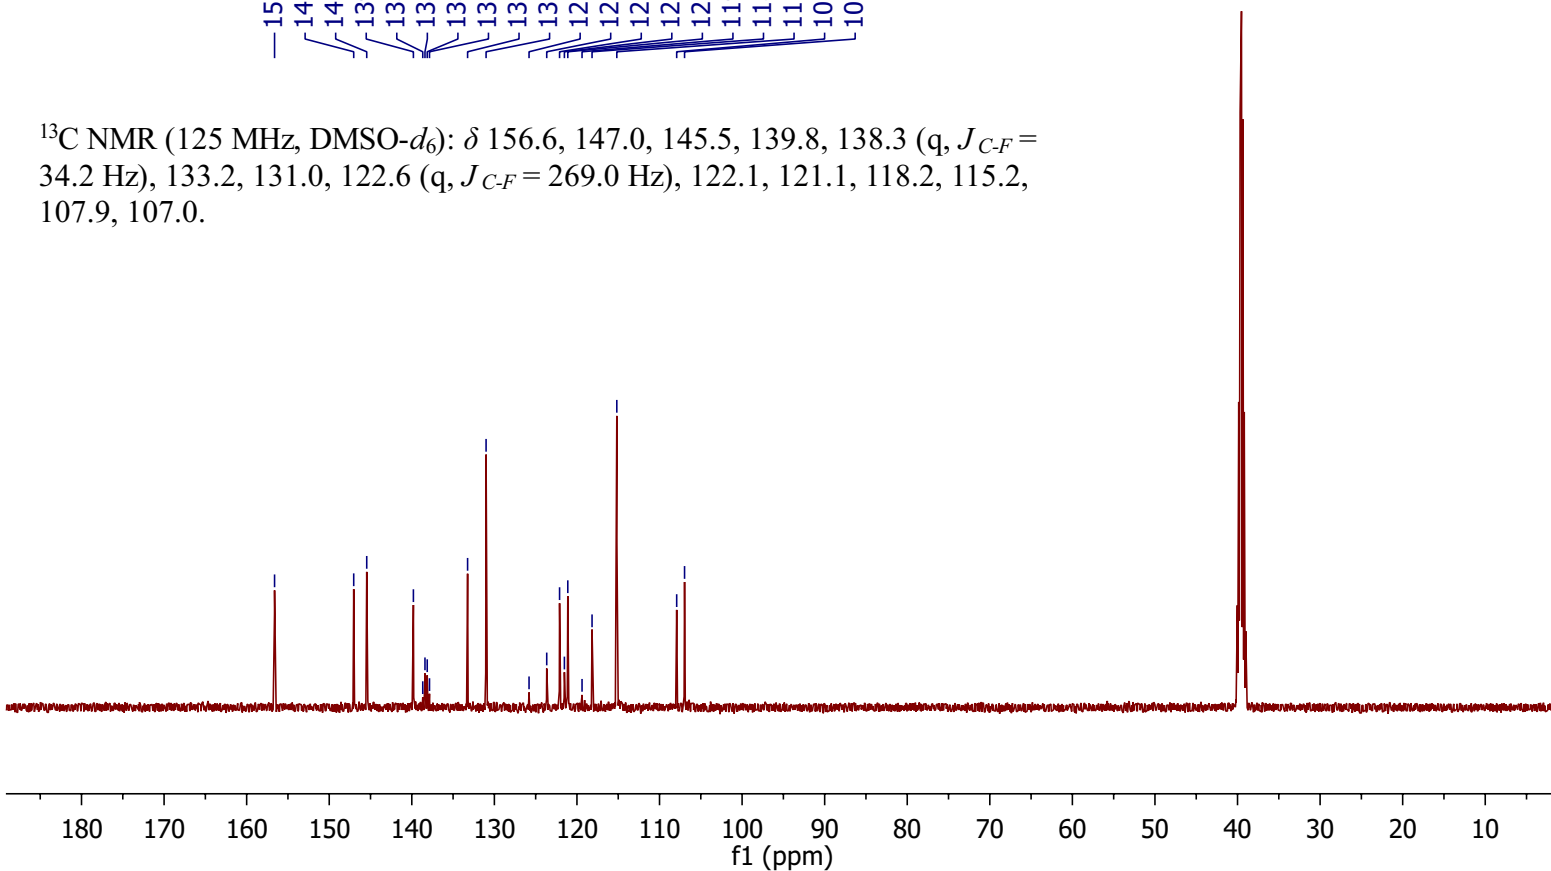

**Compound 24** 4-fluoro-6-(4-(4-hydroxyphenyl)-5-(trifluoromethyl)-1H-pyrazol-3-yl)benzene-1,3-diol

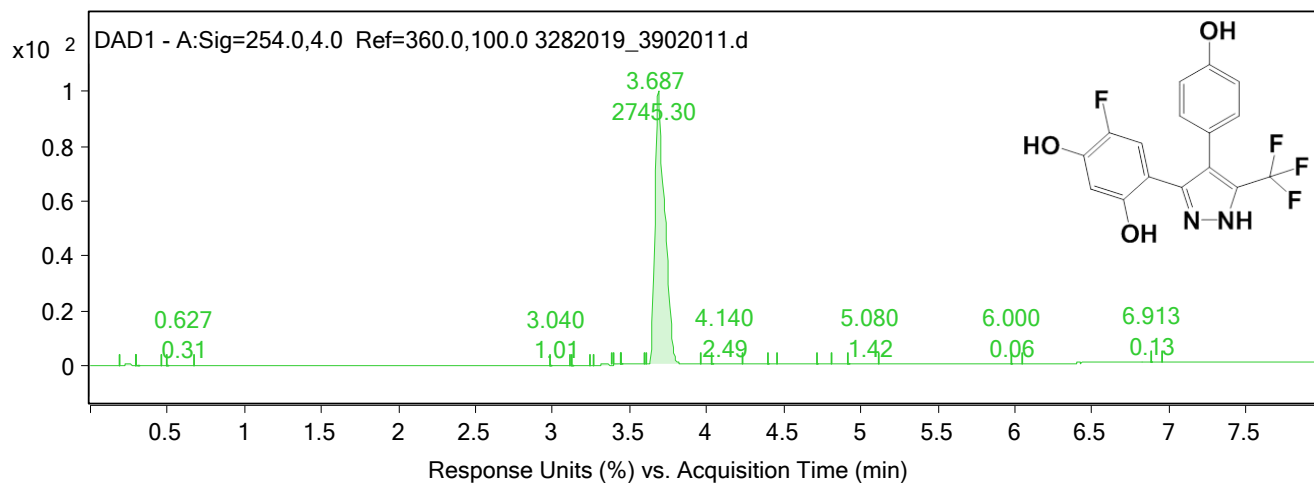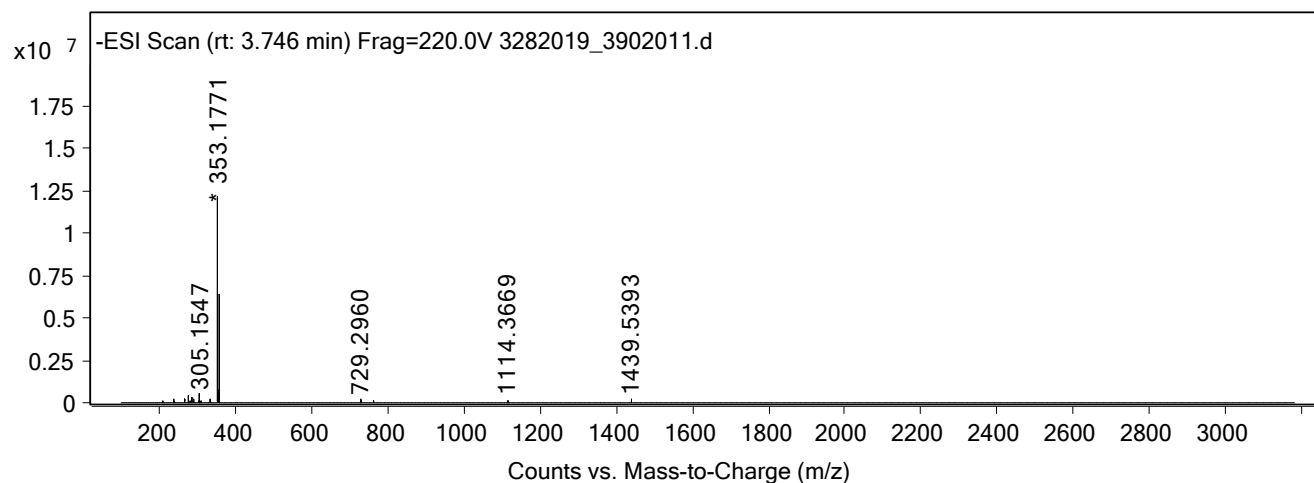

**Integration Peak List**

| Peak | Start | RT    | End   | Height | Area   | Area % |
|------|-------|-------|-------|--------|--------|--------|
| 1    | 0.193 | 0.247 | 0.3   | 6.3    | 16.4   | 0.6    |
| 2    | 0.3   | 0.433 | 0.46  | 0.09   | 1.57   | 0.06   |
| 3    | 0.493 | 0.627 | 0.667 | 0.03   | 0.31   | 0.01   |
| 4    | 2.987 | 3.04  | 3.113 | 0.28   | 1.01   | 0.04   |
| 5    | 3.127 | 3.22  | 3.247 | 0.04   | 0.33   | 0.01   |
| 6    | 3.26  | 3.347 | 3.387 | 0.12   | 0.73   | 0.03   |
| 7    | 3.393 | 3.433 | 3.447 | 0.08   | 0.21   | 0.01   |
| 8    | 3.447 | 3.493 | 3.6   | 1.23   | 4.91   | 0.18   |
| 9    | 3.613 | 3.687 | 3.96  | 609.62 | 2745.3 | 100    |
| 10   | 4.033 | 4.14  | 4.233 | 0.43   | 2.49   | 0.09   |
| 11   | 4.393 | 4.433 | 4.453 | 0.03   | 0.07   | 0      |
| 12   | 4.713 | 4.733 | 4.807 | 0.02   | 0.07   | 0      |
| 13   | 4.92  | 5.08  | 5.113 | 0.1    | 1.42   | 0.05   |
| 14   | 5.973 | 6     | 6.047 | 0.03   | 0.06   | 0      |
| 15   | 6.88  | 6.913 | 6.96  | 0.05   | 0.13   | 0      |

**Peak List**

| m/z      | z | Abund       |
|----------|---|-------------|
| 265.1224 |   | 236298.67   |
| 265.1502 |   | 280166.26   |
| 277.1539 |   | 417478.48   |
| 285.1344 |   | 279586.85   |
| 305.1547 |   | 535361.23   |
| 333.1576 |   | 263809.36   |
| 353.1771 |   | 12163543.26 |
| 354.1729 | 1 | 6534368.56  |
| 355.1747 | 1 | 765438.06   |
| 729.296  |   | 223606.97   |

—13.41

—10.02  
—9.75  
—9.46

7.00  
6.98  
6.73  
6.71  
6.67  
6.64  
6.55  
6.53

$^1\text{H}$  NMR (400 MHz,  $\text{DMSO-}d_6$ ):  $\delta$  13.41 (s, 1H), 10.02 (s, 1H), 9.75 (s, 1H), 9.46 (s, 1H), 6.99 (d,  $J = 8.2$  Hz, 2H), 6.72 (d,  $J = 8.2$  Hz, 2H), 6.65 (d,  $J = 11.9$  Hz, 1H), 6.54 (d,  $J = 7.9$  Hz, 1H).

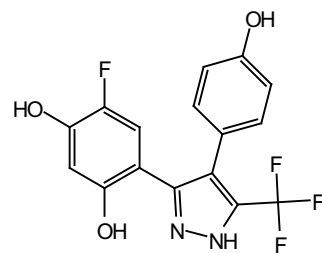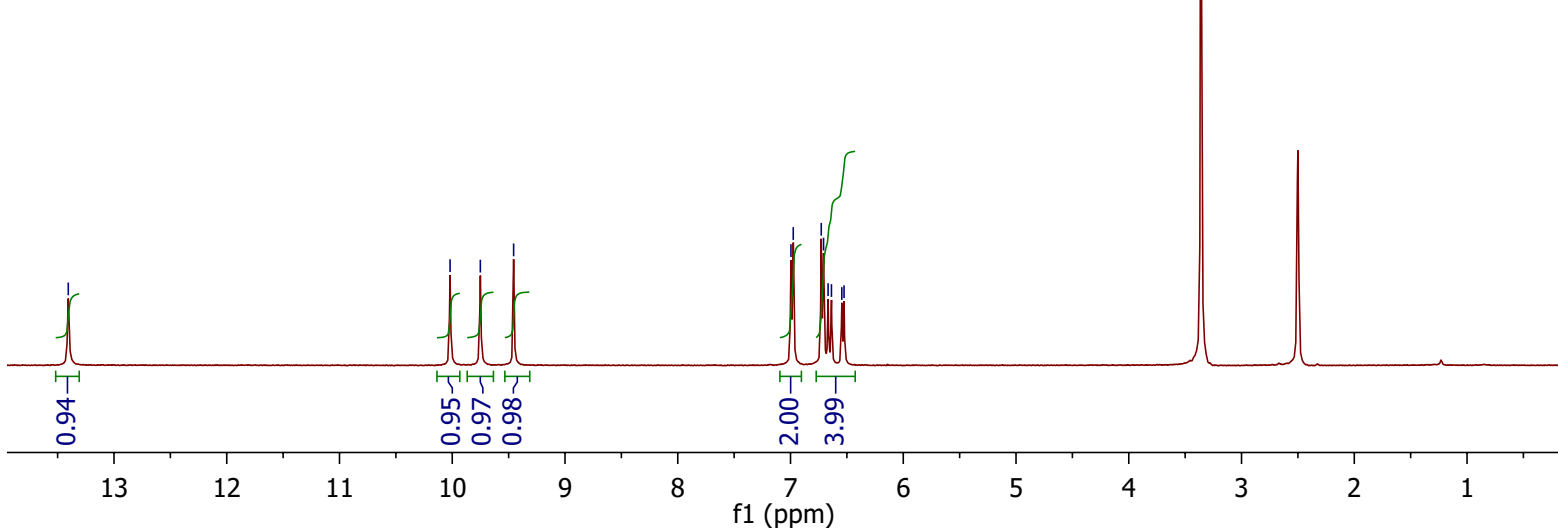

156.66  
152.15  
146.13  
145.95  
145.72  
142.65  
138.81  
138.28  
137.90  
137.45  
130.83  
127.64  
124.07  
121.57  
120.51  
117.97  
117.26  
116.99  
115.15  
105.55  
105.46  
104.60  
104.56

$^{13}\text{C}$  NMR (75 MHz,  $\text{DMSO-}d_6$ ):  $\delta$  156.7, 152.2, 146.0 (d,  $J_{\text{C-F}} = 13.3$  Hz), 144.2 (d,  $J_{\text{C-F}} = 231.7$  Hz), 138.3, 138.1 (q,  $J_{\text{C-F}} = 32.3$  Hz), 130.8, 122.3 (q,  $J_{\text{C-F}} = 269.0$  Hz), 121.6, 118.0, 117.1 (d,  $J_{\text{C-F}} = 20.3$  Hz), 115.2, 105.5 (d,  $J_{\text{C-F}} = 6.8$  Hz), 104.6 (d,  $J_{\text{C-F}} = 2.6$  Hz).

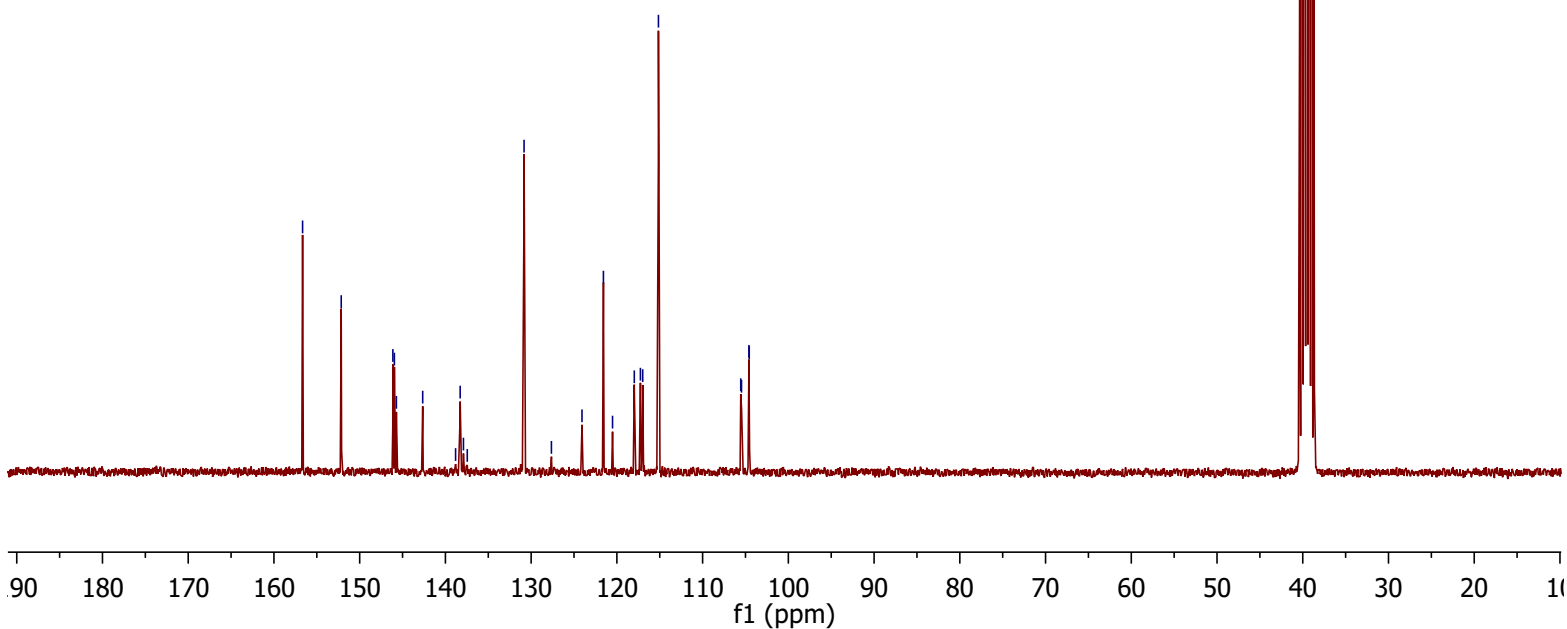

**Compound 25** 4-(5-(trifluoromethyl)-3-(2,3,4-trihydroxyphenyl)-1H-pyrazol-4-yl)benzonitrile

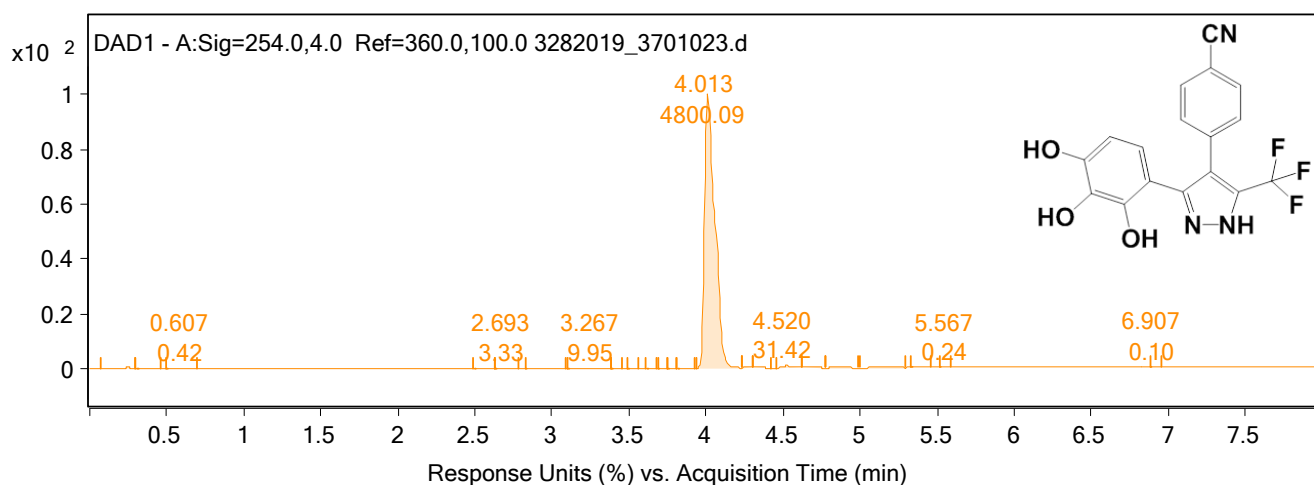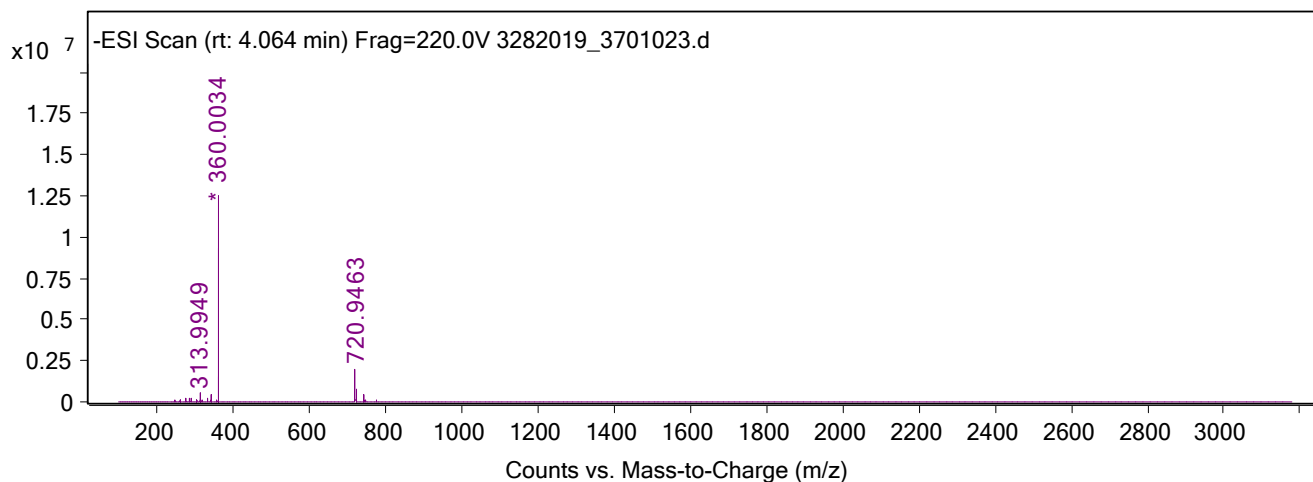

**Integration Peak List**

| Peak | Start | RT    | End   | Height  | Area    | Area % |
|------|-------|-------|-------|---------|---------|--------|
| 1    | 0.067 | 0.247 | 0.3   | 6.59    | 19.2    | 0.4    |
| 2    | 0.3   | 0.42  | 0.46  | 0.13    | 1.58    | 0.03   |
| 3    | 0.493 | 0.607 | 0.7   | 0.05    | 0.42    | 0.01   |
| 4    | 2.493 | 2.553 | 2.633 | 1.07    | 3.74    | 0.08   |
| 5    | 2.633 | 2.693 | 2.787 | 0.9     | 3.33    | 0.07   |
| 6    | 2.827 | 3.007 | 3.087 | 0.54    | 2.78    | 0.06   |
| 7    | 3.1   | 3.267 | 3.387 | 1.88    | 9.95    | 0.21   |
| 8    | 3.387 | 3.433 | 3.46  | 0.07    | 0.18    | 0      |
| 9    | 3.493 | 3.547 | 3.56  | 0.05    | 0.21    | 0      |
| 10   | 3.613 | 3.66  | 3.68  | 0.16    | 0.44    | 0.01   |
| 11   | 3.687 | 3.72  | 3.747 | 0.11    | 0.24    | 0.01   |
| 12   | 3.753 | 3.793 | 3.813 | 0.15    | 0.38    | 0.01   |
| 13   | 3.813 | 3.853 | 3.927 | 0.51    | 1.53    | 0.03   |
| 14   | 3.94  | 4.013 | 4.227 | 1034.68 | 4800.09 | 100    |
| 15   | 4.233 | 4.273 | 4.3   | 0.93    | 2.22    | 0.05   |
| 16   | 4.3   | 4.333 | 4.42  | 1.26    | 3.69    | 0.08   |
| 17   | 4.46  | 4.52  | 4.62  | 7.61    | 31.42   | 0.65   |
| 18   | 4.62  | 4.66  | 4.773 | 2.1     | 8.8     | 0.18   |
| 19   | 4.78  | 4.833 | 4.987 | 2.95    | 13.66   | 0.28   |
| 20   | 4.993 | 5.113 | 5.293 | 0.45    | 2.99    | 0.06   |
| 21   | 5.333 | 5.42  | 5.46  | 0.07    | 0.33    | 0.01   |
| 22   | 5.513 | 5.567 | 5.593 | 0.07    | 0.24    | 0      |
| 23   | 6.88  | 6.907 | 6.953 | 0.04    | 0.1     | 0      |

**Peak List**

| m/z      | z | Abund       |
|----------|---|-------------|
| 288.0229 |   | 227295.06   |
| 313.9949 |   | 551182.42   |
| 332.0006 |   | 260601.7    |
| 341.9823 |   | 433758.65   |
| 360.0034 |   | 12975079.68 |
| 360.9934 | 1 | 9351257.86  |
| 361.9926 | 1 | 1584991.85  |
| 720.9463 | 1 | 2048183.42  |
| 721.9492 | 1 | 745496.14   |
| 742.9219 | 1 | 392500.68   |

—13.70

—9.44  
—8.71  
—8.52  
—7.79  
—7.77  
—7.35  
—7.33  
—6.33  
—6.31  
—6.28  
—6.26

13.70 (s, 1H), 9.44 (s, 1H), 8.71 (s, 1H), 8.52 (s, 1H), 7.78 (d,  $J = 8.5$  Hz, 2H), 7.34 (d,  $J = 8.5$  Hz, 2H), 6.32 (d,  $J = 8.4$  Hz, 1H), 6.27 (d,  $J = 8.4$  Hz, 1H).

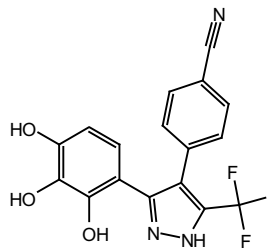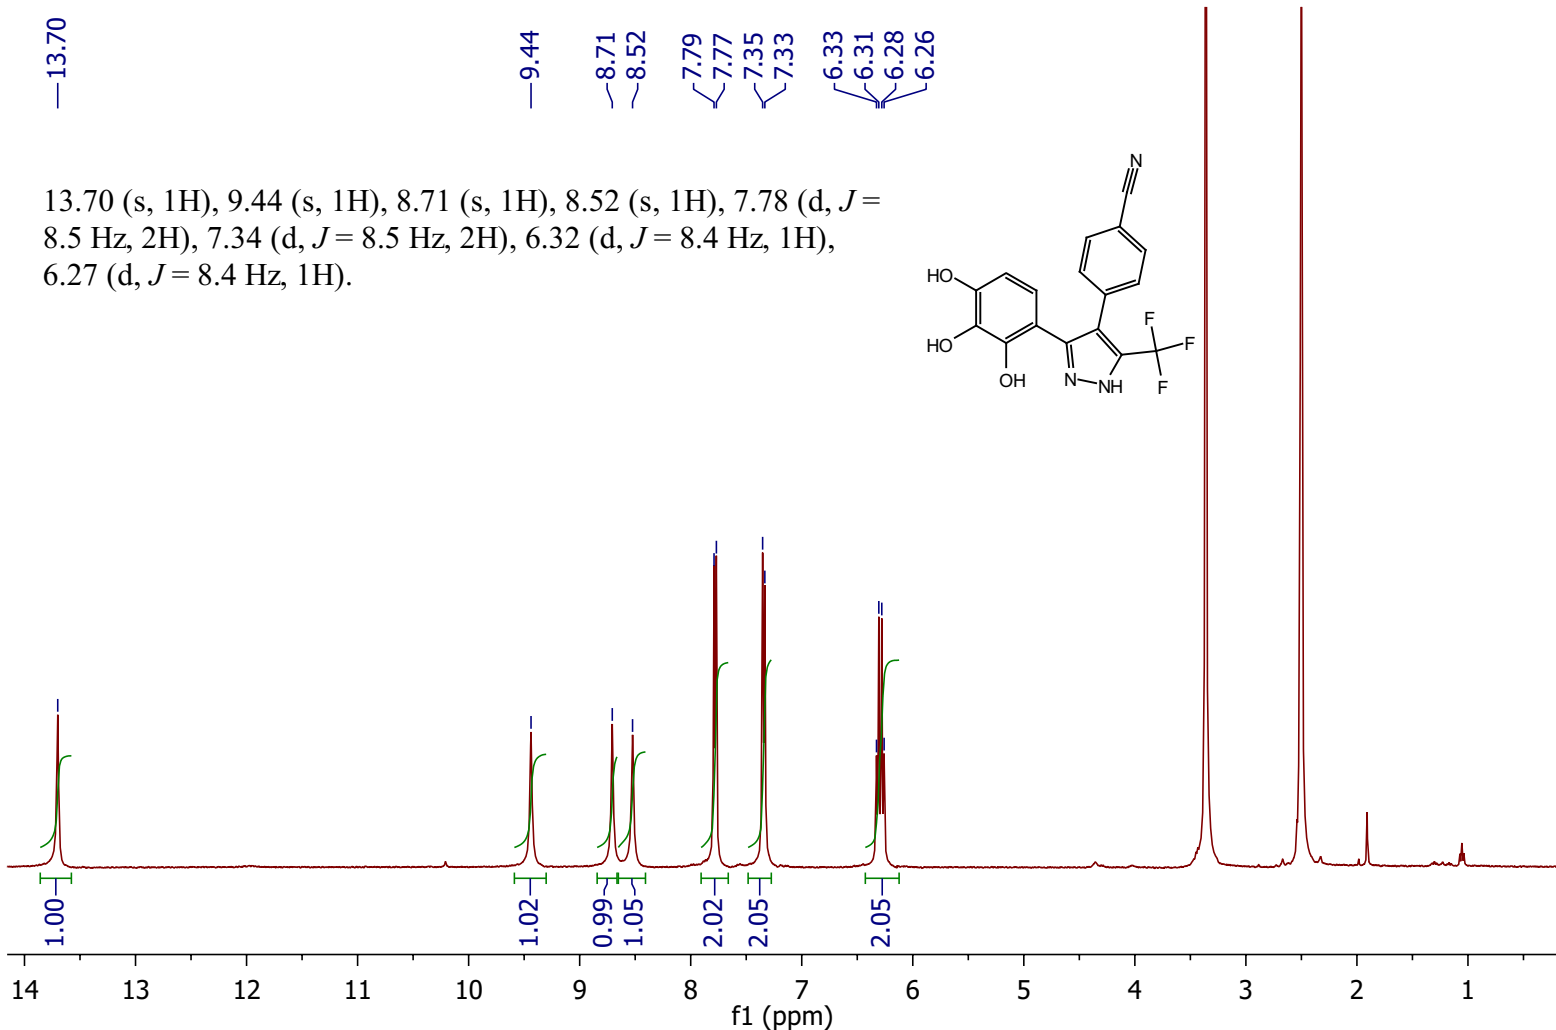

147.37  
145.17  
140.75  
138.53  
138.17  
137.83  
137.48  
136.99  
133.28  
132.04  
130.30  
126.07  
123.40  
120.85  
120.72  
118.76  
118.05  
116.51  
109.79  
107.09  
106.86

$^{13}\text{C}$  NMR (100 MHz,  $\text{DMSO-}d_6$ ):  $\delta$  147.4, 145.2, 140.8, 138.0 (q,  $J_{\text{C-F}} = 35.6$  Hz), 137.0, 133.3, 132.0, 130.3, 122.1 (q,  $J_{\text{C-F}} = 269.2$  Hz), 120.9, 118.8, 116.5, 109.8, 107.1, 106.9.

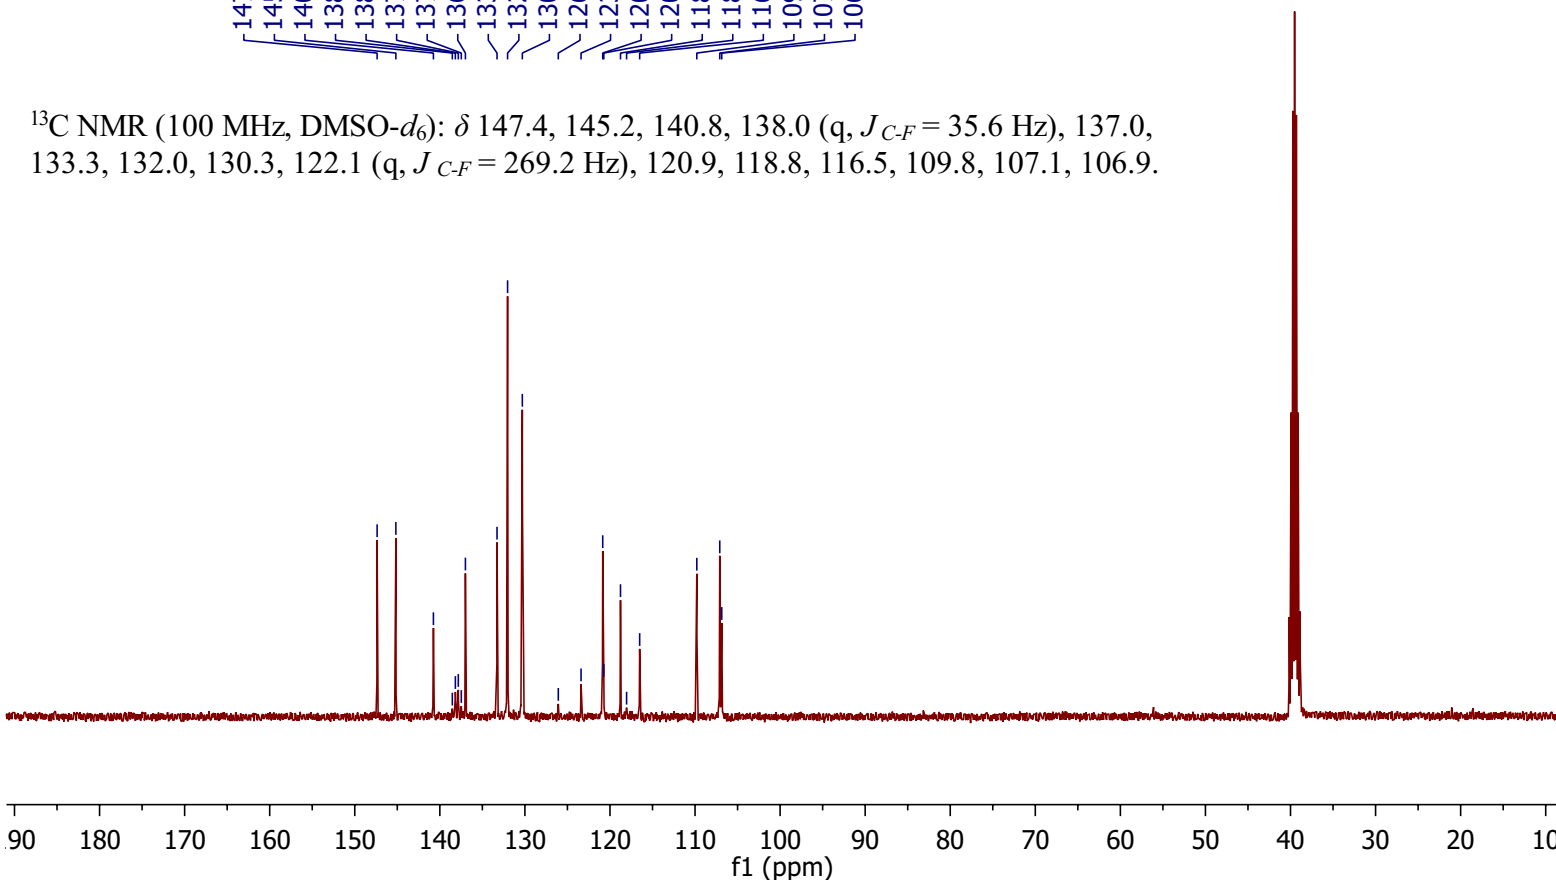



**Compound 26** 4-(4-(4-nitrophenyl)-1H-pyrazol-3-yl)benzene-1,2,3-triol

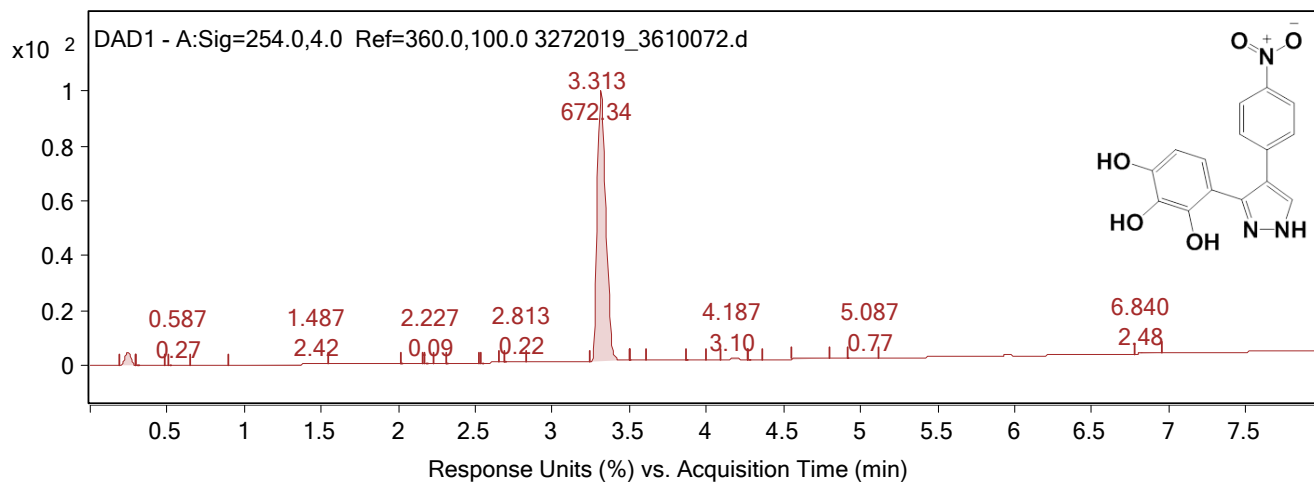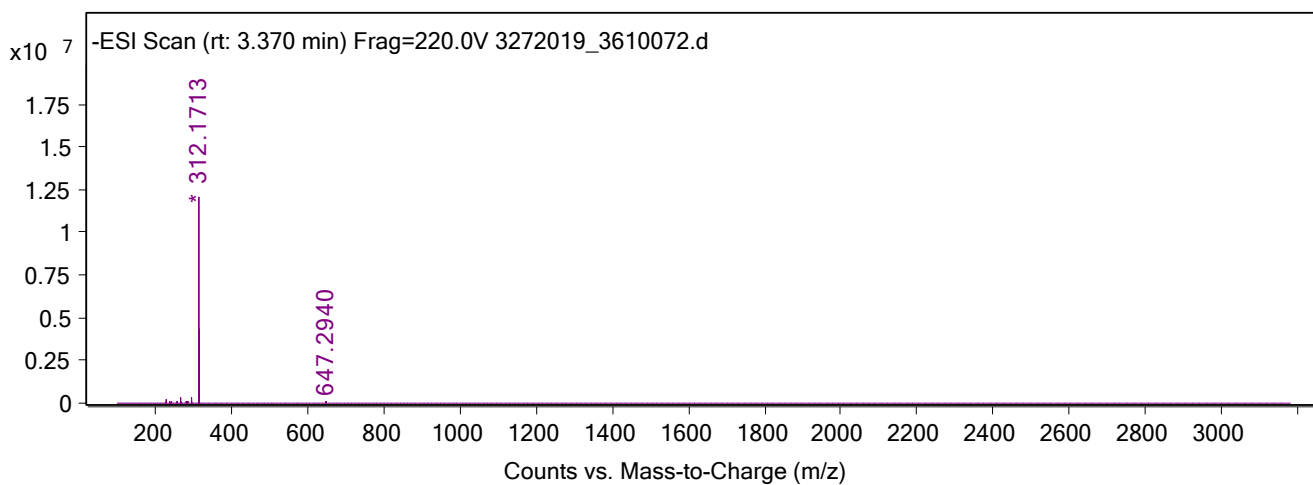

**Integration Peak List**

| Peak | Start | RT    | End   | Height | Area   | Area % |
|------|-------|-------|-------|--------|--------|--------|
| 1    | 0.187 | 0.247 | 0.3   | 8.66   | 23.22  | 3.45   |
| 2    | 0.3   | 0.447 | 0.48  | 0.08   | 1.49   | 0.22   |
| 3    | 0.507 | 0.587 | 0.653 | 0.05   | 0.27   | 0.04   |
| 4    | 0.9   | 1.487 | 1.547 | 0.18   | 2.42   | 0.36   |
| 5    | 2.013 | 2.12  | 2.153 | 0.05   | 0.33   | 0.05   |
| 6    | 2.173 | 2.227 | 2.233 | 0.01   | 0.09   | 0.01   |
| 7    | 2.307 | 2.507 | 2.52  | 0.01   | 0.2    | 0.03   |
| 8    | 2.54  | 2.64  | 2.653 | 0.03   | 0.27   | 0.04   |
| 9    | 2.687 | 2.813 | 2.833 | 0.03   | 0.22   | 0.03   |
| 10   | 3.24  | 3.313 | 3.5   | 171.78 | 672.34 | 100    |
| 11   | 3.5   | 3.547 | 3.613 | 0.05   | 0.16   | 0.02   |
| 12   | 3.867 | 3.92  | 4     | 0.23   | 0.97   | 0.14   |
| 13   | 4.093 | 4.187 | 4.273 | 0.63   | 3.1    | 0.46   |
| 14   | 4.273 | 4.327 | 4.36  | 0.03   | 0.1    | 0.01   |
| 15   | 4.553 | 4.693 | 4.793 | 0.29   | 1.71   | 0.25   |
| 16   | 4.913 | 5.087 | 5.113 | 0.06   | 0.77   | 0.11   |
| 17   | 6.773 | 6.84  | 6.953 | 0.43   | 2.48   | 0.37   |

**Peak List**

| m/z      | z | Abund       |
|----------|---|-------------|
| 228.1605 |   | 186391.07   |
| 240.1635 |   | 121382.05   |
| 266.1552 |   | 282896.51   |
| 284.1637 |   | 142283.46   |
| 294.1517 |   | 289947.33   |
| 312.1713 | 1 | 12076097.65 |
| 313.1701 | 1 | 4416678.09  |
| 314.1726 | 1 | 563241.03   |
| 647.294  |   | 142065.8    |

$\delta$  8.52  
 $\delta$  8.08  
 $\delta$  8.07  
 $\delta$  7.53  
 $\delta$  7.51  
 $\delta$  6.54  
 $\delta$  6.52  
 $\delta$  6.44  
 $\delta$  6.42

$^1\text{H NMR}$  (500 MHz,  $\text{DMSO-}d_6 + \text{CF}_3\text{SO}_3\text{H}$ ):  $\delta$  8.52 (s, 1H), 8.07 (d,  $J = 8.3$  Hz, 2H), 7.52 (d,  $J = 8.3$  Hz, 2H), 6.53 (d,  $J = 8.4$  Hz, 1H), 6.43 (d,  $J = 8.4$  Hz, 1H).

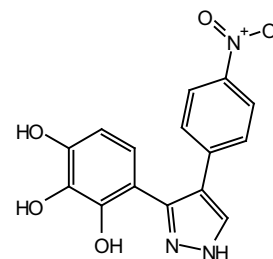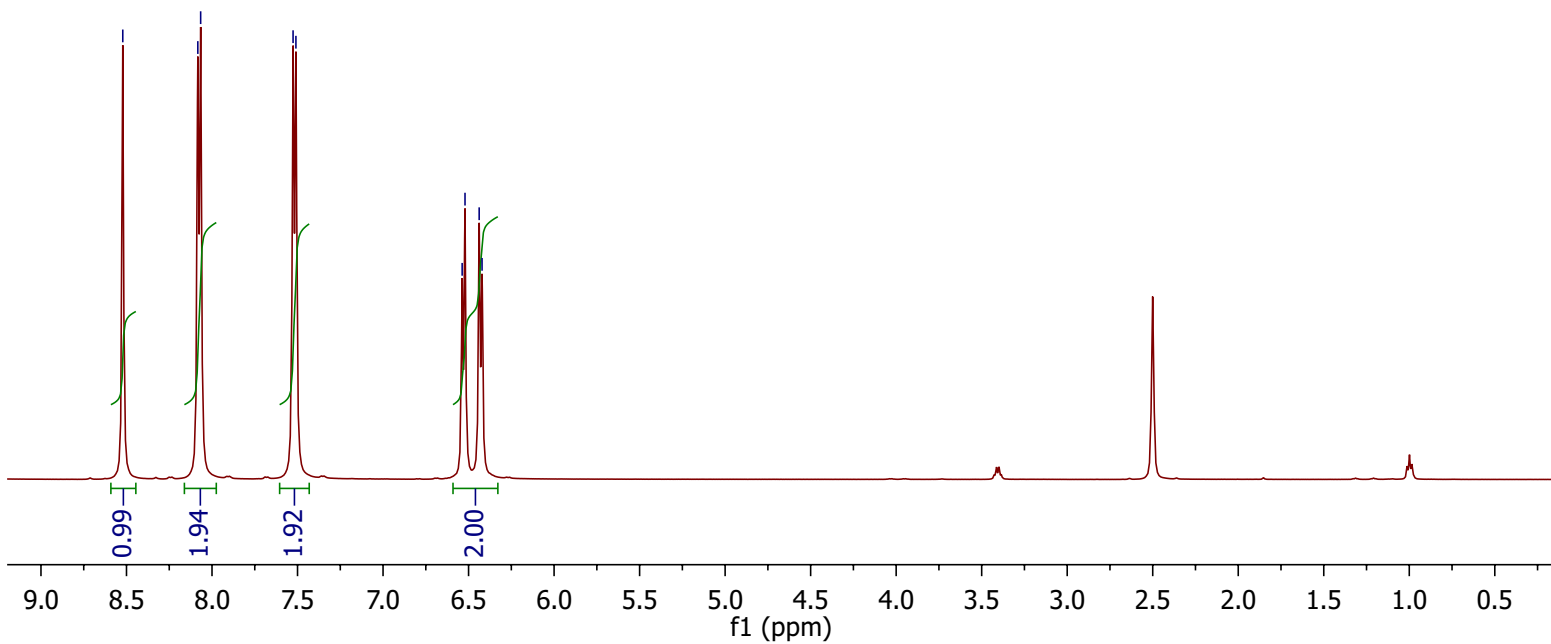

$\delta$  148.86  
 $\delta$  146.59  
 $\delta$  145.74  
 $\delta$  142.25  
 $\delta$  139.12  
 $\delta$  134.57  
 $\delta$  134.19  
 $\delta$  128.23  
 $\delta$  124.38  
 $\delta$  121.28  
 $\delta$  119.11  
 $\delta$  108.31  
 $\delta$  106.72

$^{13}\text{C NMR}$  (125 MHz,  $\text{DMSO-}d_6 + \text{CF}_3\text{SO}_3\text{H}$ ):  $\delta$  148.9, 146.6, 145.7, 142.3, 139.1, 134.6, 134.2, 128.2, 124.4, 121.3, 119.1, 108.3, 106.7.

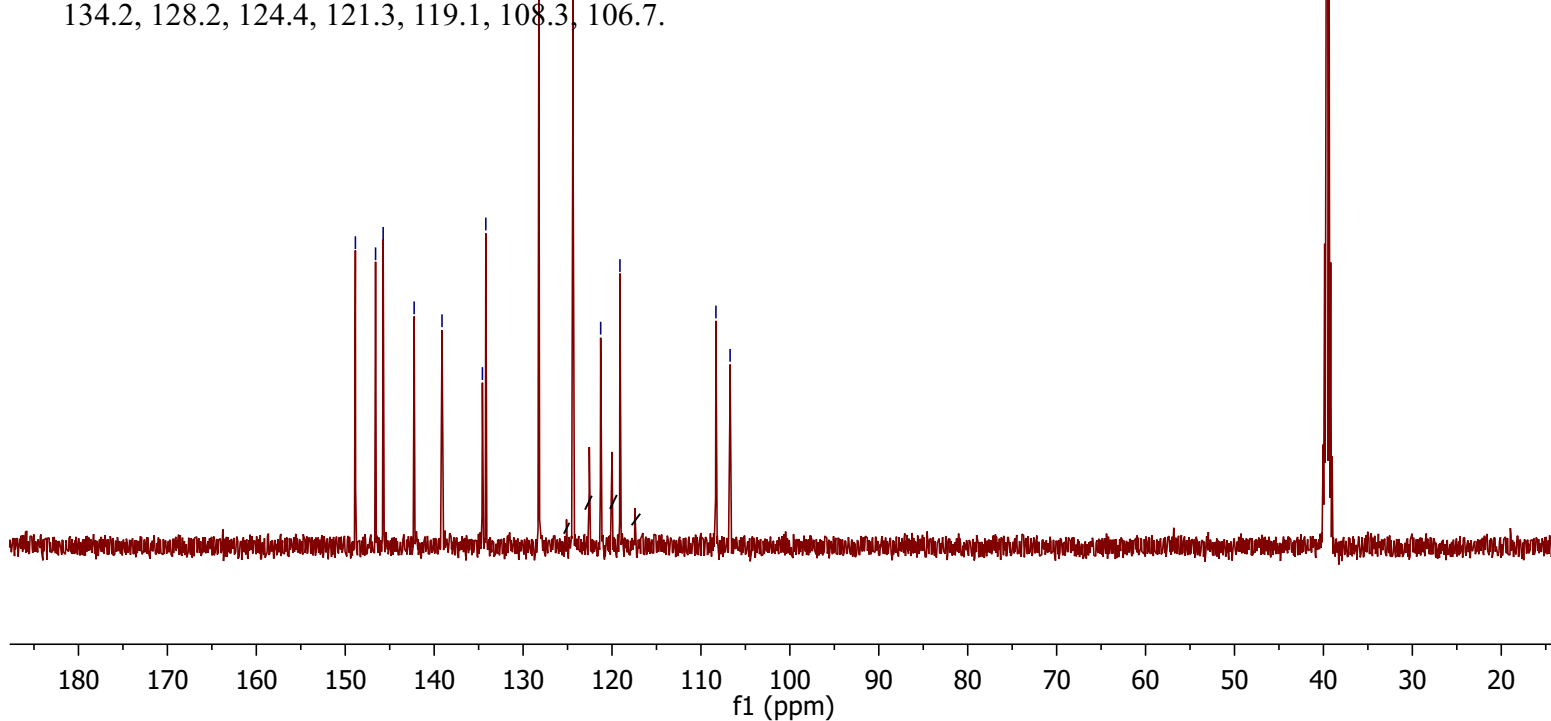

**Compound 27** 4-(4-(4-nitrophenyl)-5-(trifluoromethyl)-1H-pyrazol-3-yl)benzene-1,2,3-triol

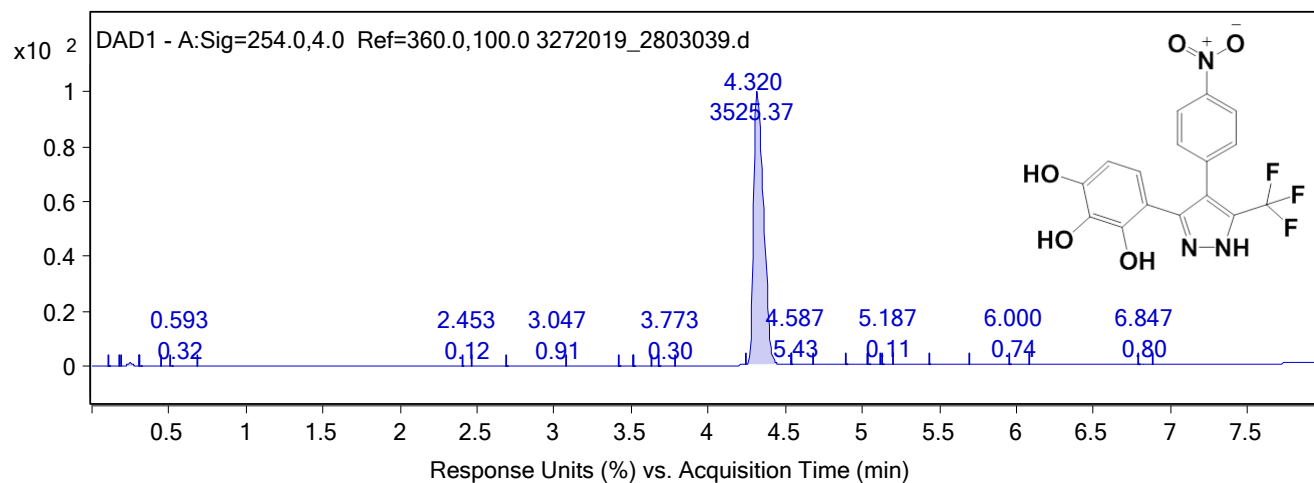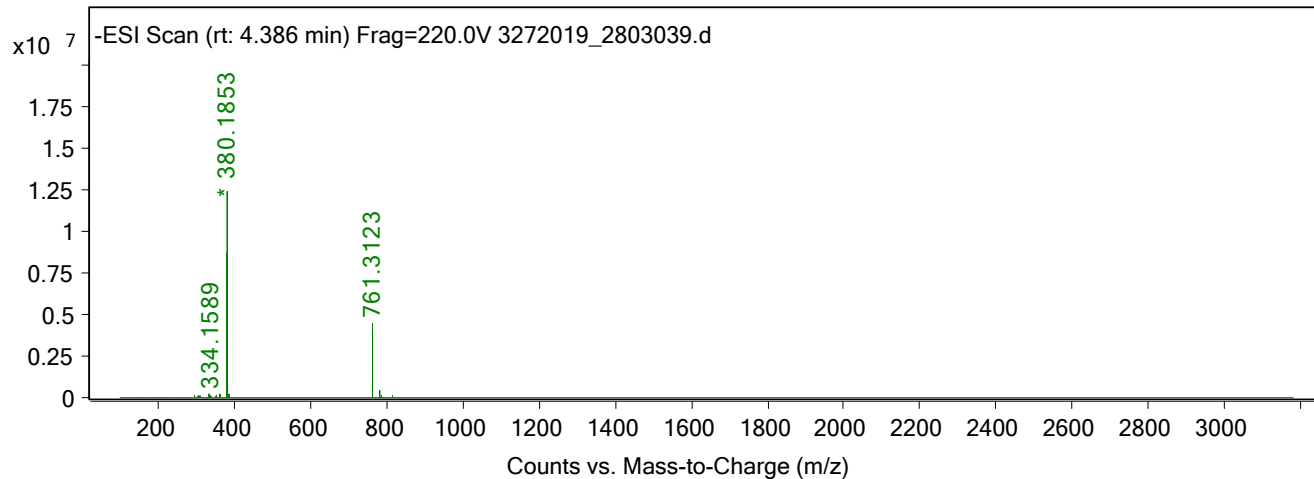

**Integration Peak List**

| Peak | Start | RT    | End   | Height | Area    | Area % |
|------|-------|-------|-------|--------|---------|--------|
| 1    | 0.107 | 0.16  | 0.18  | 0.04   | 0.14    | 0      |
| 2    | 0.193 | 0.247 | 0.307 | 9.68   | 25.89   | 0.73   |
| 3    | 0.307 | 0.427 | 0.453 | 0.07   | 1.09    | 0.03   |
| 4    | 0.507 | 0.593 | 0.68  | 0.05   | 0.32    | 0.01   |
| 5    | 2.4   | 2.453 | 2.467 | 0.02   | 0.12    | 0      |
| 6    | 2.687 | 3.047 | 3.073 | 0.04   | 0.91    | 0.03   |
| 7    | 3.42  | 3.473 | 3.513 | 0.09   | 0.46    | 0.01   |
| 8    | 3.513 | 3.567 | 3.633 | 0.17   | 0.65    | 0.02   |
| 9    | 3.68  | 3.773 | 3.787 | 0.02   | 0.3     | 0.01   |
| 10   | 4.24  | 4.32  | 4.533 | 776.29 | 3525.37 | 100    |
| 11   | 4.533 | 4.587 | 4.68  | 1.42   | 5.43    | 0.15   |
| 12   | 4.893 | 5.013 | 5.033 | 0.05   | 0.63    | 0.02   |
| 13   | 5.04  | 5.093 | 5.113 | 0.03   | 0.11    | 0      |
| 14   | 5.133 | 5.187 | 5.2   | 0.02   | 0.11    | 0      |
| 15   | 5.433 | 5.607 | 5.693 | 0.24   | 1.38    | 0.04   |
| 16   | 5.953 | 6     | 6.087 | 0.24   | 0.74    | 0.02   |
| 17   | 6.793 | 6.847 | 6.88  | 0.23   | 0.8     | 0.02   |

**Peak List**

| m/z      | z | Abund       |
|----------|---|-------------|
| 334.1589 |   | 274897.12   |
| 362.1558 |   | 233299.47   |
| 380.1853 |   | 12706700.53 |
| 381.1763 | 1 | 8703719.48  |
| 382.1761 | 1 | 1629723.38  |
| 761.3123 | 1 | 4636136.39  |
| 762.315  | 1 | 1694466.15  |
| 763.3191 | 1 | 349516.15   |
| 783.2986 | 1 | 474174.55   |
| 784.3021 | 1 | 169435.35   |

—13.76

—9.43

—8.67

—8.20

—8.18

—7.45

—7.43

—6.38

—6.36

—6.32

—6.30

$^1\text{H}$  NMR (400 MHz,  $\text{DMSO-}d_6$ ):  $\delta$  13.76 (s, 1H), 9.43 (s, 1H), 8.67 (s, 2H), 8.19 (d,  $J = 8.4$  Hz, 2H), 7.44 (d,  $J = 8.4$  Hz, 2H), 6.37 (d,  $J = 8.4$  Hz, 1H), 6.31 (d,  $J = 8.4$  Hz, 1H).

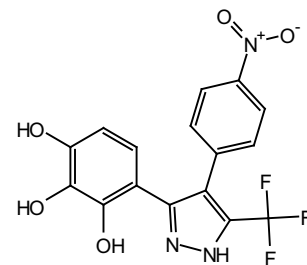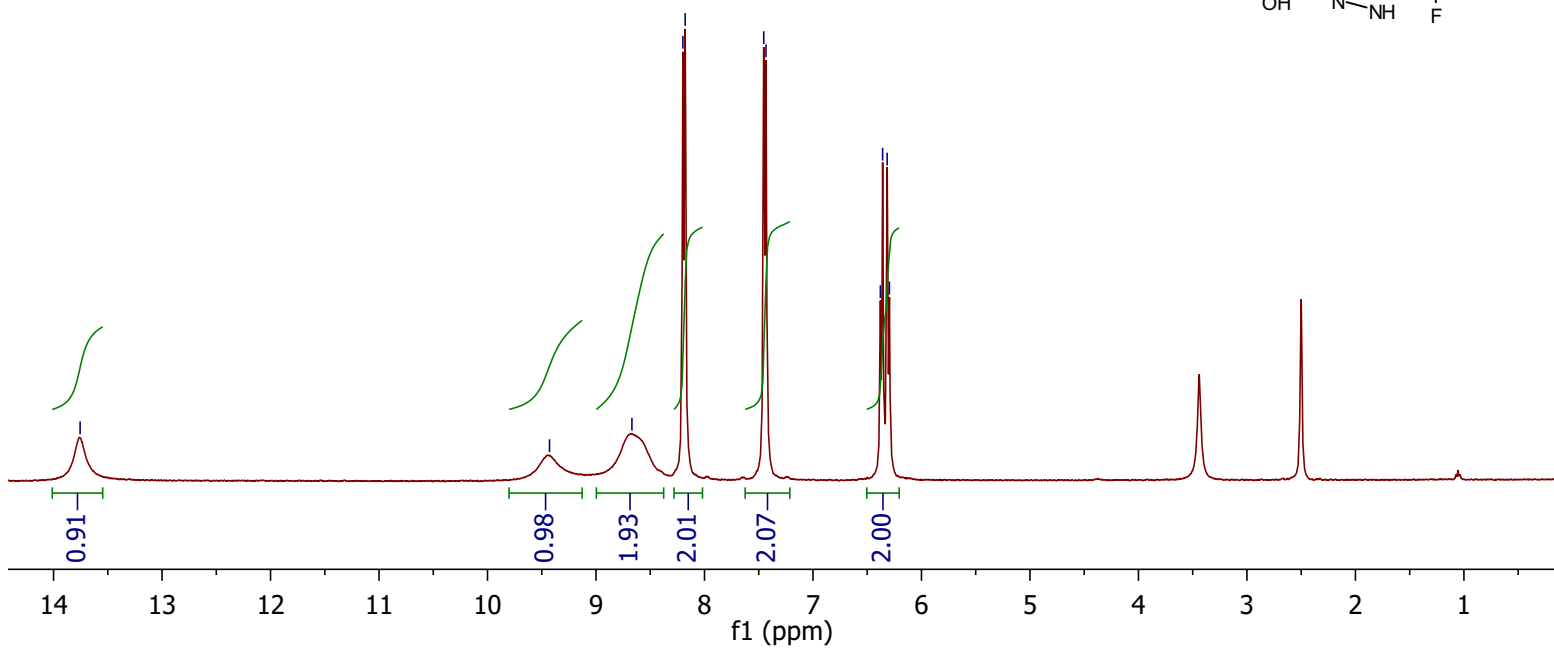

147.51  
146.45  
145.20  
141.05  
139.22  
138.67  
138.32  
137.98  
137.63  
133.39  
130.62  
123.43  
120.93  
120.78  
118.11  
116.15  
107.21  
106.84

$^{13}\text{C}$  NMR (100 MHz,  $\text{DMSO-}d_6$ ):  $\delta$  147.5, 146.5, 145.2, 141.1, 139.2, 138.2 (q,  $J_{\text{C-F}} = 34.7$  Hz), 133.4, 130.6, 123.4, 120.9, 119.4 (q,  $J_{\text{C-F}} = 268.9$  Hz), 116.2, 107.2, 106.8.

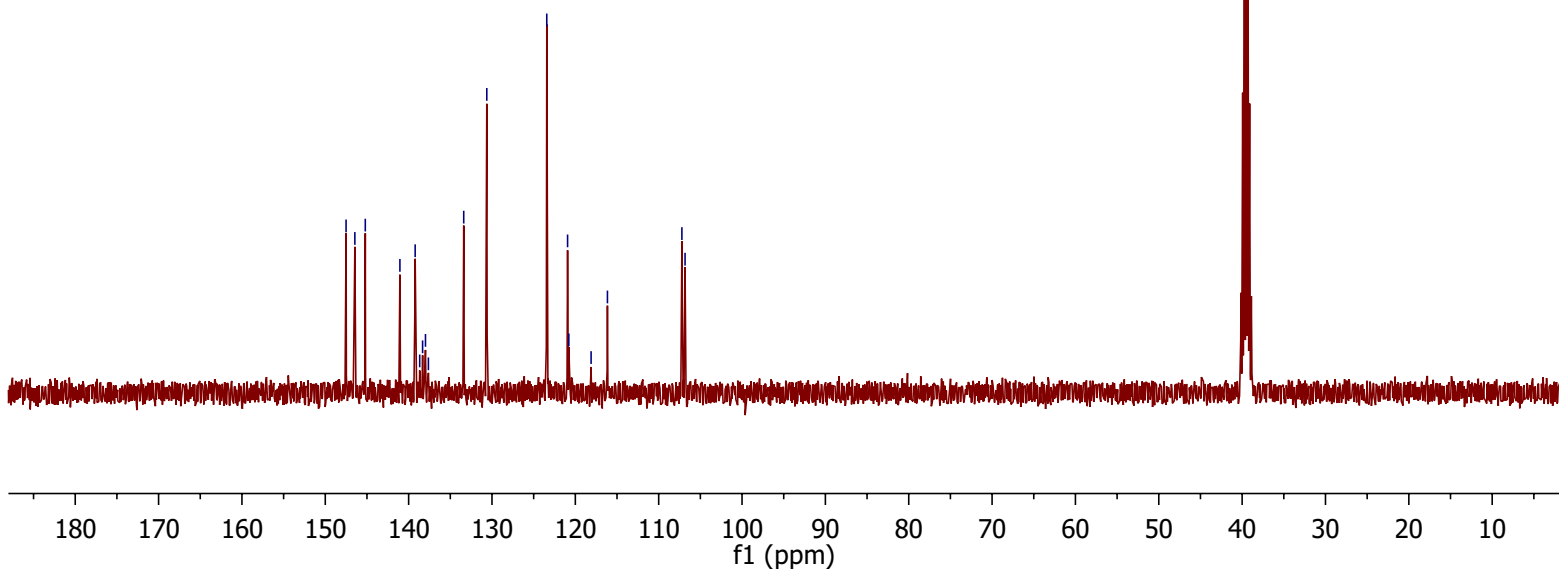

**Compound 28** 4-(4-(4-nitrophenyl)-5-(trifluoromethyl)-1H-pyrazol-3-yl)benzene-1,3-diol

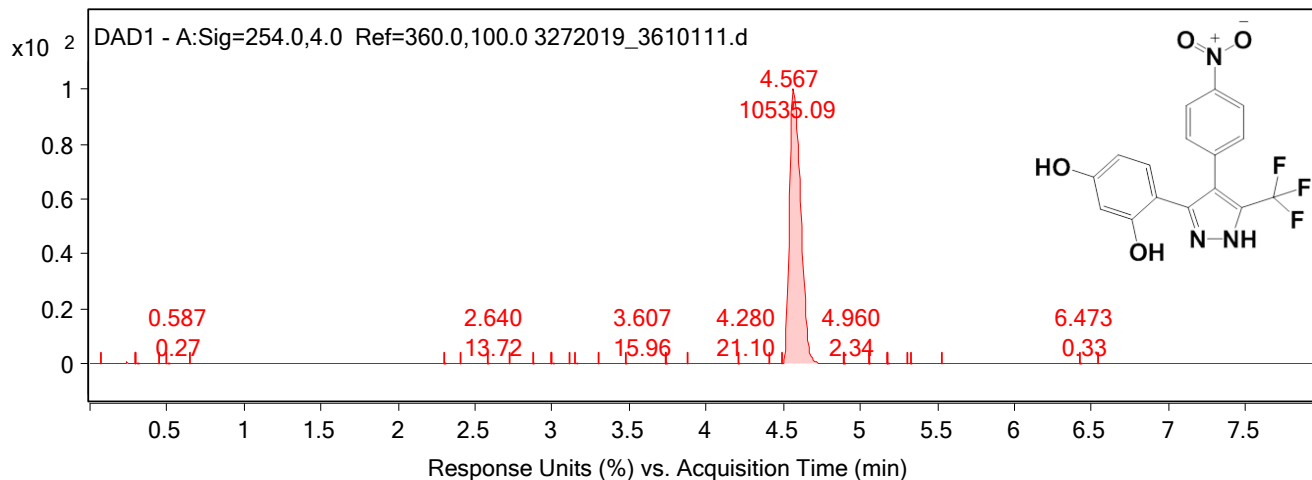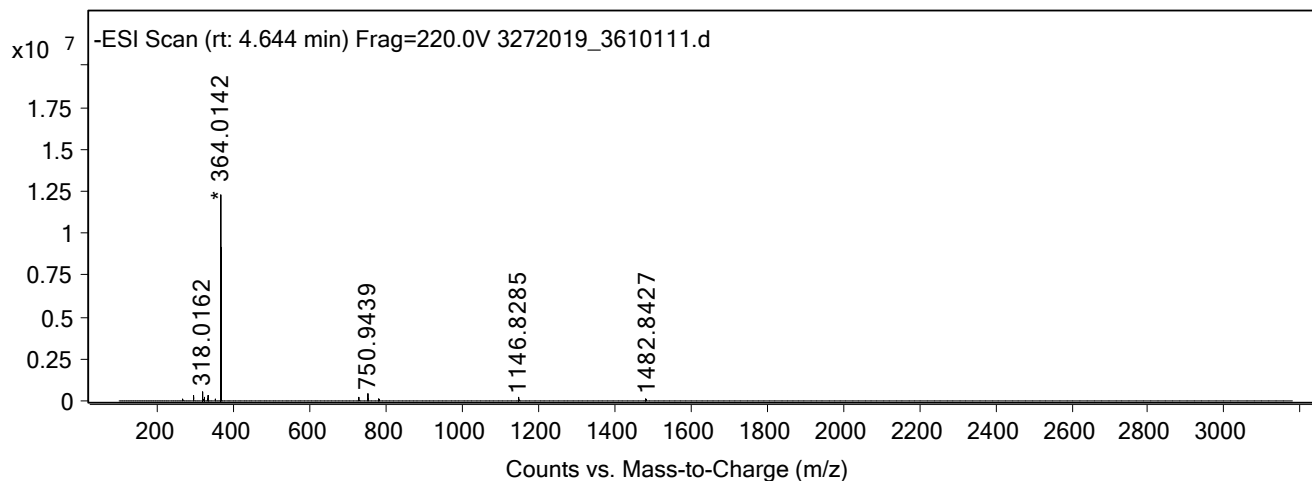

**Integration Peak List**

| Peak | Start | RT    | End   | Height  | Area     | Area % |
|------|-------|-------|-------|---------|----------|--------|
| 1    | 0.067 | 0.24  | 0.293 | 11.45   | 32.14    | 0.31   |
| 2    | 0.3   | 0.413 | 0.447 | 0.14    | 1.79     | 0.02   |
| 3    | 0.5   | 0.587 | 0.653 | 0.05    | 0.27     | 0      |
| 4    | 2.293 | 2.34  | 2.407 | 0.14    | 0.48     | 0      |
| 5    | 2.58  | 2.64  | 2.727 | 4       | 13.72    | 0.13   |
| 6    | 2.873 | 2.973 | 2.993 | 0.03    | 0.3      | 0      |
| 7    | 3     | 3.053 | 3.113 | 0.29    | 0.91     | 0.01   |
| 8    | 3.153 | 3.213 | 3.3   | 0.31    | 1.2      | 0.01   |
| 9    | 3.473 | 3.607 | 3.733 | 3.71    | 15.96    | 0.15   |
| 10   | 3.74  | 3.813 | 3.88  | 0.11    | 0.49     | 0      |
| 11   | 4.207 | 4.28  | 4.407 | 4.36    | 21.1     | 0.2    |
| 12   | 4.487 | 4.567 | 4.893 | 2066.21 | 10535.09 | 100    |
| 13   | 4.893 | 4.96  | 5.053 | 0.54    | 2.34     | 0.02   |
| 14   | 5.053 | 5.133 | 5.173 | 0.08    | 0.38     | 0      |
| 15   | 5.18  | 5.227 | 5.3   | 0.13    | 0.5      | 0      |
| 16   | 5.327 | 5.467 | 5.527 | 0.13    | 1.18     | 0.01   |
| 17   | 6.427 | 6.473 | 6.547 | 0.11    | 0.33     | 0      |

**Peak List**

| m/z       | z | Abund       |
|-----------|---|-------------|
| 295.9955  |   | 206110.03   |
| 296.024   |   | 369233.21   |
| 318.0162  |   | 561610.4    |
| 322.0002  |   | 248081.4    |
| 334.0075  |   | 354868.81   |
| 364.0142  |   | 12434473.79 |
| 365.0041  | 1 | 9120681.28  |
| 366.0032  | 1 | 1604321.45  |
| 750.9439  | 1 | 420235.35   |
| 1146.8285 |   | 197963.2    |

—13.76

9.77  
9.67

8.20  
8.18

7.46  
7.44

6.86  
6.84

6.39  
6.39

6.24  
6.23  
6.22  
6.21

$^1\text{H}$  NMR (400 MHz,  $\text{DMSO-}d_6$ ):  $\delta$  13.76 (s, 1H), 9.77 (s, 1H), 9.67 (s, 1H), 8.19 (d,  $J = 8.4$  Hz, 2H), 7.45 (d,  $J = 8.4$  Hz, 2H), 6.85 (d,  $J = 8.3$  Hz, 1H), 6.39 (d,  $J = 2.2$  Hz, 1H), 6.22 (dd,  $J = 2.3, 8.3$  Hz, 1H).

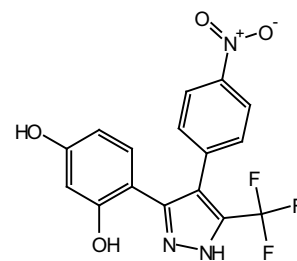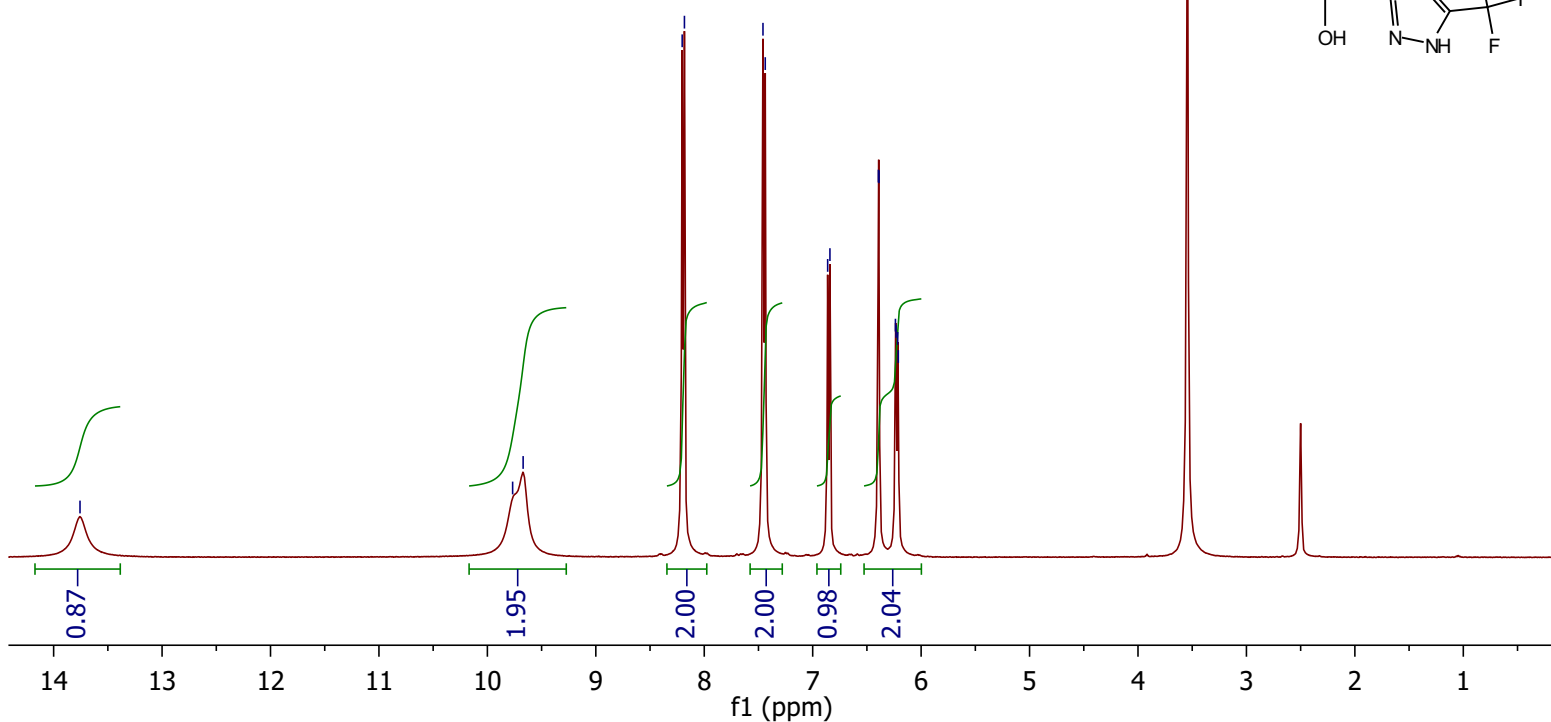

159.92  
156.77  
146.58  
140.96  
139.49  
138.92  
138.57  
138.22  
137.87  
132.00  
130.72  
126.21  
123.52  
123.37  
120.86  
118.19  
116.17  
107.18  
105.84  
103.02

$^{13}\text{C}$  NMR (100 MHz,  $\text{DMSO-}d_6$ ):  $\delta$  159.9, 156.8, 146.6, 141.0, 139.5, 138.4 (q,  $J_{C-F} = 35.2$  Hz), 132.0, 130.7, 123.5, 122.12 (q,  $J_{C-F} = 252.6$  Hz), 116.2, 107.2, 105.8, 103.0.

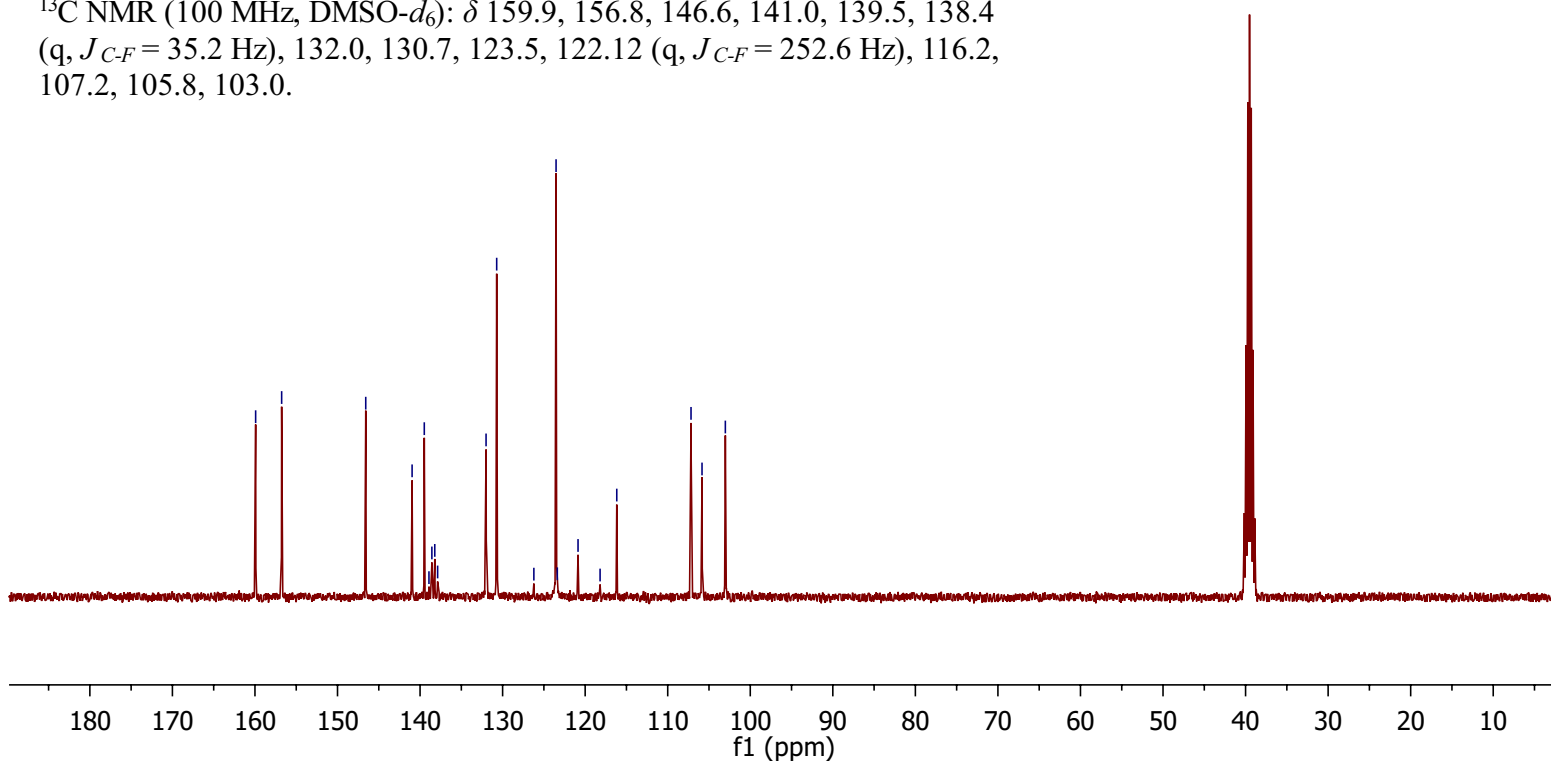

**Compound 29** methyl 4-(5-methyl-3-(2,3,4-trihydroxyphenyl)-1H-pyrazol-4-yl)benzoate

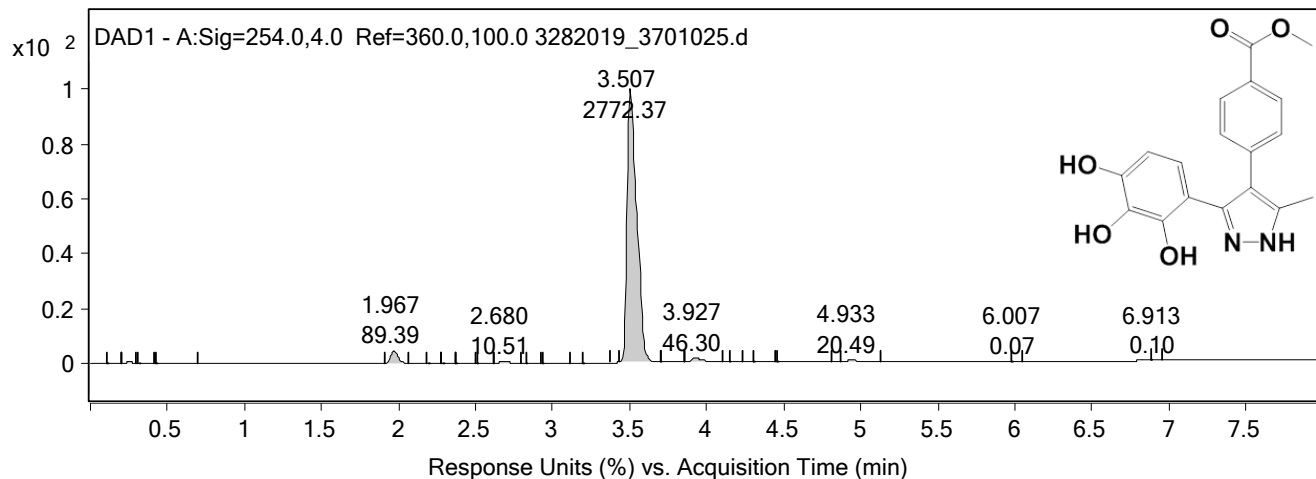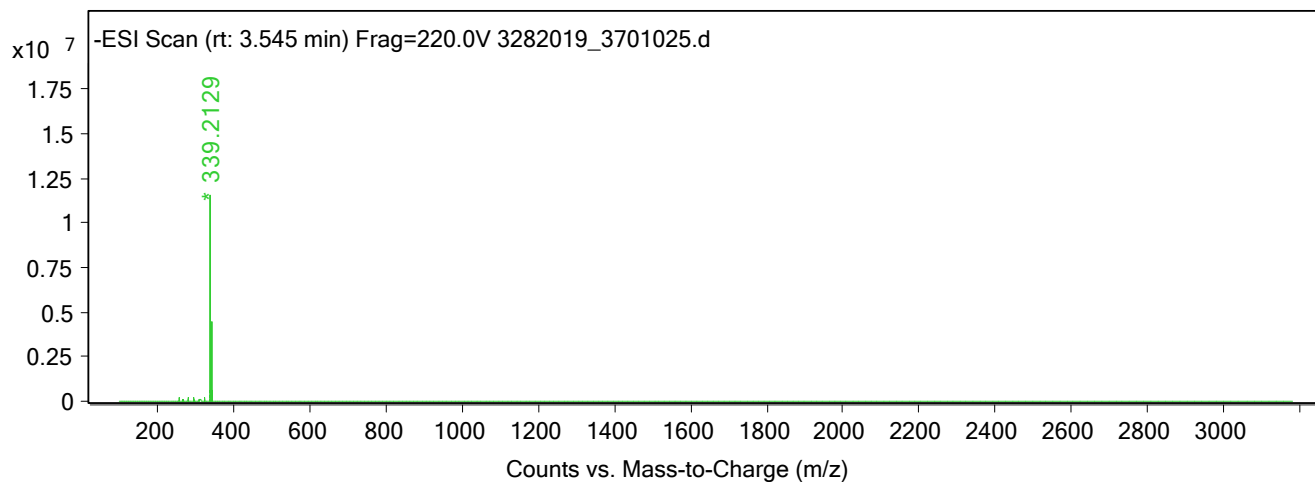

**Integration Peak List**

| Peak | Start | RT    | End   | Height | Area    | Area % |
|------|-------|-------|-------|--------|---------|--------|
| 1    | 0.107 | 0.167 | 0.2   | 0.12   | 0.41    | 0.01   |
| 2    | 0.2   | 0.253 | 0.3   | 4.73   | 12.14   | 0.44   |
| 3    | 0.307 | 0.36  | 0.413 | 0.39   | 1.43    | 0.05   |
| 4    | 0.42  | 0.6   | 0.7   | 0.08   | 0.8     | 0.03   |
| 5    | 1.913 | 1.967 | 2.067 | 28.15  | 89.39   | 3.22   |
| 6    | 2.187 | 2.247 | 2.28  | 0.07   | 0.2     | 0.01   |
| 7    | 2.28  | 2.327 | 2.373 | 0.1    | 0.27    | 0.01   |
| 8    | 2.373 | 2.427 | 2.5   | 1.29   | 4.3     | 0.16   |
| 9    | 2.507 | 2.56  | 2.613 | 0.12   | 0.42    | 0.02   |
| 10   | 2.62  | 2.68  | 2.793 | 2.69   | 10.51   | 0.38   |
| 11   | 2.827 | 2.893 | 2.927 | 0.17   | 0.69    | 0.02   |
| 12   | 2.933 | 3.027 | 3.107 | 0.36   | 1.42    | 0.05   |
| 13   | 3.2   | 3.333 | 3.373 | 0.08   | 0.49    | 0.02   |
| 14   | 3.433 | 3.507 | 3.7   | 635.92 | 2772.37 | 100    |
| 15   | 3.7   | 3.747 | 3.853 | 1.42   | 5.54    | 0.2    |
| 16   | 3.86  | 3.927 | 4.1   | 10.48  | 46.3    | 1.67   |
| 17   | 4.147 | 4.193 | 4.227 | 0.18   | 0.5     | 0.02   |
| 18   | 4.307 | 4.353 | 4.447 | 0.09   | 0.37    | 0.01   |
| 19   | 4.46  | 4.693 | 4.807 | 0.28   | 1.82    | 0.07   |
| 20   | 4.867 | 4.933 | 5.133 | 3.7    | 20.49   | 0.74   |
| 21   | 5.98  | 6.007 | 6.047 | 0.04   | 0.07    | 0      |
| 22   | 6.88  | 6.913 | 6.96  | 0.04   | 0.1     | 0      |

**Peak List**

| m/z      | z | Abund      |
|----------|---|------------|
| 255.2032 |   | 180636.92  |
| 265.1898 |   | 126923.55  |
| 280.1808 |   | 163077.06  |
| 293.1919 |   | 246760.14  |
| 321.1938 |   | 256158.71  |
| 324.1813 |   | 122572.63  |
| 337.1921 |   | 154442.91  |
| 339.2129 | 1 | 11713325.3 |
| 340.2121 | 1 | 4426241.05 |
| 341.2148 | 1 | 596064.5   |

7.89  
7.877.32  
7.306.33  
6.31  
6.28  
6.26

—3.76

—2.34

$^1\text{H}$  NMR (400 MHz,  $\text{DMSO-}d_6+\text{CF}_3\text{SO}_3\text{H}$ )  $\delta$  7.88 (d,  $J = 7.9$  Hz, 2H), 7.31 (d,  $J = 7.9$  Hz, 2H), 6.32 (d,  $J = 8.9$  Hz, 1H), 6.27 (d,  $J = 8.9$  Hz, 1H), 3.76 (s, 3H), 2.34 (s, 3H).

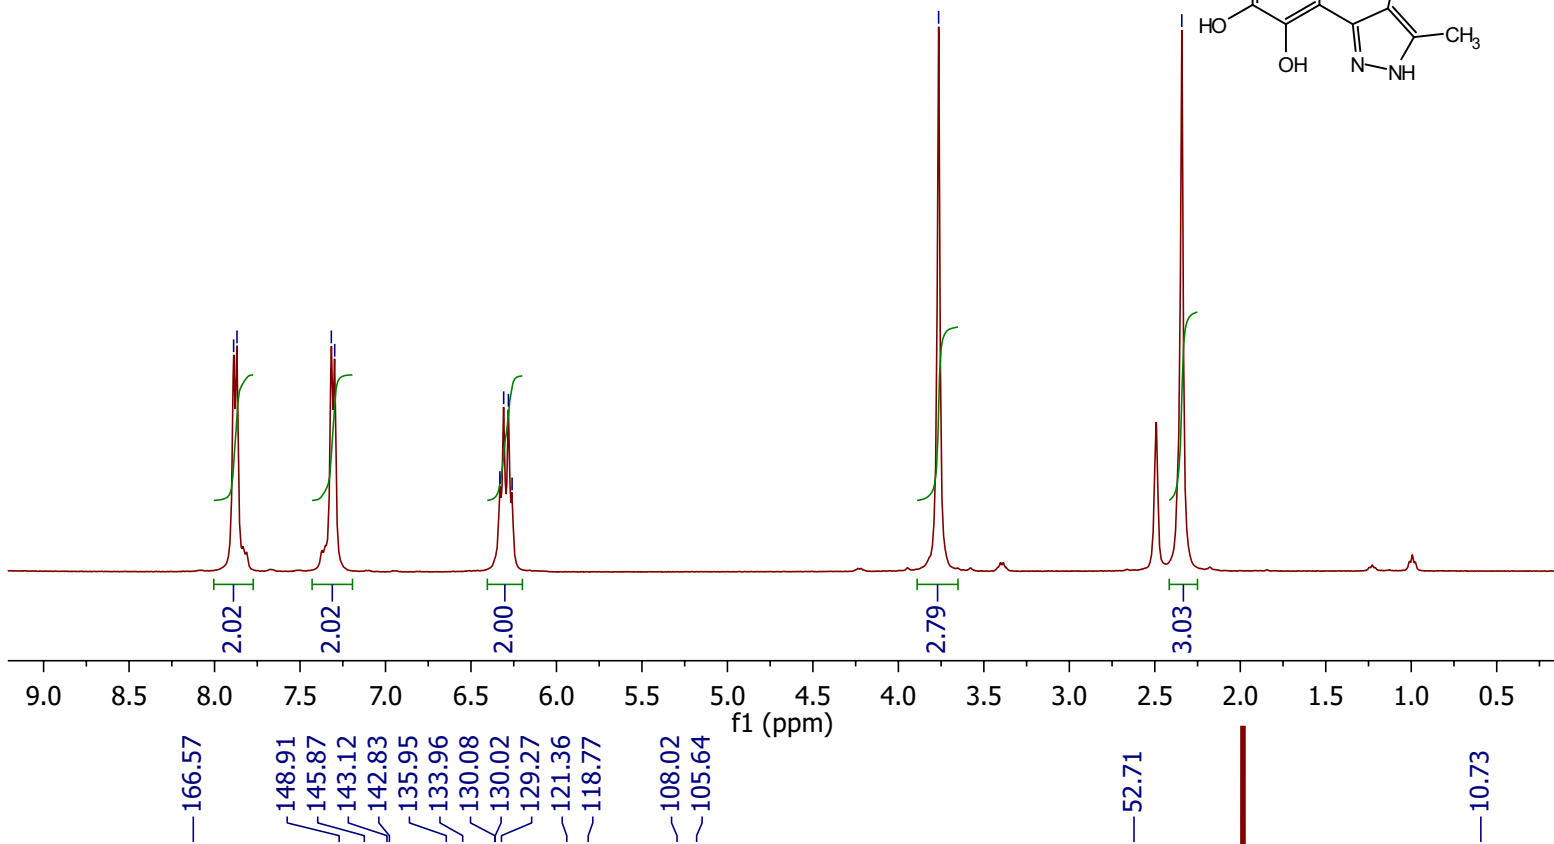

$^{13}\text{C}$  NMR (100 MHz,  $\text{DMSO-}d_6+\text{CF}_3\text{SO}_3\text{H}$ )  $\delta$  166.6, 148.9, 145.9, 143.1, 142.8, 135.9, 134.0, 130.1, 130.0, 129.3, 121.4, 118.8, 108.0, 105.6, 52.7, 10.7.

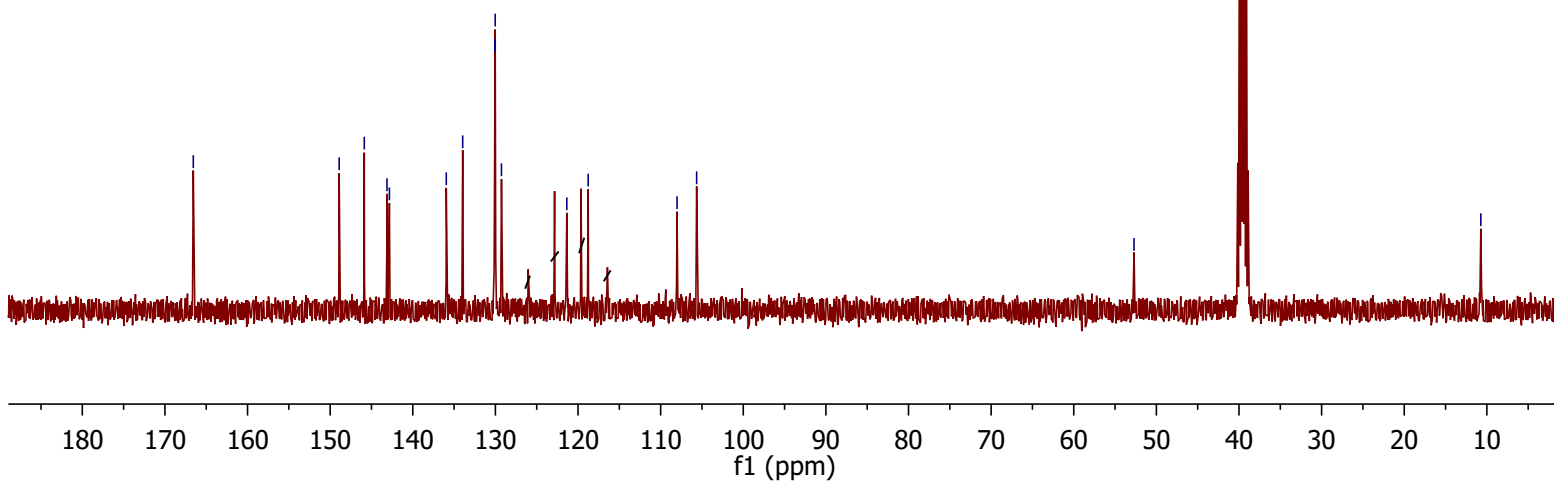



**Compound 30** 4-(4-(4-(trifluoromethoxy)phenyl)-5-(trifluoromethyl)-1H-pyrazol-3-yl)benzene-1,2,3-triol

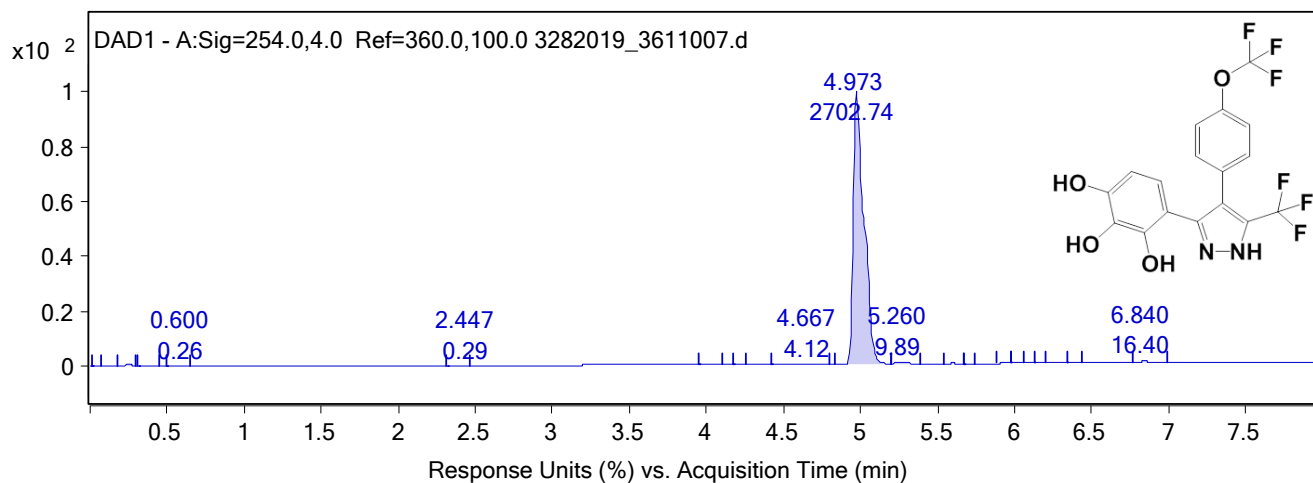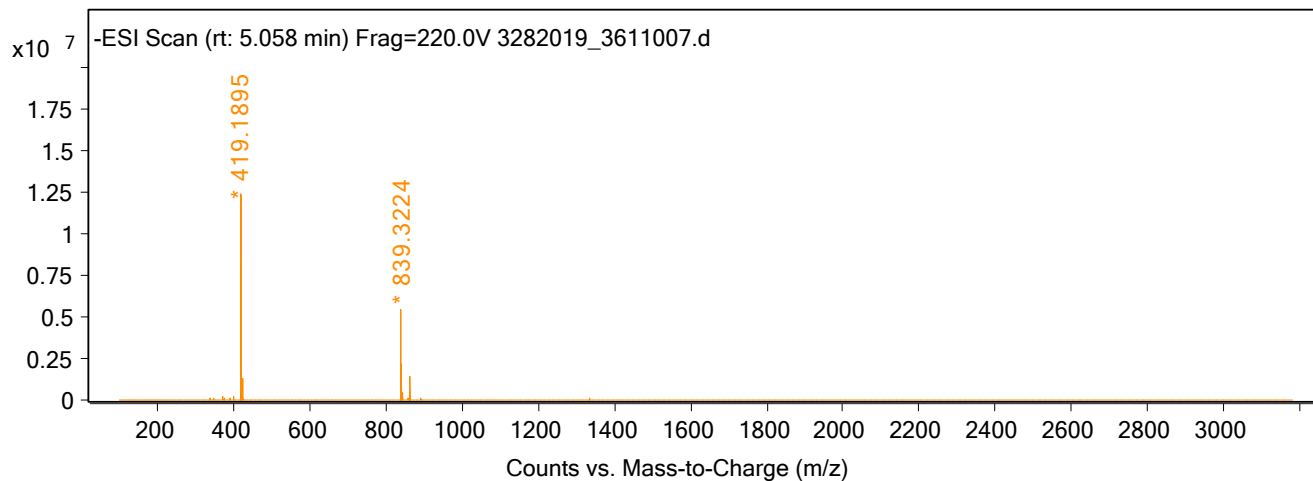

**Integration Peak List**

| Peak | Start | RT    | End   | Height | Area    | Area % |
|------|-------|-------|-------|--------|---------|--------|
| 1    | 0.013 | 0.027 | 0.067 | 0.04   | 0.06    | 0      |
| 2    | 0.18  | 0.253 | 0.3   | 6.17   | 16.38   | 0.61   |
| 3    | 0.307 | 0.433 | 0.453 | 0.07   | 1.46    | 0.05   |
| 4    | 0.493 | 0.6   | 0.653 | 0.04   | 0.26    | 0.01   |
| 5    | 2.313 | 2.447 | 2.467 | 0.03   | 0.29    | 0.01   |
| 6    | 3.953 | 4.053 | 4.107 | 0.09   | 1.12    | 0.04   |
| 7    | 4.173 | 4.227 | 4.253 | 0.11   | 0.41    | 0.02   |
| 8    | 4.42  | 4.667 | 4.793 | 0.65   | 4.12    | 0.15   |
| 9    | 4.833 | 4.973 | 5.193 | 561.52 | 2702.74 | 100    |
| 10   | 5.193 | 5.26  | 5.393 | 2.08   | 9.89    | 0.37   |
| 11   | 5.54  | 5.6   | 5.673 | 0.5    | 1.91    | 0.07   |
| 12   | 5.673 | 5.707 | 5.74  | 0.06   | 0.12    | 0      |
| 13   | 5.887 | 5.94  | 5.973 | 0.25   | 0.84    | 0.03   |
| 14   | 5.973 | 6.013 | 6.06  | 0.09   | 0.21    | 0.01   |
| 15   | 6.127 | 6.173 | 6.207 | 0.12   | 0.35    | 0.01   |
| 16   | 6.34  | 6.413 | 6.44  | 0.07   | 0.36    | 0.01   |
| 17   | 6.767 | 6.84  | 6.993 | 3.21   | 16.4    | 0.61   |

**Peak List**

| m/z      | z | Abund       |
|----------|---|-------------|
| 373.1598 |   | 187130.78   |
| 417.1603 |   | 341553.13   |
| 419.1895 |   | 12683152.94 |
| 420.1817 | 1 | 8182555.38  |
| 421.1819 | 1 | 1347142.76  |
| 839.3224 | 1 | 5581031.84  |
| 840.3246 | 1 | 2170775.6   |
| 841.3283 | 1 | 445301.29   |
| 861.3074 | 1 | 1393080.72  |
| 862.3115 | 1 | 507471.33   |

—13.59

—9.42

—8.72

—8.52

7.32

7.29

7.27

6.30

6.28

6.25

6.23

$^1\text{H}$  NMR (400 MHz,  $\text{DMSO-}d_6$ ):  $\delta$  13.59 (s, 1H), 9.42 (s, 1H), 8.72 (s, 1H), 8.52 (s, 1H), 7.34 – 7.25 (m, 4H), 6.29 (d,  $J = 8.9$  Hz, 1H), 6.24 (d,  $J = 8.9$  Hz, 1H).

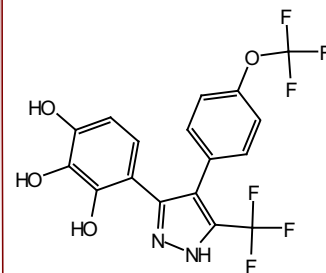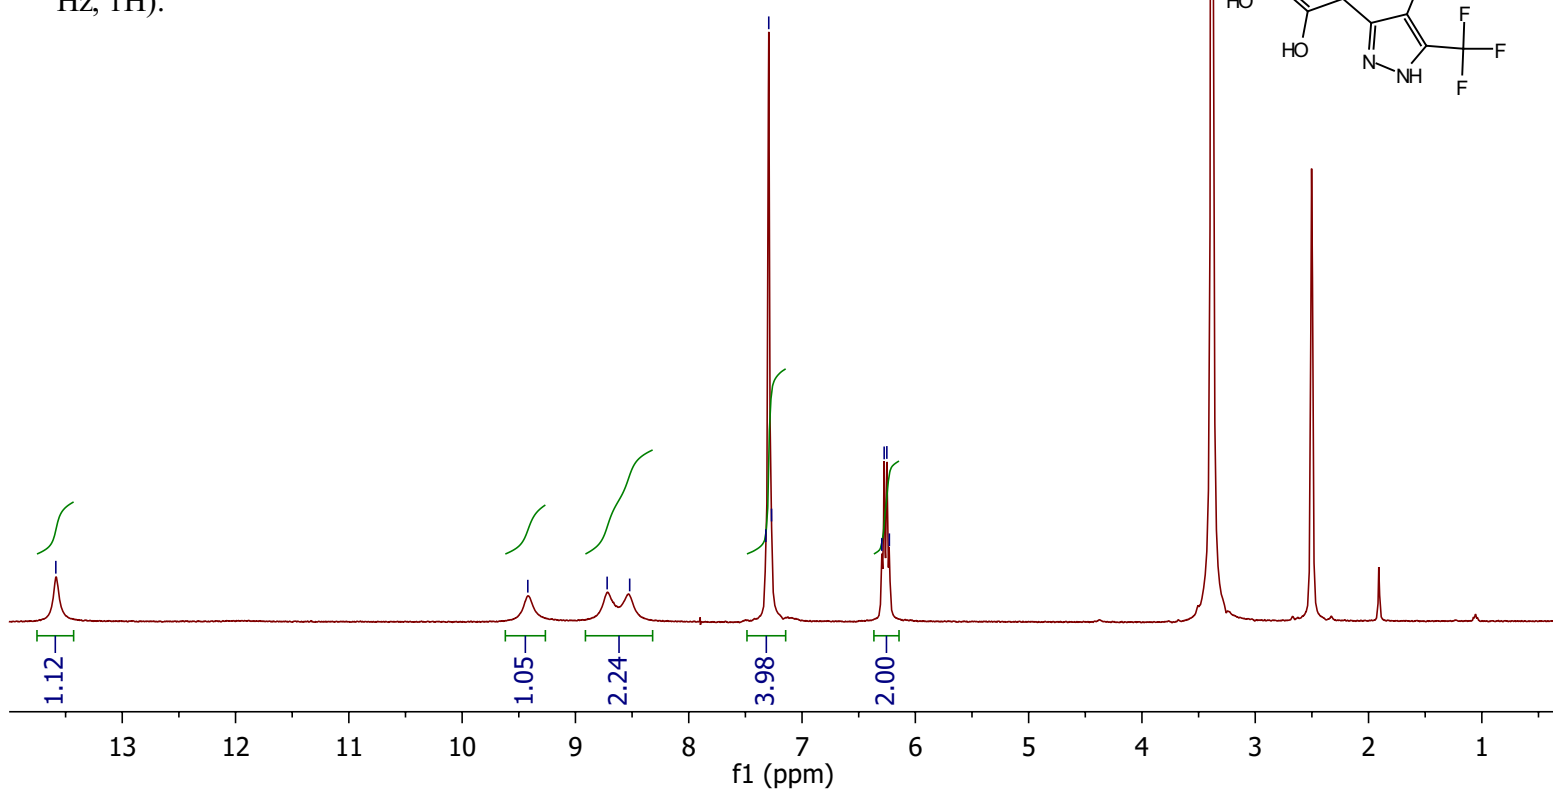

147.51  
147.49  
147.47  
147.46  
147.21  
145.32  
140.41  
138.30  
137.95  
133.24  
131.47  
131.05  
123.98  
123.57  
121.43  
120.91  
120.61  
118.88  
116.67  
116.34  
107.15  
106.95

$^{13}\text{C}$  NMR (100 MHz,  $\text{DMSO-}d_6$ ):  $\delta$  147.5 (q,  $J_{\text{C-F}} = 1.8$  Hz), 147.2, 145.3, 140.4, 138.1 (q,  $J_{\text{C-F}} = 35.0$  Hz), 133.2, 131.5, 131.1, 120.9, 120.6, 120.2 (q,  $J_{\text{C-F}} = 256.3$  Hz), 122.1 (q,  $J_{\text{C-F}} = 297.5$  Hz), 116.7, 107.2, 106.9.

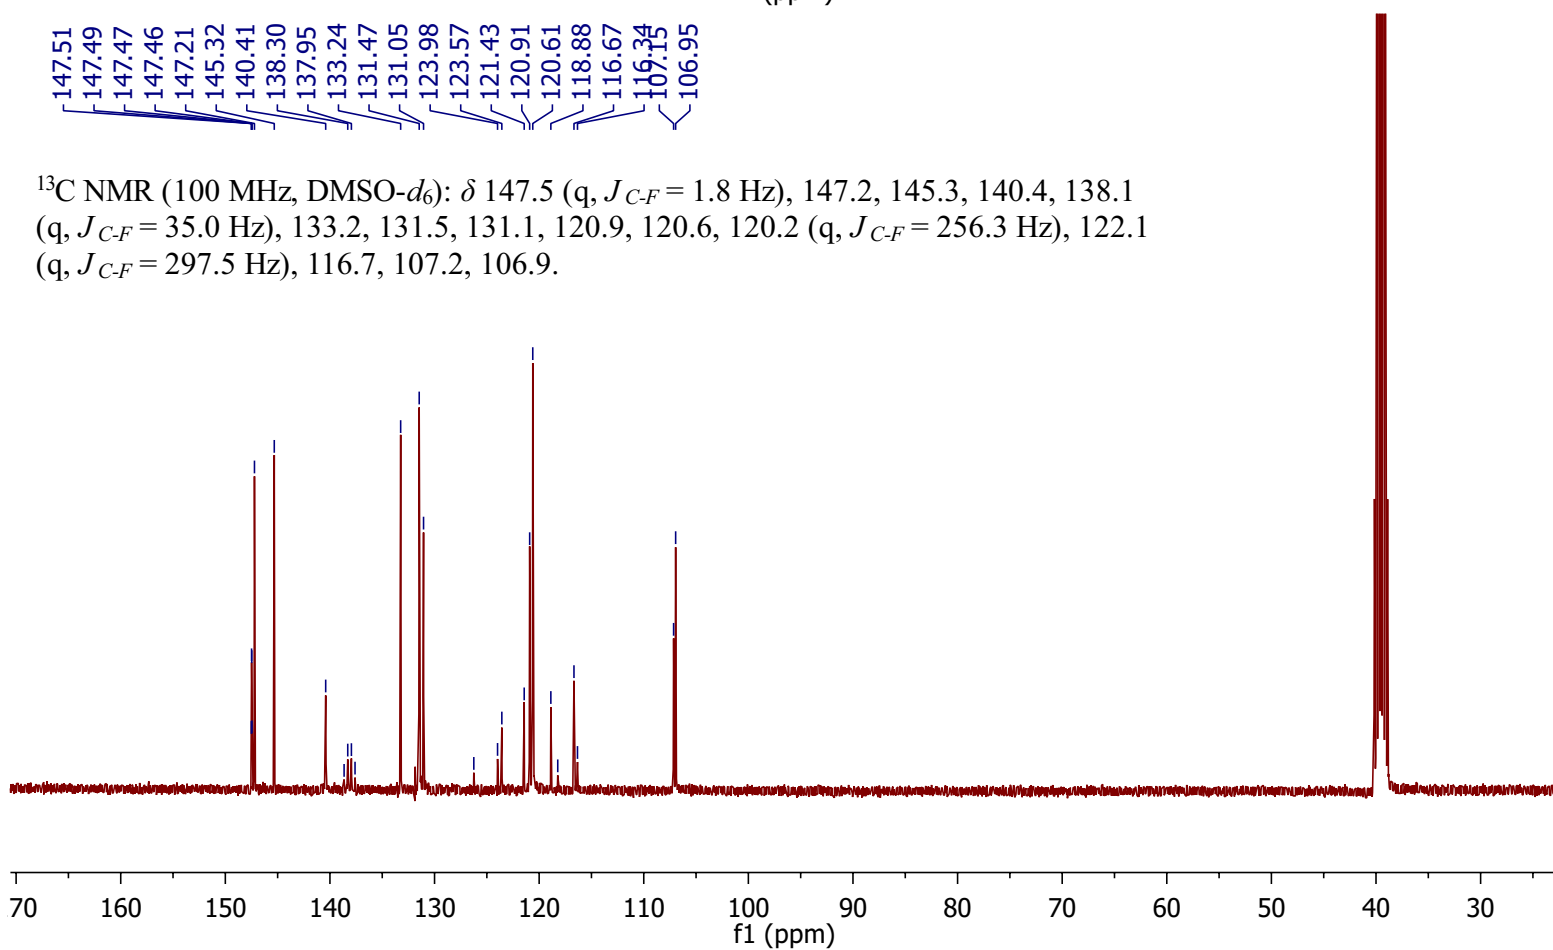

Supplement: NIHMS1586155-supplement-Supplemental_Information.pdf [file NIHMS1586155-supplement-Supplemental_Information.pdf]
